# Supplementary material for: Demographic and clinical characteristics of hospitalised unintentional poisoning in Aboriginal and non-Aboriginal preschool children in New South Wales, Australia: a population data linkage study
Source: PubMed Central journal article supplement — BMJ Open. 2019 Jan 30;9(1):e022633. doi: 10.1136/bmjopen-2018-022633 (PMC6359875; doi:10.1136/bmjopen-2018-022633), 2019-01-30
Supplement: bmjopen-2018-022633.draft_revisions.pdf [file bmjopen-2018-022633.draft_revisions.pdf]

# BMJ Open

BMJ Open is committed to open peer review. As part of this commitment we make the peer review history of every article we publish publicly available.

When an article is published we post the peer reviewers' comments and the authors' responses online. We also post the versions of the paper that were used during peer review. These are the versions that the peer review comments apply to.

The versions of the paper that follow are the versions that were submitted during the peer review process. They are not the versions of record or the final published versions. They should not be cited or distributed as the published version of this manuscript.

BMJ Open is an open access journal and the full, final, typeset and author-corrected version of record of the manuscript is available on our site with no access controls, subscription charges or pay-per-view fees (<http://bmjopen.bmj.com>).

If you have any questions on BMJ Open's open peer review process please email [editorial.bmjopen@bmj.com](mailto:editorial.bmjopen@bmj.com)

# BMJ Open

## Demographic and clinical characteristics of hospitalised unintentional poisoning in Aboriginal and non-Aboriginal preschool children in New South Wales, Australia: a population data linkage study

|                               |                                                                                                                                                                                                                                                                                                                                                                                                                                                                                                                                                                                                                          |
|-------------------------------|--------------------------------------------------------------------------------------------------------------------------------------------------------------------------------------------------------------------------------------------------------------------------------------------------------------------------------------------------------------------------------------------------------------------------------------------------------------------------------------------------------------------------------------------------------------------------------------------------------------------------|
| Journal:                      | <i>BMJ Open</i>                                                                                                                                                                                                                                                                                                                                                                                                                                                                                                                                                                                                          |
| Manuscript ID                 | bmjopen-2018-022633                                                                                                                                                                                                                                                                                                                                                                                                                                                                                                                                                                                                      |
| Article Type:                 | Research                                                                                                                                                                                                                                                                                                                                                                                                                                                                                                                                                                                                                 |
| Date Submitted by the Author: | 02-Mar-2018                                                                                                                                                                                                                                                                                                                                                                                                                                                                                                                                                                                                              |
| Complete List of Authors:     | Lee, Caroline; University of New South Wales - Randwick Campus, Hanly, Mark; University of New South Wales, Centre for Big Data Research in Health<br>Larter, Natasha; Sydney Children's Hospitals Network Randwick and Westmead, Community Child Health<br>Zwi, Karen; Sydney Children's Hospitals Network Randwick and Westmead, Community Child Health; University of New South Wales<br>Woolfenden, Susan ; Sydney Children's Hospitals Network Randwick and Westmead, Community Child Health; University of New South Wales,<br>Jorm, Louisa; University of New South Wales, Centre for Big Data Research in Health |
| Keywords:                     | Child, preschool, Poisoning, Aboriginal, Data linkage, unintentional injury                                                                                                                                                                                                                                                                                                                                                                                                                                                                                                                                              |
|                               |                                                                                                                                                                                                                                                                                                                                                                                                                                                                                                                                                                                                                          |

SCHOLARONE™  
Manuscripts

1  
2  
3 **Title:** Demographic and clinical characteristics of hospitalised unintentional poisoning in  
4 Aboriginal and non-Aboriginal preschool children in New South Wales, Australia: a population  
5 data linkage study  
6  
7

8  
9 **Corresponding author:** Caroline Lee, 6 Royal Poinciana Way Coffs Harbour,  
10 [caroline.lee@unsw.edu.au](mailto:caroline.lee@unsw.edu.au)  
11

12  
13 **Co-Authors:**

14  
15 Caroline Lee, University of New South Wales, Sydney, Australia  
16

17  
18 Mark Hanly, Centre for Big Data Research in Health, University of New South Wales, Sydney,  
19 Australia  
20

21  
22 Natasha Larter, Department of Community Child Health, Sydney Children's Hospital Network,  
23 Sydney, Australia  
24

25  
26 Karen Zwi, Department of Community Child Health, Sydney Children's Hospital Network,  
27 Sydney, Australia; University of New South Wales, Sydney, Australia  
28

29  
30 Susan Woolfenden, Department of Community Child Health, Sydney Children's Hospital  
31 Network, Sydney, Australia; University of New South Wales, Sydney, Australia  
32

33  
34 Louisa Jorm, Centre for Big Data Research in Health, University of New South Wales, Sydney,  
35 Australia  
36

37  
38 **Keywords [MeSH]:** poisoning; child, preschool; accidents; Oceanic Ancestry Group;  
39 hospitalization/statistics and numerical data  
40

41  
42 **Word count:** 2991  
43  
44  
45  
46  
47  
48  
49  
50  
51  
52  
53  
54  
55  
56  
57  
58  
59  
60

1  
2  
3 **Demographic and clinical characteristics of hospitalised unintentional poisoning in Aboriginal and**  
4 **non-Aboriginal preschool children in New South Wales, Australia: a population data linkage study**  
5  
6  
7

8  
9 **Abstract**  
10

11 **Objectives:** To investigate differences in demographic and clinical characteristics of Aboriginal and non-  
12 Aboriginal children aged 0-4 years hospitalised for unintentional poisoning in New South Wales (NSW),  
13 Australia.  
14  
15

16  
17 **Design and setting:** Retrospective whole-of-population cohort analysis of linked hospital and mortality  
18 data for 2000-2014  
19

20  
21 **Participants:** All children (Aboriginal and non-Aboriginal) under the age of five years who born in a  
22 hospital in NSW from 2000 to 2009  
23

24  
25 **Outcomes:** The primary outcome was hospitalisation for unintentional poisoning. Logistic regression was  
26 used to estimate odds of poisoning hospitalisation for Aboriginal and non-Aboriginal children. Poisoning  
27 agents and clinical outcomes were compared by Aboriginality.  
28  
29

30  
31 **Results:** The cohort included 767,119 children, including 28,528 (3.7%) Aboriginal children. Aboriginal  
32 children had approximately three times higher rates of hospitalised poisoning (1.34%) compared to non-  
33 Aboriginal children (0.41%). Poisoning incidence peaked at 2-3 years of age. Male sex, socioeconomic  
34 disadvantage and geographic remoteness were associated with higher odds of poisoning hospitalisation  
35 for Aboriginal and non-Aboriginal children, but associations with disadvantage and remoteness were  
36 statistically significant only for non-Aboriginal children. Most (83%) poisonings were caused by  
37 pharmaceutical agents. Few Aboriginal and non-Aboriginal children had repeat admissions for poisoning;  
38 most had a length of stay of one day or less. Only 8% of poisoning admissions involved contact with a  
39 social worker.  
40  
41  
42  
43  
44

45  
46 **Conclusion:** Commonly used medications in the general population contribute to poisonings amongst  
47 both Aboriginal and non-Aboriginal preschool aged children. This study highlights a need to develop  
48 culturally safe poisoning prevention strategies and policies.  
49  
50

51  
52 **Strengths and limitations of this study**  
53  
54  
55  
56  
57  
58  
59  
60

- 1  
2  
3 • This study's strengths include its focus on preschool-aged children, large sample size due whole-  
4 of-population design, and minimal recall bias due to the use of routinely collected administrative  
5 data.  
6
- 7  
8 • However, the use of administrative data limited the available covariates, so risk factors such as  
9 parent demographics, supervision and storage practice, and clinical information such as  
10 symptoms and treatment details, could not be examined.  
11
- 12  
13 • Children were identified as Aboriginal if they had been recorded at least once as Aboriginal  
14 ('ever-identified' algorithm), which enhances the proportion of Aboriginal children recorded  
15 using hospital data but may introduce bias in that sicker children with more frequent  
16 hospitalisations have more opportunities for identification.  
17
- 18  
19 • Our analysis of poisoning agents was limited to the International Classification of Diseases 10<sup>th</sup>  
20 edition (ICD-10) taxonomy, and in some circumstances it was not possible to determine specific  
21 agents, for example, 'other' categories.  
22  
23  
24  
25  
26  
27  
28  
29  
30  
31  
32  
33  
34  
35  
36  
37  
38  
39  
40  
41  
42  
43  
44  
45  
46  
47  
48  
49  
50  
51  
52  
53  
54  
55  
56  
57  
58  
59  
60

## Introduction

Poisoning is a leading cause of childhood injury worldwide.[1] Preschool children (0-4 years) have a higher risk of poisoning related hospital admissions [2-4] due to their developmental stage [5] and are a priority for prevention. Amongst preschool children, poisoning incidence peaks at two to three years of age,[3, 5-8] reflecting their increased mobility and exploratory skills.[5, 6, 9]

Pharmaceutical substances, such as over-the-counter and prescription medications, cause most unintentional poisonings in Australia.[4] Amongst preschool children in Australia, the most common causes of hospitalised pharmaceutical poisoning include analgesic, anti-epileptic, psychotropic, and other systemic and cardiovascular medications.[3, 4, 7, 10-12]

Various demographic and socioeconomic risk factors contribute to poisoning amongst preschool children. Factors relating to the child (male, higher birth order), parents (younger age, perinatal depression, alcohol misuse), unsafe storage and socioeconomic deprivation are associated with increased poisoning risk.[1-3, 7, 8, 13-16] In Australia, remote areas also have higher poisoning rates.[4, 16]

Poisoning represents one of the largest Indigenous child health inequalities in high-income countries, with rate ratios for hospitalisation and mortality ranging from 1.1 to 3.9 and 1.2 to 15.4 respectively.[17] A recent whole-of-population study in New South Wales, Australia reported that Aboriginal children had nearly three times higher risk of poisoning hospitalisation compared with non-Aboriginal children.[18] Existing studies about poisoning amongst Indigenous children in high-income countries have limitations, such as the lack of a non-Indigenous comparison group and wide age ranges up to 18 years old that do not differentiate younger children.[19, 20] Previous Australian studies of poisoning amongst preschool children in the general population have not focussed on Aboriginal children.[3, 5, 7, 22] The current literature about poisoning amongst Aboriginal children in Australia is limited in its examination of risk factors and clinical outcomes.[11, 12, 18, 21] Specific poisoning agents and clinical outcomes of poisoning for Aboriginal children have not been described.[2, 10, 16, 23]

This is the first study to examine the characteristics of unintentional poisoning amongst preschool-aged Aboriginal Australian children. The study aimed to answer questions that will inform prevention efforts:

- 1) Are the demographic risk factors for poisoning (sex, socioeconomic status and geographic remoteness) similar for both Aboriginal and non-Aboriginal children?
- 2) Which agents most frequently result in poisoning hospitalisation and are they different for Aboriginal and non-Aboriginal children?

1  
2  
3  
4  
5  
6  
7  
8  
9  
10  
11  
12  
13  
14  
15  
16  
17  
18  
19  
20  
21  
22  
23  
24  
25  
26  
27  
28  
29  
30  
31  
32  
33  
34  
35  
36  
37  
38  
39  
40  
41  
42  
43  
44  
45  
46  
47  
48  
49  
50  
51  
52  
53  
54  
55  
56  
57  
58  
59  
60

3) Are the clinical outcomes from hospitalised poisoning similar for Aboriginal and non-Aboriginal children?

For peer review only

## Methods

### Study design and setting

This was a retrospective, whole-of-population cohort study using linked hospital and mortality data for NSW, Australia for the period 2000 to 2014. According to the 2011 Census, NSW had a population of 6,917,658 people, of whom 172,624 (2.5%) were Aboriginal or Torres Strait Islander.[24]

### Data Sources

This study was part of the Indigenous Health Outcomes Patient Evaluation (IHOPE) project which compares health outcomes for Aboriginal and non-Aboriginal people in NSW using linked hospital and mortality data (Figure 1). Hospital data were sourced from the Admitted Patient Data Collection (APDC) and mortality data from the NSW Register of Births, Deaths and Marriages (RBDM). Probabilistic data linkage was performed by the NSW Centre for Health Record Linkage (<http://www.cherel.org.au>). De-identified, linked datasets were supplied to the researchers.

The RBDM contains details for all deaths in NSW. The APDC contains records for all inpatient separations (discharges, transfers and deaths) for all public and private hospitals and day procedure centres in NSW. Each separation record contains information about patient demographics, diagnoses, and procedures. Diagnoses are coded according to the International Classification of Diseases and Related Problems Australian Modification, tenth revision (ICD-10-AM). Separations are hereafter referred to as hospital admissions.

### Participants

Children born in a NSW hospital between June 1, 2000 and March 31, 2009 were followed from birth until their fifth birthday. Birth records were identified from the APDC dataset using the criteria of 'live born infant' (ICD-10-AM code Z38) in any diagnosis field. This birth cohort has been previously described.[18]

### Aboriginal status

Aboriginal status is routinely recorded in the APDC. The main analyses used an 'ever identified' algorithm that coded children as Aboriginal if they were ever identified as Aboriginal, yielding higher proportions of Aboriginal children compared to the most recent record or birth record (Supplement 1).[25] To test the sensitivity of this identification method, all analyses were repeated using Aboriginality defined solely on the child's birth record.

### Study variables



1  
2  
3 The main outcome was hospitalisation for unintentional poisoning, defined as an acute accidental  
4 exposure to, or overdose of, a toxic substance, whether accessed by a child or incorrectly administered by  
5 another person (wrong dosage, agent or frequency). The study focussed on ingested poisoning agents  
6 likely to require similar prevention approaches, including pharmaceutical (over-the-counter and  
7 prescription) and non-pharmaceutical agents, and excluding environmental exposures (Supplement 2).  
8 Poisoning cases were identified by a primary diagnosis of injury with an ICD-10-AM code T36-65,  
9 excluding toxic effect of metals (T56), carbon monoxide and other gases (T58-59) and noxious  
10 substances, venoms and food substances (T61-64).  
11  
12  
13  
14  
15

16 A poisoning admission was defined from the start date of an episode of care, to the date of separation or  
17 death. Multiple hospital admissions within a short time could be due to follow-up visits, transfer between  
18 hospitals, or change in care type within a hospital, related to the same poisoning event. Records falling  
19 within 75 days after the initial poisoning admission were excluded, based on the published 'clear zone'  
20 for poisoning.[26]  
21  
22  
23  
24

25 Available demographic variables included child's age, sex and area-level variables for socioeconomic  
26 disadvantage (Australian Bureau of Statistics Socioeconomic Indices for Areas (SEIFA) Index of Relative  
27 Socioeconomic Advantage and Disadvantage (IRSAD) [27]) and remoteness (Accessibility/Remoteness  
28 Index of Australia (ARIA) [28]) based on the child's statistical local area of residence at birth. Due to  
29 small numbers in some categories, IRSAD was divided into tertiles, and ARIA into four categories  
30 'Major Cities', 'Inner Regional', 'Outer Regional' and 'Remote/Very Remote' as used previously.[18]  
31 The age of first poisoning hospitalisation was analysed by single year intervals for Aboriginal and non-  
32 Aboriginal children.  
33  
34  
35  
36  
37

38 Poisoning agents were included if they were recorded in any diagnosis field (up to 50 fields). Clinical  
39 outcomes (repeat admissions, length of stay (LOS), procedures) were analysed for all poisoning  
40 admissions. LOS included the total number of hospital days related to the initial admission, and any  
41 subsequent admissions within 75 days. Procedures were classified at the 'block' level according to the  
42 Australian Classification for Health Interventions (ACHI), 8<sup>th</sup> edition.[29]  
43  
44  
45  
46

### 47 **Statistical analysis**

48

49 Differences in poisoning incidence were compared by demographic characteristics using chi squared  
50 tests, stratified by Aboriginality. The crude and adjusted odds of poisoning hospitalisation associated with  
51 demographic characteristics were estimated using logistic regression. Separate models were built for  
52 Aboriginal and non-Aboriginal children. Fully adjusted models included the variables sex, socioeconomic  
53 disadvantage and remoteness.  
54  
55  
56  
57  
58  
59  
60

1  
2  
3 Amongst children with a poisoning hospitalisation, incidence was examined by year of age. The classes  
4 of poisoning agents and the ten most common individual agents were examined across all poisoning  
5 admissions. Differences in poisoning agents (both classes and individual agents) by Aboriginality were  
6 tested using chi squared tests. The number and types of procedures and LOS were examined for all  
7 poisoning admissions, and compared by Aboriginality. Data was prepared with SAS Version 9.4 (SAS  
8 Institute) and analysed in Stata Version 14 (StataCorp).  
9  
10  
11

### 12 13 **Ethics Approval** 14

15 Ethics approval was granted by the New South Wales Population & Health Services Research Committee  
16 (2009/04/141) and the Aboriginal Health and Medical Research Council Committee (684/09).  
17  
18  
19  
20  
21  
22  
23  
24  
25  
26  
27  
28  
29  
30  
31  
32  
33  
34  
35  
36  
37  
38  
39  
40  
41  
42  
43  
44  
45  
46  
47  
48  
49  
50  
51  
52  
53  
54  
55  
56  
57  
58  
59  
60

## Results

### Study Population

The cohort included 767,119 children born in NSW between July 1, 2000 and March 31, 2009, of whom 28,528 (3.7%) were Aboriginal (Figure 2). From 2000-2014, there were 3,757 hospital admissions with a primary diagnosis of poisoning. Of these, 321 fell within the 75-day clear zone and were not analysed as new admissions. This left 3,436 poisoning admissions for 3,385 individual children, including 382 (11%) Aboriginal children. Aboriginal children were significantly overrepresented amongst children who had been poisoned ( $\chi^2=543.6$ ,  $p<0.001$ ).

### Demographic Characteristics

Poisoning admission by demographics characteristics for all children in the cohort are shown in Table 1. More Aboriginal than non-Aboriginal children lived in the most disadvantaged areas and in Remote or Very Remote areas. The proportion of children hospitalised for poisoning was higher for boys compared to girls, and increased with increasing socioeconomic disadvantage and increasing remoteness for both Aboriginal and non-Aboriginal children.

Incidence by one-year age intervals was similar amongst Aboriginal and non-Aboriginal children. Few Aboriginal or non-Aboriginal children had poisoning admissions at under one year of age (6%,  $n=21$  and 7%,  $n=220$  respectively) or older than four years (10%,  $n=40$  and 6%,  $n=174$ ). Poisoning admissions increased from the age of one (25%,  $n=96$  and 32%,  $n=952$ ), peaked at age two (40%,  $n=152$  and 40%,  $n=1,211$ ) and declined at age three years (19%,  $n=73$  and 15%,  $n=446$ ).

Crude and adjusted odds for poisoning hospitalisation for Aboriginal and non-Aboriginal children are shown in Figure 3. Male sex was significantly associated with increased risk of poisoning for both Aboriginal (adjusted odds ratio [aOR] 1.27, 95% CI 1.03-1.56) and non-Aboriginal children (aOR 1.17, 95% CI 1.09-1.26). Poisoning risk also increased with increasing socioeconomic disadvantage and increasing geographic remoteness. This trend was similar for both Aboriginal and non-Aboriginal children, although confidence intervals were wider for Aboriginal children.

**Table 1: Poisoning hospitalisations by demographic characteristics, Aboriginal and non-Aboriginal children, New South Wales, 2000-2014**

|                         | Aboriginal children |                    |      | Non-Aboriginal children |                    |        | All children   |                    |        |
|-------------------------|---------------------|--------------------|------|-------------------------|--------------------|--------|----------------|--------------------|--------|
|                         | N (column %)        | N poisoned (row %) | p    | N (column %)            | N poisoned (row %) | p      | N (column %)   | N poisoned (row %) | p      |
| Total                   | 28,528 (100)        | 382 (1.34)         |      | 738,591 (100)           | 3,003 (0.41)       |        | 767,119 (100)  | 3,385 (0.44)       |        |
| Sex                     |                     |                    | 0.03 |                         |                    | <0.001 |                |                    | <0.001 |
| Female                  | 13,472 (47.2)       | 159 (1.18)         |      | 358,899 (48.6)          | 1,342 (0.37)       |        | 372,371 (48.5) | 1,501 (0.40)       |        |
| Male                    | 15,056 (52.8)       | 223 (1.48)         |      | 379,692 (51.4)          | 1,661 (0.44)       |        | 394,748 (51.5) | 1,884 (0.48)       |        |
| Area-level disadvantage |                     |                    | 0.05 |                         |                    | <0.001 |                |                    | <0.001 |
| 1 - Most disadvantaged  | 18,857 (66.1)       | 259 (1.37)         |      | 241,835 (32.7)          | 1,315 (0.54)       |        | 260,692 (34.0) | 1,574 (0.60)       |        |
| 2                       | 7,558 (26.5)        | 107 (1.42)         |      | 250,639 (33.9)          | 1,003 (0.40)       |        | 258,197 (33.7) | 1,110 (0.43)       |        |
| 3 - Least Disadvantaged | 2,113 (7.4)         | 16 (0.76)          |      | 246,117 (33.3)          | 685 (0.28)         |        | 248,230 (32.4) | 701 (0.28)         |        |
| Remoteness              |                     |                    | 0.11 |                         |                    | <0.001 |                |                    | <0.001 |
| Major city              | 9,056 (31.7)        | 105 (1.16)         |      | 492,228 (66.6)          | 1,659 (0.34)       |        | 501,284 (65.3) | 1,764 (0.35)       |        |
| Inner regional          | 10,058 (35.3)       | 132 (1.31)         |      | 182,366 (24.7)          | 880 (0.48)         |        | 192,424 (25.1) | 1,012 (0.53)       |        |
| Outer regional          | 6,852 (24.0)        | 110 (1.61)         |      | 58,709 (7.9)            | 419 (0.71)         |        | 65,561 (8.5)   | 529 (0.81)         |        |
| Remote/Very Remote      | 2,562 (9.0)         | 35 (1.37)          |      | 5,288 (0.7)             | 45 (0.85)          |        | 7,850 (1.0)    | 80 (1.02)          |        |

P-values are from chi-squared tests, testing the null hypothesis that poisoning admissions are distributed equally across the levels of each covariate.

## Poisoning agents

Pharmaceutical agents caused most poisonings for both Aboriginal (83%) and non-Aboriginal (81%) children (Table 2). The leading classes of poisoning agents were similar by Aboriginality: nonopioid analgesic, antipyretic and antirheumatics (including paracetamol and ibuprofen); antiepileptic, sedative-hypnotic and antiparkinsonism medications; psychotropics; and cardiovascular medications (Table 2). Aboriginal children had a higher proportion of poisoning admissions from cardiovascular medications than non-Aboriginal children (14% and 11%,  $p=0.032$ ), whilst non-Aboriginal children had a higher proportion from nonopioid analgesic, antipyretic and antirheumatics (15% and 8%,  $p<0.001$ ) and autonomic nervous system medications (8% and 5%,  $p=0.048$ ).

Benzodiazepines (11%) and 4-aminophenol derivatives (paracetamol) (11%) were the two most common individual poisoning agents (Table 2). Together with other antihypertensives not elsewhere classified, they accounted for one in three poisoning admissions. Benzodiazepines and other antihypertensives not elsewhere classified were the two most common individual agents for Aboriginal children and caused a higher proportion of admissions for Aboriginal than non-Aboriginal children (benzodiazepines: 14% and 10%,  $p=0.025$ ; other antihypertensives not elsewhere classified: 10% and 6%,  $p=0.002$ ).

**Table 2: Poisoning agents by class and ten most frequent individual agents, for Aboriginal and Non-Aboriginal children, New South Wales, 2000-2014**

| ICD-10 Diagnosis Code                                                             | Total<br>N (%) | Aboriginal<br>N (%) | Non-Aboriginal<br>N (%) | p      |
|-----------------------------------------------------------------------------------|----------------|---------------------|-------------------------|--------|
| T36-65: All poisoning admissions                                                  | 3,436 (100)    | 391 (11)            | 3,045 (89)              |        |
| T36-50: Pharmaceutical <sup>a</sup>                                               | 2,859 (83)     | 318 (81)            | 2,541 (83)              | 0.291  |
| T51-65: Non-pharmaceutical <sup>a</sup>                                           | 588 (17)       | 76 (19)             | 512 (17)                | 0.195  |
| <b>Pharmaceutical Agents</b>                                                      |                |                     |                         |        |
| T36-37: Antibiotics, anti-infectives, anti-parasitics <sup>b</sup>                | 47 (1)         | 7 (2)               | 40 (1)                  | 0.445  |
| T38: Hormones and synthetic substitutes                                           | 141 (4)        | 22 (6)              | 119 (4)                 | 0.107  |
| T38.3: Insulin and oral hypoglycemic drugs                                        | 96 (3)         | 17 (4)              | 79 (3)                  | 0.048  |
| T39: Nonopioid analgesics, antipyretics and antirheumatics                        | 493 (14)       | 31 (8)              | 462 (15)                | <0.001 |
| T39.1: 4-aminophenol derivatives                                                  | 374 (11)       | 24 (6)              | 350 (11)                | 0.001  |
| T40 Narcotics and hallucinogens                                                   | 178 (5)        | 25 (6)              | 153 (5)                 | 0.25   |
| T41: Poisoning by anaesthetics and therapeutic gases                              | 14 (0)         | 0 (0)               | 14 (0)                  | 0.179  |
| T42: Antiepileptic, sedative-hypnotic and antiparkinsonism                        | 492 (14)       | 66 (17)             | 426 (14)                | 0.125  |
| T42.4: Benzodiazepines                                                            | 370 (11)       | 55 (14)             | 315 (10)                | 0.025  |
| T43: Psychotropic drugs, not elsewhere classified                                 | 394 (11)       | 55 (14)             | 339 (11)                | 0.087  |
| T43.2: Other and unspecified antidepressants                                      | 149 (4)        | 15 (4)              | 134 (4)                 | 0.606  |
| T44: Autonomic nervous system drugs                                               | 251 (7)        | 19 (5)              | 232 (8)                 | 0.048  |
| T44.3: Other parasympatholytics and spasmolytics, not elsewhere classified        | 93 (3)         | 7 (2)               | 86 (3)                  | 0.236  |
| T44.7: Beta adrenoreceptor antagonists, not elsewhere classified                  | 105 (3)        | 7 (2)               | 98 (3)                  | 0.122  |
| T45: Systemic and haematological agents                                           | 286 (8)        | 23 (6)              | 263 (9)                 | 0.063  |
| T45.0: Antiallergic and antiemetic drugs                                          | 150 (4)        | 14 (4)              | 136 (4)                 | 0.42   |
| T45.4: Iron and its compounds                                                     | 83 (2)         | <sup>c</sup>        | <sup>c</sup>            |        |
| T46: Cardiovascular system drugs                                                  | 382 (11)       | 56 (14)             | 326 (11)                | 0.032  |
| T46.5: Other antihypertensives, not elsewhere classified                          | 211 (6)        | 38 (10)             | 173 (6)                 | 0.002  |
| T47: Gastrointestinal system drugs                                                | 80 (2)         | 8 (2)               | 72 (2)                  | 0.694  |
| T48: Smooth and skeletal muscle and respiratory system agents                     | 98 (3)         | 6 (2)               | 92 (3)                  | 0.096  |
| T49: Topical agents and ophthalmological, otorhinolaryngological and dental drugs | 143 (4)        | 12 (3)              | 131 (4)                 | 0.25   |
| T50: Diuretics and other and unspecified drugs, medicaments and biological        | 207 (6)        | 22 (6)              | 185 (6)                 | 0.725  |

substances

|                                                                                 |              |                   |                       |          |
|---------------------------------------------------------------------------------|--------------|-------------------|-----------------------|----------|
| T50.9: Other and unspecified drugs, medicaments and biologicals                 | 94 (3)       | 10 (3)            | 84 (3)                | 0.819    |
| <b>Non-pharmaceutical agents</b>                                                |              |                   |                       |          |
| T51: Toxic effect of alcohol                                                    | 35 (1)       | 5 (1)             | 30 (1)                | 0.586    |
| T52: Toxic effect of organic solvents                                           | 185 (5)      | 22 (6)            | 163 (5)               | 0.822    |
| T53: Toxic effect of halogen derivatives of aliphatic and aromatic hydrocarbons | 10 (0)       | 0 (0)             | 10 (0)                | 0.256    |
| T54-55: Toxic effect of corrosive substances, soaps and detergents <sup>b</sup> | 132 (4)      | 17 (4)            | 115 (4)               | 0.58     |
| T57: Toxic effect of other inorganic substances                                 | 0 (0)        | 0 (0)             | 0 (0)                 |          |
| T60: Toxic effect of pesticides                                                 | 106 (3)      | 12 (3)            | 94 (3)                | 0.985    |
| T65: Toxic effect of other and unspecified substances                           | 124 (4)      | 21 (5)            | 103 (3)               | 0.047    |
| <b>ICD-10 Diagnosis Code</b>                                                    | <b>Total</b> | <b>Aboriginal</b> | <b>Non-Aboriginal</b> |          |
|                                                                                 | <b>N (%)</b> | <b>N (%)</b>      | <b>N (%)</b>          | <b>p</b> |
| T36-65: All poisoning admissions                                                | 3,436 (100)  | 391 (11)          | 3,045 (89)            |          |
| T36-50: Pharmaceutical*                                                         | 2,859 (83)   | 318 (81)          | 2,541 (83)            | 0.291    |
| T51-65: Non pharmaceutical*                                                     | 588 (17)     | 76 (19)           | 512 (17)              | 0.195    |
| <b>Pharmaceutical Agents</b>                                                    |              |                   |                       |          |
| T36-37: Antibiotics, anti-infectives, anti-parasitics**                         | 47 (1)       | 7 (2)             | 40 (1)                | 0.445    |
| T38: Hormones and synthetic substitutes                                         | 141 (4)      | 22 (6)            | 119 (4)               | 0.107    |
| T38.3: Insulin and oral hypoglycemic drugs                                      | 96 (3)       | 17 (4)            | 79 (3)                | 0.048    |
| T39: Nonopioid analgesics, antipyretics and antirheumatics                      | 493 (14)     | 31 (8)            | 462 (15)              | <0.001   |
| T39.1: 4-aminophenol derivatives                                                | 374 (11)     | 24 (6)            | 350 (11)              | 0.001    |
| T40 Narcotics and hallucinogens                                                 | 178 (5)      | 25 (6)            | 153 (5)               | 0.25     |
| T41: Poisoning by anaesthetics and therapeutic gases                            | 14 (0)       | 0 (0)             | 14 (0)                | 0.179    |
| T42: Antiepileptic, sedative-hypnotic and antiparkinsonism                      | 492 (14)     | 66 (17)           | 426 (14)              | 0.125    |
| T42.4: Benzodiazepines                                                          | 370 (11)     | 55 (14)           | 315 (10)              | 0.025    |
| T43: Psychotropic drugs, not elsewhere classified                               | 394 (11)     | 55 (14)           | 339 (11)              | 0.087    |
| T43.2: Other and unspecified antidepressants                                    | 149 (4)      | 15 (4)            | 134 (4)               | 0.606    |
| T44: Autonomic nervous system drugs                                             | 251 (7)      | 19 (5)            | 232 (8)               | 0.048    |
| T44.3: Other parasympatholytics and spasmolytics, not elsewhere classified      | 93 (3)       | 7 (2)             | 86 (3)                | 0.236    |
| T44.7: Beta adrenoreceptor antagonists, not elsewhere classified                | 105 (3)      | 7 (2)             | 98 (3)                | 0.122    |
| T45: Systemic and haematological agents                                         | 286 (8)      | 23 (6)            | 263 (9)               | 0.063    |
| T45.0: Antiallergic and antiemetic drugs                                        | 150 (4)      | 14 (4)            | 136 (4)               | 0.42     |

|                                                                                       |          |         |          |       |
|---------------------------------------------------------------------------------------|----------|---------|----------|-------|
| T45.4: Iron and its compounds                                                         | 83 (2)   | ***     | ***      |       |
| T46: Cardiovascular system drugs                                                      | 382 (11) | 56 (14) | 326 (11) | 0.032 |
| T46.5: Other antihypertensives, not elsewhere classified                              | 211 (6)  | 38 (10) | 173 (6)  | 0.002 |
| T47: Gastrointestinal system drugs                                                    | 80 (2)   | 8 (2)   | 72 (2)   | 0.694 |
| T48: Smooth and skeletal muscle and respiratory system agents                         | 98 (3)   | 6 (2)   | 92 (3)   | 0.096 |
| T49: Topical agents and ophthalmological, otorhinolaryngological and dental drugs     | 143 (4)  | 12 (3)  | 131 (4)  | 0.25  |
| T50: Diuretics and other and unspecified drugs, medicaments and biological substances | 207 (6)  | 22 (6)  | 185 (6)  | 0.725 |
| T50.9: Other and unspecified drugs, medicaments and biologicals                       | 94 (3)   | 10 (3)  | 84 (3)   | 0.819 |
| <b>Non pharmaceutical agents</b>                                                      |          |         |          |       |
| T51: Toxic effect of alcohol                                                          | 35 (1)   | 5 (1)   | 30 (1)   | 0.586 |
| T52: Toxic effect of organic solvents                                                 | 185 (5)  | 22 (6)  | 163 (5)  | 0.822 |
| T53: Toxic effect of halogen derivatives of aliphatic and aromatic hydrocarbons       | 10 (0)   | 0 (0)   | 10 (0)   | 0.256 |
| T54-55: Toxic effect of corrosive substances, soaps and detergents**                  | 132 (4)  | 17 (4)  | 115 (4)  | 0.58  |
| T57: Toxic effect of other inorganic substances                                       | 0 (0)    | 0 (0)   | 0 (0)    |       |
| T60: Toxic effect of pesticides                                                       | 106 (3)  | 12 (3)  | 94 (3)   | 0.985 |
| T65: Toxic effect of other and unspecified substances                                 | 124 (4)  | 21 (5)  | 103 (3)  | 0.047 |

<sup>a</sup> May exceed total number of poisoning admissions due to multiple agents per admission

<sup>b</sup> Categories combined due to small cell numbers

<sup>c</sup> Suppressed due to small cell numbers



### Clinical outcomes

Aboriginal and non-Aboriginal children had similar clinical outcomes in terms of repeat admissions, LOS and procedures (Table 3). There was one death from poisoning during the study period.

#### *Repeat admissions*

Fifty one children (1.5%) had a repeat poisoning admission. Of these, 42 were non-Aboriginal and 9 were Aboriginal. Due to small numbers, no further analysis of this group was undertaken.

#### *Length of stay*

Most children (91%) hospitalised for poisoning had a short LOS of  $\leq 1$  day. Excluding one outlier, LOS ranged from  $<1$  to 18 days. The distribution of LOS was similar for Aboriginal and non-Aboriginal children (Table 3,  $\chi^2=3.4147$ ,  $p=0.332$ ).

**Table 3: Clinical outcomes of Aboriginal and non-Aboriginal children with a poisoning hospitalisation, New South Wales, 2000-2014**

|                                                                | Aboriginal N (%) | Non-Aboriginal N (%) | Total N (%) |
|----------------------------------------------------------------|------------------|----------------------|-------------|
| Total number of poisoning admissions                           | 391 (100)        | 3,045 (100)          | 3,436 (100) |
| Repeat admissions                                              | 9 (2)            | 42 (1)               | 51 (1)      |
| Length of stay (days)                                          |                  |                      |             |
| <1                                                             | 125 (32)         | 1,085 (36)           | 1,210 (35)  |
| 1                                                              | 225 (58)         | 1,707 (56)           | 1,932 (56)  |
| 2                                                              | 25 (6)           | 158 (5)              | 183 (5)     |
| 3+                                                             | 16 (4)           | 95 (3)               | 111 (3)     |
| Total number of procedures                                     | 39 (10)          | 335 (11)             | 374 (11)    |
| Allied health interventions                                    | 27 (7)           | 233 (8)              | 260 (8)     |
| Airway and ventilation                                         | 5 (1)            | 32 (1)               | 37 (1)      |
| Other (including diagnostics and pharmacotherapy) <sup>a</sup> | 7 (2)            | 70 (2)               | 77 (2)      |

<sup>a</sup>Combined due to small cell numbers

#### *Procedures*

Most children hospitalised for poisoning had no recorded procedures (89%, 3,062/3,436) and this proportion was similar for Aboriginal and non-Aboriginal children. Of the 374 hospital admissions with a recorded procedure, the majority were allied health interventions, mostly a social worker consultation (8% of poisoning admissions).

### Sensitivity Analyses

1  
2  
3 Defining Aboriginal status based solely on the birth record reduced the number of children identified as  
4 Aboriginal in the study cohort (n=21,576, 2.8%), and amongst the cases with a poisoning admission  
5 (n=246, 7.2%). The other study findings remained similar.  
6  
7  
8  
9  
10  
11  
12  
13  
14  
15  
16  
17  
18  
19  
20  
21  
22  
23  
24  
25  
26  
27  
28  
29  
30  
31  
32  
33  
34  
35  
36  
37  
38  
39  
40  
41  
42  
43  
44  
45  
46  
47  
48  
49  
50  
51  
52  
53  
54  
55  
56  
57  
58  
59  
60

For peer review only

## Discussion

Compared with non-Aboriginal children, preschool Aboriginal children in NSW have almost three times the rate of hospitalised poisoning, but similar patterns of poisoning risk across available demographic factors, poisoning agents and clinical outcomes.

Amongst both Aboriginal and non-Aboriginal children, the incidence of hospitalised poisoning increased from age one, peaked at two to three years, and declined by four years, consistent with previous studies.[3, 5-8, 11] Male sex was a significant risk factor for both Aboriginal and non-Aboriginal children, consistent with findings from the general population [2, 3, 7, 16] and amongst Aboriginal children in NSW.[11, 21] Higher poisoning rates amongst boys may be due to earlier development of motor skills than risk perception.[5]

Poisoning risk increased with socioeconomic disadvantage and geographic remoteness amongst Aboriginal and non-Aboriginal children. Whilst these differences were not statistically significant amongst Aboriginal children, comparisons were limited by small subgroup sizes. Socioeconomic disadvantage is a well-established risk factor for unintentional injury [14, 30] and children from low-income backgrounds have a higher poisoning risk [13, 14, 31] due to more co-morbidities and medication usage, less access to childcare and storage equipment, and overcrowding.[31]

Higher poisoning hospitalisation rates in remote areas may suggest more children are being poisoned, but also that children presenting to rural hospitals are more likely to be admitted [4, 16] for reasons including distance from facilities, limited specialist services and delayed diagnostic tests.[23, 32]

There are several possible reasons for the disparity in hospitalised poisoning between Aboriginal and non-Aboriginal children. Aboriginal children disproportionately grow up in disadvantaged and remote areas. Aboriginal people have a higher burden of chronic disease, potentially exposing children to more medications. Overcrowding and poor housing disproportionately affects Aboriginal people and contributes to stress, poor supervision and health problems.[33] Higher levels of mobility amongst Aboriginal people [33] may expose children to medications belonging to different people in their own or other people's homes.

Pharmaceuticals, including adult and paediatric over-the-counter and prescription medications, are the leading causes of hospitalised unintentional poisonings amongst both Aboriginal and non-Aboriginal children. The leading classes of poisoning agents identified in this study—analgesic; psychotropic, antiepileptic, and sedative; and cardiovascular agents—are commonly prescribed medications in Australia. Benzodiazepines, 4-aminophenol derivatives (paracetamol) and other antihypertensives not

1  
2  
3 elsewhere classified (for example clonidine) accounted for almost one-third of all poisoning admissions.  
4 The rising use of prescription medications in Australia could be contributing towards unintentional  
5 poisonings amongst young children, as has been demonstrated in the United States, where childhood  
6 pharmaceutical poisonings have been associated with trends in adult medication prescriptions.[35] For  
7 example, benzodiazepines were the most common poisoning agent for Aboriginal children, similar to a  
8 previous report amongst Aboriginal and non-Aboriginal people in NSW.[21] Benzodiazepines are widely  
9 prescribed in Australia, often for anxiety and insomnia. Aboriginal people experience a higher burden of  
10 mental health issues [36] and higher rates of benzodiazepine poisoning amongst Aboriginal children may  
11 reflect higher adult usage, although we cannot confirm this using the available data.  
12  
13

14  
15  
16 The second most common poisoning agent for Aboriginal children in our study was other  
17 antihypertensives not elsewhere classified. In Australia, this largely includes clonidine, which is used for  
18 child behavioural disorders.[37] Aboriginal children, particularly those from disadvantaged backgrounds,  
19 have a higher risk of emotional or behavioural difficulties.[38, 39] Childhood clonidine poisoning has  
20 been found in other research to be often caused by a child accidentally ingesting clonidine belonging to  
21 another child such as an older sibling.[40]  
22  
23

24  
25  
26 Most children hospitalised for poisoning had a short LOS of  $\leq 1$  day and few required procedures,  
27 consistent with previous reports.[3, 23, 32] Allied health interventions were the most common procedure,  
28 yet fewer than one in ten poisoning hospitalisations had a recorded social worker consultation. Social  
29 workers can provide support to parents during a stressful hospitalisation, as well as injury prevention  
30 education when they are more likely to be receptive.[41] Low utilisation of this resource presents a lost  
31 opportunity for safety promotion. However, sensitivity is required around addressing parental guilt about  
32 their child's poisoning, especially among Aboriginal families, due to the effects of child removal and  
33 intergenerational trauma.[42]  
34  
35

### 36 37 38 39 40 41 **Strengths and Limitations**

42  
43  
44 This study's strengths include its focus on preschool-aged children, whole-of-population design and  
45 minimal recall bias using routinely collected administrative data. However, covariates were limited, and  
46 key risk factors (such as parent demographics, supervision, storage practices) and clinical information  
47 (such as time to presentation, symptoms, laboratory results, treatment details) were unavailable. The use  
48 of an area-level index for socioeconomic status may introduce ecological bias.  
49  
50

51  
52 The under-identification of Aboriginal children in Australian public hospital data can affect estimates of  
53 health outcomes.[25] This study used an 'ever-identified' algorithm for children recorded at least once as  
54 Aboriginal, demonstrated to enhance the proportion of Aboriginal children.[25] This may introduce bias  
55  
56  
57  
58  
59

1  
2  
3 because sicker children with more frequent hospitalisations have more opportunities for identification.  
4 However, results of the sensitivity analyses indicated that identification did not alter the main  
5 conclusions.  
6  
7

8 Hospital admissions represent only a fraction of poisonings. Our study does not reflect the complete  
9 spectrum of early childhood poisoning incidents, but captures the most severe hospitalised cases with the  
10 largest impact on children and health services.  
11  
12

13 Finally, our analysis of poisoning agents was limited to the ICD-10 taxonomy. In some circumstances it  
14 was not possible to determine specific agents, for example, 'other' categories.  
15  
16

### 17 **Implications for practice and prevention**

18  
19 Safe packaging and storage are key to childhood poisoning prevention. Child resistant packaging for  
20 medications was introduced in Australia under the *Therapeutic Goods Act 1989*.<sup>[43]</sup> However, child  
21 resistant closures for medications are not always consistently used <sup>[32]</sup> and many adult medications are  
22 kept in non-reclosable packaging that children can access. Limitations in packaging design should be  
23 improved for adult medications as well as child medications.  
24  
25  
26  
27

28 Unsafe storage also increases poisoning risk.<sup>[15]</sup> Aboriginal families and low-income families may face  
29 barriers in promoting safe storage due to costs of safety equipment and prohibitions on home installations  
30 in public housing or rental properties.<sup>[44, 45]</sup> Providing low cost or free equipment can improve  
31 household storage practices, particularly with education and fitting assistance.<sup>[46]</sup> Reducing poisoning  
32 rates requires combined strategies of household storage interventions, accessible poisons information  
33 centres, and enforcement of packaging legislation.<sup>[47]</sup>  
34  
35  
36  
37

38 No known injury prevention programs have specifically addressed unintentional poisoning in Aboriginal  
39 communities.<sup>[48]</sup> The 'Safe Homes Safe Kids' program provided home safety education and devices to  
40 Aboriginal families in the Illawarra region of NSW.<sup>[47]</sup> Future research involving community  
41 consultation is needed to address poisoning prevention in Aboriginal communities, considering factors  
42 such as poverty, trauma, housing, and family separation.<sup>[49]</sup>  
43  
44  
45  
46  
47  
48  
49  
50  
51  
52  
53  
54  
55  
56  
57  
58  
59  
60

## Conclusion

Unintentional poisoning is most prevalent amongst preschool-aged children, and disproportionately affects Aboriginal children. This study confirmed the inequity in hospitalised poisonings between Aboriginal and non-Aboriginal children, and demonstrated that adult and child medications commonly used in the general population contribute to poisonings amongst both groups. With a rising prevalence of chronic disease and increases in prescription medication use amongst both Aboriginal people and the wider community, keeping children safe from unintentional poisoning should be a priority. Further research and policy development is needed to investigate culturally safe prevention strategies that include improved packaging, safe storage and education about medication toxicity.

## Funding

This work was supported by the Australian National Health and Medical Research Council (573113).

## Contributions

CL, SW, LJ, and MH contributed to the conception and design of the study, including the research questions and the analysis. CL wrote each drafts, and together with MH, produced the tables and figures. LJ, SW and MH provided technical and moral support throughout the study. All authors contributed to the drafting of the work, approval of the final manuscript, and critical interpretation of its findings, with particular contributions from KZ, SW and NL regarding the translation of findings with other stakeholders for prevention.

## Acknowledgements

The authors wish to thank Dr Holger Moller who prepared the dataset prior to the study period; this study builds upon knowledge generated by his previous research. The authors also wish to thank Professor Nicholas Buckley, Dr Jane Bell, Dr Ruth Barker and Professor Sallie Pearson for their assistance in the interpretation of poisoning agents; and Professor Rebecca Ivers, Professor Kathleen Clapham, and Dr Kathleen Falster for consultation about translating the research findings for policy and practice.

## Competing Interests

None declared

## Funding

Australian National Health and Medical Research Council (573113)

**Data sharing statement:** no additional data are available.

**Patient and public involvement:** patients were not directly involved in the development of the research question, outcome measures or study design. All patient data was de-identified prior to analysis. Results were presented at a public Aboriginal community health forum in La Perouse, Sydney, Australia, attended by health providers and community members. Results were also presented at an international injury prevention conference attended by policymakers and researchers, and to the Board of Kidsafe Australia. A patient information poster will be developed and presented to Kidsafe Board.

1  
2  
3 **Figure 1:** Indigenous Health Outcomes Patient Evaluation (IHOPE) data sources and linkage  
4

5 **Figure 2:** Flow diagram showing process of cohort selection  
6

7 **Figure 3:** Crude and adjusted odds ratios with 95% confidence intervals for poisoning hospitalisation, by  
8 demographic factors, Aboriginal and non-Aboriginal children, New South Wales, 2000-2014. Legend:  
9 OR: odds ratio, aOR: adjusted odds ratio, CI: confidence interval. Fully adjusted models included  
10 variables sex, area-level disadvantage, and geographic remoteness  
11  
12  
13  
14  
15  
16  
17  
18  
19  
20  
21  
22  
23  
24  
25  
26  
27  
28  
29  
30  
31  
32  
33  
34  
35  
36  
37  
38  
39  
40  
41  
42  
43  
44  
45  
46  
47  
48  
49  
50  
51  
52  
53  
54  
55  
56  
57  
58  
59  
60



## References

1. World Health Organization. World report on child injury prevention. Switzerland: World Health Organization; 2008. Report No.: 9241563575.
2. Reith D, Pitt W, Hockey R. Childhood poisoning in Queensland: an analysis of presentation and admission rates. *Journal of paediatrics and child health*. 2001;37(5):446-50.
3. Cripps R, Steel D. Childhood poisoning in Australia. South Australia: AIHW National Injury Surveillance Unit, Flinders University; 2006.
4. Tovell A, McKenna K, Bradley C, Pointer S. Hospital separations due to injury and poisoning, Australia 2009-10. Canberra: Australian Institute of Health and Welfare; 2012. Report No.: Cat. no. INJCAT 145.
5. Schmertmann M, Williamson A, Black D. Stable age pattern supports role of development in unintentional childhood poisoning. *Injury Prevention*. 2008;14(1):30-3.
6. Agran PF, Anderson C, Winn D, Trent R, Walton-Haynes L, Thayer S. Rates of pediatric injuries by 3-month intervals for children 0 to 3 years of age. *Pediatrics*. 2003;111(6 Pt 1):e683-92.
7. Hoy J, Day L, Tibballs J, Ozanne-Smith J. Unintentional poisoning hospitalisations among young children in Victoria. *Injury Prevention*. 1999;5(1):31-5.
8. Tyrrell EG, Orton E, Tata LJ, Kendrick D. Children at risk of medicinal and non-medicinal poisoning: a population-based case-control study in general practice. *British Journal of General Practice*. 2012;62(605):e827-33.
9. Rodgers GB, Franklin RL, Midgett JD. Unintentional paediatric ingestion poisonings and the role of imitative behaviour. *Injury Prevention*. 2012;18(2):103.
10. Lam LT. Childhood and adolescence poisoning in NSW, Australia: an analysis of age, sex, geographic, and poison types. *Injury Prevention*. 2003;9(4):338-42.
11. Moller H, Falster K, Ivers R, Falster MO, Clapham K, Jorm L. Closing the Aboriginal child injury gap: targets for injury prevention. *Australian and New Zealand Journal of Public Health*. 2017;41(1):8-14.
12. Australian Institute of Health and Welfare (AIHW): Pointer S. Hospitalised injuries in Aboriginal and Torres Strait Islander children and young people 2011-13. Canberra: AIHW; 2016. Report No.: Cat no. INJCAT 172.
13. Orton E, Kendrick D, West J, Tata LJ. Independent risk factors for injury in pre-school children: three population-based nested case-control studies using routine primary care data. *PloS one*. 2012;7(4):e35193.
14. Laursen B, Nielsen JW. Influence of sociodemographic factors on the risk of unintentional childhood home injuries. *European journal of public health*. 2008;18(4):366-70.

15. Kendrick D, Majsak-Newman G, Benford P, Coupland C, Timblin C, Hayes M, et al. Poison prevention practices and medically attended poisoning in young children: multicentre case-control study. *Injury Prevention*. 2017;23(2):93.
16. O'Connor P. Differentials in poisoning rates of young Australian children according to residential location and geographical remoteness. *Injury Prevention*. 2005;11(4):204-6.
17. Moller H, Falster K, Ivers R, Jorm L. Inequalities in unintentional injuries between indigenous and non-indigenous children: a systematic review. *Injury Prevention*. 2015;21(e1):e144-52.
18. Moller H, Falster K, Ivers R, Falster M, Randall D, Clapham K, et al. Inequalities in Hospitalized Unintentional Injury Between Aboriginal and Non-Aboriginal Children in New South Wales, Australia. *American Journal of Public Health*. 2016;106(5):899-905.
19. Alaghebandan R, Sikdar KC, MacDonald D, Collins KD, Rossignol AM. Unintentional injuries among children and adolescents in Aboriginal and non-Aboriginal communities, Newfoundland and Labrador, Canada. *International Journal of Circumpolar Health*. 2010;69(1):61-71.
20. Johnson SI, Sullivan M, Grossman DC. Hospitalizations for injury among American Indian youth in Washington. *Western Journal of Medicine*. 1999;171(1):10-4.
21. Walter S. Mortality and hospitalisation due to injury in the Aboriginal population of New South Wales. North Sydney, Australia: New South Wales Department of Health. 2010.
22. Schmetzmann M, Williamson A, Black D, Wilson L. Risk factors for unintentional poisoning in children aged 1-3 years in NSW Australia: a case-control study. *BMC pediatrics*. 2013;13:88.
23. Cheng DR, Ip CCK. Unintentional paediatric poisoning in rural Victoria: Incidence and admission rates. *Australian journal of rural health*. 2012;20(6):339-43.
24. Australian Bureau of Statistics. Census of Population and Housing - Counts of Aboriginal and Torres Strait Islander Australians, 2011 2012. [updated 30 August 2017. Available from: <http://www.abs.gov.au/ausstats/abs@.nsf/lookup/2075.0main+features32011>.
25. Gialamas A, Pilkington R, Berry J, Scalzi D, Gibson O, Brown A, et al. Identification of Aboriginal children using linked administrative data: Consequences for measuring inequalities. *Journal of paediatrics and child health*. 2016;52(5):534-40.
26. Lestina DC, Miller TR, Smith GS. Creating injury episodes using medical claims data. *Journal of Trauma and Acute Care Surgery*. 1998;45(3):565-9.
27. Australian Bureau of Statistics. Socio-Economic Indexes for Areas. [updated September 2013. Available from: <http://www.abs.gov.au/websitedbs/censushome.nsf/home/seifas>.
28. Australian Bureau of Statistics. Remoteness Structure. [Available from: <http://www.abs.gov.au/websitedbs/D3310114.nsf/home/remoteness+structure>.

- 1
  - 2
  - 3
  - 4
  - 5
  - 6
  - 7
  - 8
  - 9
  - 10
  - 11
  - 12
  - 13
  - 14
  - 15
  - 16
  - 17
  - 18
  - 19
  - 20
  - 21
  - 22
  - 23
  - 24
  - 25
  - 26
  - 27
  - 28
  - 29
  - 30
  - 31
  - 32
  - 33
  - 34
  - 35
  - 36
  - 37
  - 38
  - 39
  - 40
  - 41
  - 42
  - 43
  - 44
  - 45
  - 46
  - 47
  - 48
  - 49
  - 50
  - 51
  - 52
  - 53
  - 54
  - 55
  - 56
  - 57
  - 58
  - 59
  - 60
29. Australian Institute of Health and Welfare. Australian Classification of Health Interventions (ACHI) 8th edition. [Available from: <http://meteor.aihw.gov.au/content/index.phtml/itemId/514008>.
30. Birken CS, MacArthur C. Socioeconomic status and injury risk in children. *Paediatrics & Child Health*. 2004;9(5):323-5.
31. Groom L, Kendrick D, Coupland C, Patel B, Hippisley-Cox J. Inequalities in hospital admission rates for unintentional poisoning in young children. *Injury Prevention*. 2006;12(3):166-70.
32. Sherrard J, Sweidan M, Robinson J, Killian J, Brennan C, Ozanne-Smith J. Barriers to child poisoning prevention: Why does child resistant packaging fail? Melbourne: Monash University Accident Research Centre; 2005.
33. Bailie RS, Wayte KJ. Housing and health in Indigenous communities: Key issues for housing and health improvement in remote Aboriginal and Torres Strait Islander communities. *Australian Journal of Rural Health*. 2006;14(5):178-83.
34. Pharmaceutical Benefits Advisory Committee. Australian Statistics on Medicines 2015. Australia: Pharmaceutical Benefits Scheme; 2015.
35. Burghardt LC, Ayers JW, Brownstein JS, Bronstein AC, Ewald MB, Bourgeois FT. Adult prescription drug use and pediatric medication exposures and poisonings. *Pediatrics*. 2013;132(1):18-27.
36. Jorm AF, Bouchier SJ, Cvetkovski S, Stewart G. Mental health of Indigenous Australians: a review of findings from community surveys. *Medical Journal of Australia*. 2012;196(2):118.
37. Australian Medicines Handbook Adelaide: Australian Medicines Handbook Pty Ltd; 2017. [Available from: <https://amhonline.amh.net.au/>.
38. Zubrick S, Lawrence D, Silburn S, Blair E, Milroy H, Wilkes E, et al. The Western Australian Aboriginal child health survey: The health of Aboriginal children and young people: Telethon Institute for Child Health Research; 2004.
39. Shepherd CCJ, Li J, Mitrou F, Zubrick SR. Socioeconomic disparities in the mental health of Indigenous children in Western Australia. *BMC Public Health*. 2012;12:756-.
40. Sinha Y, Cranswick NE. Clonidine poisoning in children: a recent experience. *Journal of paediatrics and child health*. 2004;40(12):678-80.
41. Zonfrillo MR, Melzer-Lange M, Gittelman MA. A comprehensive approach to pediatric injury prevention in the emergency department. *Pediatric emergency care*. 2014;30(1):56-62.
42. Bennett B, Zubrzycki J, Bacon V. What Do We Know? The Experiences of Social Workers Working Alongside Aboriginal People. *Australian Social Work*. 2011;64(1):20-37.
43. Therapeutic Goods Order No. 80 - Child-Resistant Packaging Requirements for Medicines (27/08/2008), (2008).

- 1  
2  
3 44. Smithson J, Garside R, Pearson M. Barriers to, and facilitators of, the prevention of unintentional  
4 injury in children in the home: a systematic review and synthesis of qualitative research. *Injury*  
5 *Prevention*. 2011;17(2):119-26.  
6  
7 45. Gibbs L, Waters E, Sherrard J, Ozanne-Smith J, Robinson J, Young S, et al. Understanding  
8 parental motivators and barriers to uptake of child poison safety strategies: a qualitative study. *Injury*  
9 *Prevention*. 2005;11(6):373-7.  
10  
11 46. Achana FA, Sutton AJ, Kendrick D, Wynn P, Young B, Jones DR, et al. The Effectiveness of  
12 Different Interventions to Promote Poison Prevention Behaviours in Households with Children: A  
13 Network Meta-Analysis. *PloS one*. 2015;10(4):e0121122.  
14  
15 47. Adams S, Elkington J, MacKay JM, K Z, O'Sullivan M, Vincenten K, et al. Child Safety Good  
16 Practice Guide: good investments in unintentional child injury prevention and safety promotion. Sydney:  
17 Sydney Children's Hospitals Network; 2016.  
18  
19 48. Senserrick T, Hinchcliff R, Ivers R, Boufous S, Martiniuk A, Clapham K. Aboriginal Injury  
20 Prevention Projects: A Rapid Review. Ultimo, Australia: Sax Institute for NSW Health and the George  
21 Institute. 2010.  
22  
23 49. Ivers R, Clapham K, Senserrick T, Lyford M, Stevenson M. Injury prevention in Australian  
24 Indigenous communities. *Injury*. 2008;39(Supplement 5):S61-S7.  
25  
26  
27  
28  
29  
30  
31  
32  
33  
34  
35  
36  
37  
38  
39  
40  
41  
42  
43  
44  
45  
46  
47  
48  
49  
50  
51  
52  
53  
54  
55  
56  
57  
58  
59  
60

1  
2  
3  
4  
5  
6  
7  
8  
9  
10  
11  
12  
13  
14  
15  
16  
17  
18  
19  
20  
21  
22  
23  
24  
25  
26  
27  
28  
29  
30  
31  
32  
33  
34  
35  
36  
37  
38  
39  
40  
41  
42  
43  
44  
45  
46  
47  
48  
49  
50  
51  
52  
53  
54  
55  
56  
57  
58  
59  
60

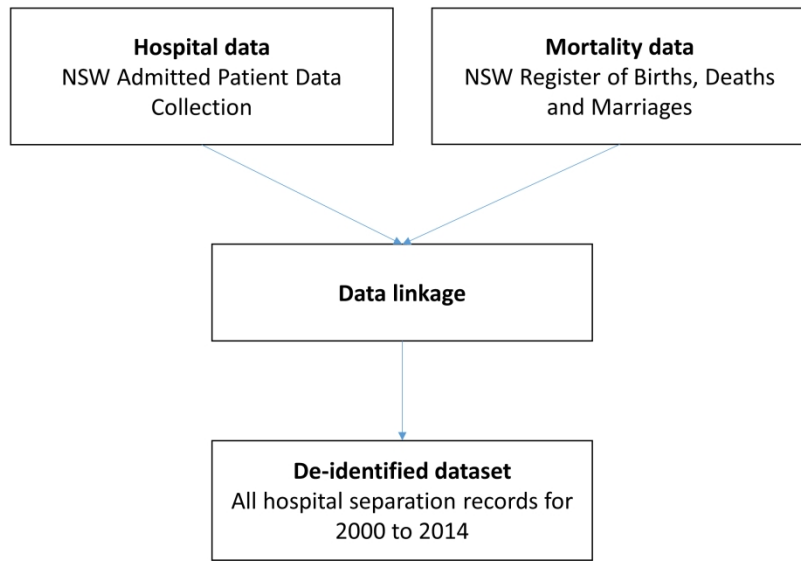

Figure 1: Indigenous Health Outcomes Patient Evaluation (IHOPE) data sources and linkage  
254x190mm (300 x 300 DPI)

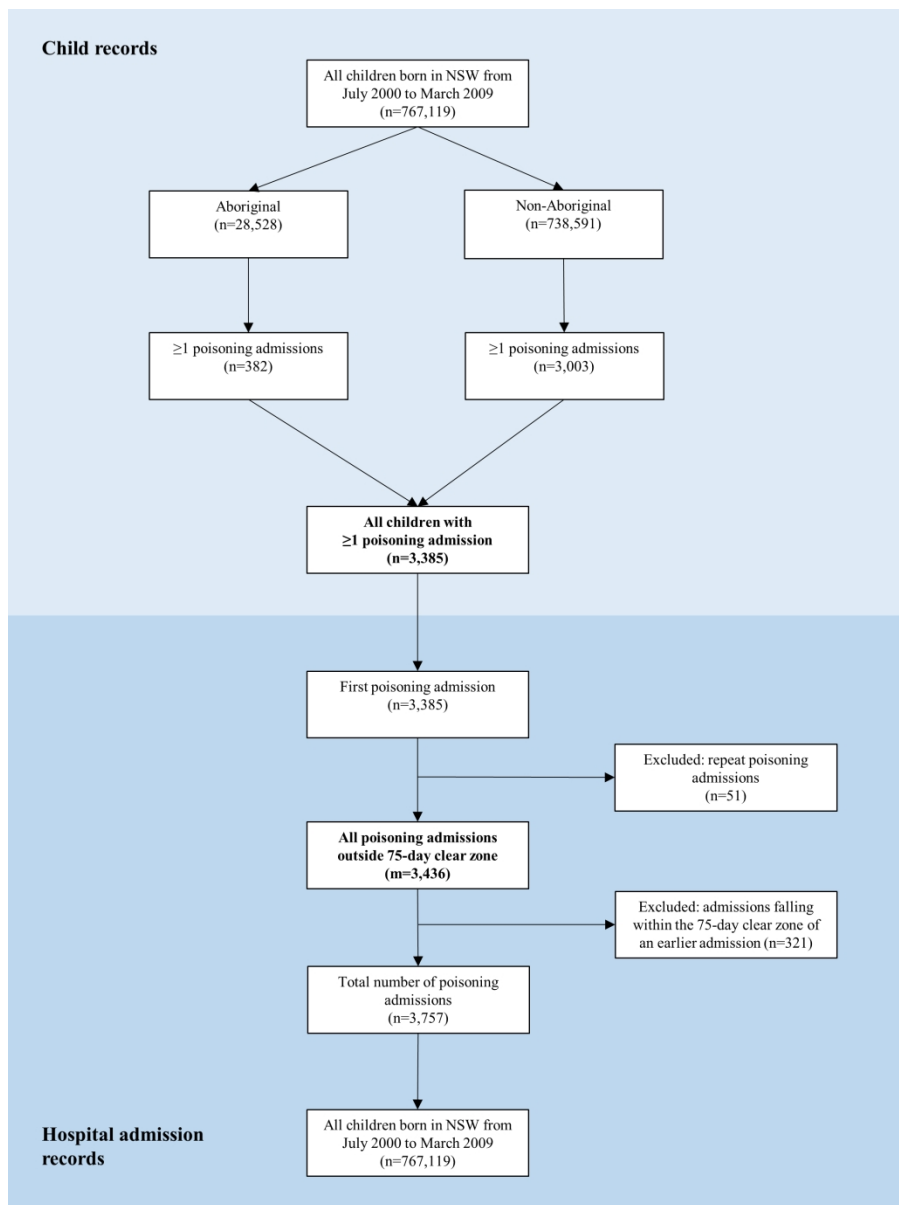

Figure 2: Flow diagram with process of cohort selection

190x254mm (300 x 300 DPI)

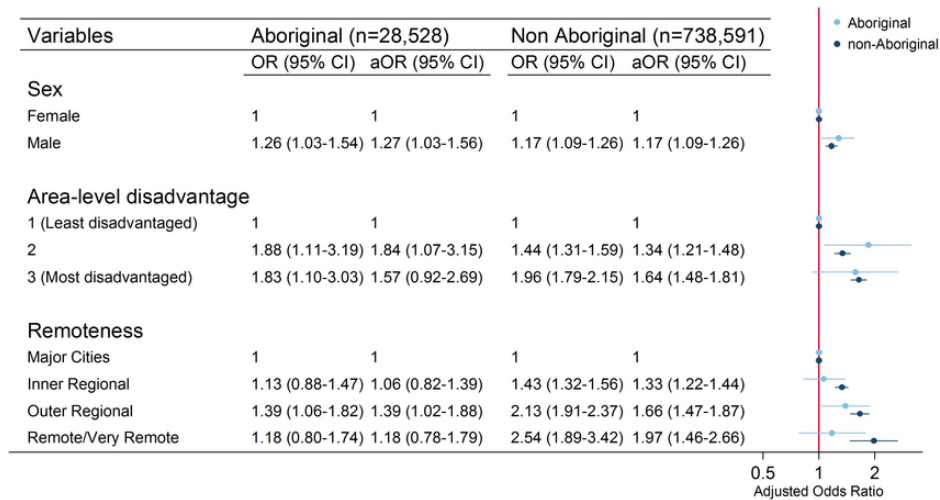

Figure 3: Crude and adjusted odds ratios with 95% confidence intervals for poisoning hospitalisation, by demographic factors, Aboriginal and non-Aboriginal children, New South Wales, 2000-2014. Legend: OR: odds ratio, aOR: adjusted odds ratio, CI: confidence interval. Fully adjusted models included variables sex, area-level disadvantage, and geographic remoteness

38x21mm (600 x 600 DPI)

1  
2  
3 **Supplement 1: Number of Aboriginal children identified, by identification method**  
4  
5

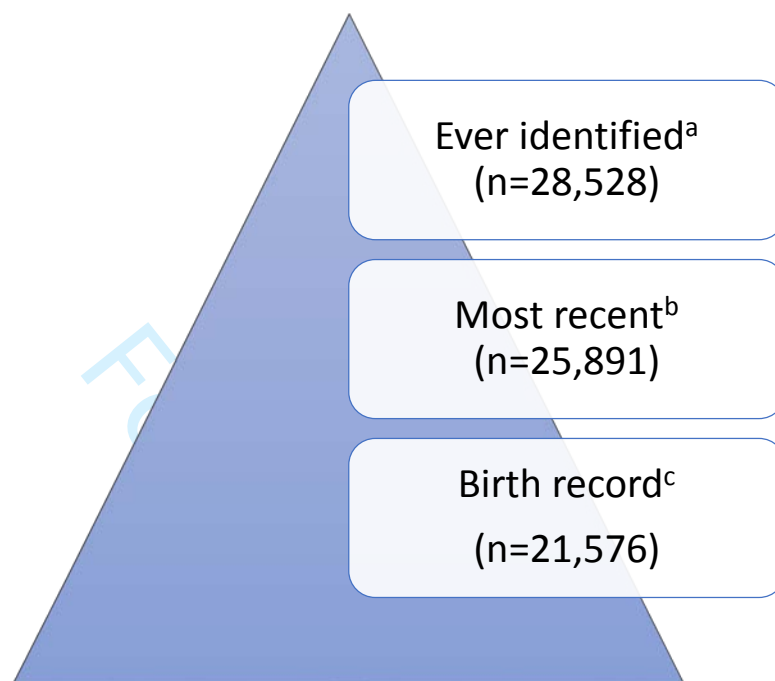

28 <sup>a</sup> Child identified as Aboriginal in any APDC record between their birth and fifth birthday

29 <sup>b</sup> Child identified as Aboriginal in the most recent APDC record between their birth and fifth birthday

30 <sup>c</sup> Child identified as Aboriginal in their APDC birth record  
31  
32  
33  
34  
35  
36  
37  
38  
39  
40  
41  
42  
43  
44  
45  
46  
47  
48  
49  
50  
51  
52  
53  
54  
55  
56  
57  
58  
59  
60



**Supplement 2: Included and excluded poisoning agents, by ICD-10-AM code**

---

**Included agents**

---

*Pharmaceutical Agents*

- T36: Poisoning by systemic antibiotics
- T37: Poisoning by other systemic anti-infectives and antiparasitics
- T38: Poisoning by hormones and their synthetic substitutes and antagonists, not elsewhere classified
- T39: Poisoning by nonopioid analgesics, antipyretics and antirheumatics
- T40: Poisoning by narcotics and psychodysleptics [hallucinogens]
- T41: Poisoning by anaesthetics and therapeutic gases
- T42: Poisoning by antiepileptic, sedative-hypnotic and antiparkinsonism drugs
- T43: Poisoning by psychotropic drugs, not elsewhere classified
- T44: Poisoning by drugs primarily affecting the autonomic nervous system
- T45: Poisoning by primarily systemic and haematological agents, not elsewhere classified
- T46: Poisoning by agents primarily affecting the cardiovascular system
- T47: Poisoning by agents primarily affecting the gastrointestinal system
- T48: Poisoning by agents primarily acting on smooth and skeletal muscle and respiratory system
- T49: Poisoning by topical agents primarily affecting skin and mucosal membrane and by ophthalmological, otorhinolaryngological and dental drugs
- T50: Diuretics and other and unspecified drugs, medicaments and biological substances

---

*Non pharmaceutical agents*

- T51: Toxic effect of alcohol
- T52: Toxic effect of organic solvents
- T53: Toxic effect of halogen derivatives of aliphatic and aromatic hydrocarbons
- T54: Toxic effect of corrosive substances
- T55: Toxic effect of soaps and detergents
- T57: Toxic effect of other inorganic substances
- T60: Toxic effect of pesticides
- T65: Toxic effect of other and unspecified substances

---

**Excluded agents**

---

- T56: Toxic effect of metals (*includes lead, mercury*)
- T58: Toxic effect of carbon monoxide
- T59: Toxic effect of other gases, fumes and vapours
- T61: Toxic effect of noxious substances eaten as food (*includes fish, shellfish*)
- T62: Toxic effect of other noxious substances eaten as food (*includes mushrooms, berries*)
- T63: Toxic effect of contact with venomous animals
- T64: Toxic effect of aflatoxin and other mycotoxins
-

## STROBE Statement—checklist of items that should be included in reports of observational studies

|                           | Item No | Recommendation                                                                                                                                                                                                                                                                                                                                                                                                                                                         | Completed (page)                                                                                                                                                                                    |
|---------------------------|---------|------------------------------------------------------------------------------------------------------------------------------------------------------------------------------------------------------------------------------------------------------------------------------------------------------------------------------------------------------------------------------------------------------------------------------------------------------------------------|-----------------------------------------------------------------------------------------------------------------------------------------------------------------------------------------------------|
| <b>Title and abstract</b> | 1       | (a) Indicate the study's design with a commonly used term in the title or the abstract                                                                                                                                                                                                                                                                                                                                                                                 | Yes (2)                                                                                                                                                                                             |
|                           |         | (b) Provide in the abstract an informative and balanced summary of what was done and what was found                                                                                                                                                                                                                                                                                                                                                                    | Yes (2)                                                                                                                                                                                             |
| <b>Introduction</b>       |         |                                                                                                                                                                                                                                                                                                                                                                                                                                                                        |                                                                                                                                                                                                     |
| Background/rationale      | 2       | Explain the scientific background and rationale for the investigation being reported                                                                                                                                                                                                                                                                                                                                                                                   | Yes (4)                                                                                                                                                                                             |
| Objectives                | 3       | State specific objectives, including any prespecified hypotheses                                                                                                                                                                                                                                                                                                                                                                                                       | Yes (4)                                                                                                                                                                                             |
| <b>Methods</b>            |         |                                                                                                                                                                                                                                                                                                                                                                                                                                                                        |                                                                                                                                                                                                     |
| Study design              | 4       | Present key elements of study design early in the paper                                                                                                                                                                                                                                                                                                                                                                                                                | Yes (6)                                                                                                                                                                                             |
| Setting                   | 5       | Describe the setting, locations, and relevant dates, including periods of recruitment, exposure, follow-up, and data collection                                                                                                                                                                                                                                                                                                                                        | Yes (6)                                                                                                                                                                                             |
| Participants              | 6       | (a) <i>Cohort study</i> —Give the eligibility criteria, and the sources and methods of selection of participants. Describe methods of follow-up<br><i>Case-control study</i> —Give the eligibility criteria, and the sources and methods of case ascertainment and control selection. Give the rationale for the choice of cases and controls<br><i>Cross-sectional study</i> —Give the eligibility criteria, and the sources and methods of selection of participants | Cohort study:<br>Eligibility criteria and methods of selection included (6)                                                                                                                         |
|                           |         | (b) <i>Cohort study</i> —For matched studies, give matching criteria and number of exposed and unexposed<br><i>Case-control study</i> —For matched studies, give matching criteria and the number of controls per case                                                                                                                                                                                                                                                 |                                                                                                                                                                                                     |
| Variables                 | 7       | Clearly define all outcomes, exposures, predictors, potential confounders, and effect modifiers. Give diagnostic criteria, if applicable                                                                                                                                                                                                                                                                                                                               | Outcomes, exposures, predictors (logistic regression model, demographic predictor variables) ICD-10 diagnostic codes described (full list of included/excluded codes available in Supplement 2) (7) |
| Data sources/measurement  | 8*      | For each variable of interest, give sources of data and details of methods of assessment (measurement). Describe comparability of assessment methods if there is more than one group                                                                                                                                                                                                                                                                                   | Yes (6)                                                                                                                                                                                             |
| Bias                      | 9       | Describe any efforts to address potential sources of bias                                                                                                                                                                                                                                                                                                                                                                                                              | “Clear zone” method used to reduce potential overcounting of                                                                                                                                        |

|                        |    |                                                                                                                              |                                                               |
|------------------------|----|------------------------------------------------------------------------------------------------------------------------------|---------------------------------------------------------------|
|                        |    |                                                                                                                              | hospital admissions related to same incident presentation (7) |
| Study size             | 10 | Explain how the study size was arrived at                                                                                    | (9)                                                           |
| Quantitative variables | 11 | Explain how quantitative variables were handled in the analyses. If applicable, describe which groupings were chosen and why |                                                               |
| Statistical methods    | 12 | (a) Describe all statistical methods, including those used to control for confounding                                        | Yes (7-8)                                                     |
|                        |    | (b) Describe any methods used to examine subgroups and interactions                                                          |                                                               |
|                        |    | (c) Explain how missing data were addressed                                                                                  | All model covariates were fully observed                      |
|                        |    | (d) <i>Cohort study</i> —If applicable, explain how loss to follow-up was addressed                                          |                                                               |
|                        |    | (e) <i>Case-control study</i> —If applicable, explain how matching of cases and controls was addressed                       |                                                               |
|                        |    | <i>Cross-sectional study</i> —If applicable, describe analytical methods taking account of sampling strategy                 |                                                               |
|                        |    | (g) Describe any sensitivity analyses                                                                                        | Yes (16)                                                      |

Continued on next page

| <b>Results</b>           |     |                                                                                                                                                                                                              |                                                               |
|--------------------------|-----|--------------------------------------------------------------------------------------------------------------------------------------------------------------------------------------------------------------|---------------------------------------------------------------|
| Participants             | 13* | (a) Report numbers of individuals at each stage of study—eg numbers potentially eligible, examined for eligibility, confirmed eligible, included in the study, completing follow-up, and analysed            | Yes (9)                                                       |
|                          |     | (b) Give reasons for non-participation at each stage                                                                                                                                                         | N/A                                                           |
|                          |     | (c) Consider use of a flow diagram                                                                                                                                                                           | Yes                                                           |
| Descriptive data         | 14* | (a) Give characteristics of study participants (eg demographic, clinical, social) and information on exposures and potential confounders                                                                     | Yes (Table 1) (9)                                             |
|                          |     | (b) Indicate number of participants with missing data for each variable of interest                                                                                                                          | N/A                                                           |
|                          |     | (c) <i>Cohort study</i> —Summarise follow-up time (eg, average and total amount)                                                                                                                             | Yes (9)                                                       |
| Outcome data             | 15* | <i>Cohort study</i> —Report numbers of outcome events or summary measures over time                                                                                                                          | Yes (9)                                                       |
|                          |     | <i>Case-control study</i> —Report numbers in each exposure category, or summary measures of exposure                                                                                                         |                                                               |
|                          |     | <i>Cross-sectional study</i> —Report numbers of outcome events or summary measures                                                                                                                           |                                                               |
| Main results             | 16  | (a) Give unadjusted estimates and, if applicable, confounder-adjusted estimates and their precision (eg, 95% confidence interval). Make clear which confounders were adjusted for and why they were included | Unadjusted and adjusted odds ratios presented with 95% CI (9) |
|                          |     | (b) Report category boundaries when continuous variables were categorized                                                                                                                                    | N/A                                                           |
|                          |     | (c) If relevant, consider translating estimates of relative risk into absolute risk for a meaningful time period                                                                                             | N/A                                                           |
| Other analyses           | 17  | Report other analyses done—eg analyses of subgroups and interactions, and sensitivity analyses                                                                                                               | Sensitivity analyses described (16)                           |
| <b>Discussion</b>        |     |                                                                                                                                                                                                              |                                                               |
| Key results              | 18  | Summarise key results with reference to study objectives                                                                                                                                                     | Yes (17)                                                      |
| Limitations              | 19  | Discuss limitations of the study, taking into account sources of potential bias or imprecision. Discuss both direction and magnitude of any potential bias                                                   | Limitations described (18)                                    |
| Interpretation           | 20  | Give a cautious overall interpretation of results considering objectives, limitations, multiplicity of analyses, results from similar studies, and other relevant evidence                                   | Yes (17)                                                      |
| Generalisability         | 21  | Discuss the generalisability (external validity) of the study results                                                                                                                                        | Implications of study findings described (19)                 |
| <b>Other information</b> |     |                                                                                                                                                                                                              |                                                               |
| Funding                  | 22  | Give the source of funding and the role of the funders for the present study and, if applicable, for the original study on which the present article is based                                                | Yes (21)                                                      |

\*Give information separately for cases and controls in case-control studies and, if applicable, for exposed and unexposed groups in cohort and cross-sectional studies.

1  
2  
3  
4  
5  
6  
7  
8  
9  
10  
11  
12  
13  
14  
15  
16  
17  
18  
19  
20  
21  
22  
23  
24  
25  
26  
27  
28  
29  
30  
31  
32  
33  
34  
35  
36  
37  
38  
39  
40  
41  
42  
43  
44  
45  
46  
47  
48  
49  
50  
51  
52  
53  
54  
55  
56  
57  
58  
59  
60

**Note:** An Explanation and Elaboration article discusses each checklist item and gives methodological background and published examples of transparent reporting. The STROBE checklist is best used in conjunction with this article (freely available on the Web sites of PLoS Medicine at <http://www.plosmedicine.org/>, Annals of Internal Medicine at <http://www.annals.org/>, and Epidemiology at <http://www.epidem.com/>). Information on the STROBE Initiative is available at [www.strobe-statement.org](http://www.strobe-statement.org).

For peer review only

# BMJ Open

## Demographic and clinical characteristics of hospitalised unintentional poisoning in Aboriginal and non-Aboriginal preschool children in New South Wales, Australia: a population data linkage study

|                                 |                                                                                                                                                                                                                                                                                                                                                                                                                                                                                                                                                                                                                          |
|---------------------------------|--------------------------------------------------------------------------------------------------------------------------------------------------------------------------------------------------------------------------------------------------------------------------------------------------------------------------------------------------------------------------------------------------------------------------------------------------------------------------------------------------------------------------------------------------------------------------------------------------------------------------|
| Journal:                        | <i>BMJ Open</i>                                                                                                                                                                                                                                                                                                                                                                                                                                                                                                                                                                                                          |
| Manuscript ID                   | bmjopen-2018-022633.R1                                                                                                                                                                                                                                                                                                                                                                                                                                                                                                                                                                                                   |
| Article Type:                   | Research                                                                                                                                                                                                                                                                                                                                                                                                                                                                                                                                                                                                                 |
| Date Submitted by the Author:   | 07-Jun-2018                                                                                                                                                                                                                                                                                                                                                                                                                                                                                                                                                                                                              |
| Complete List of Authors:       | Lee, Caroline; University of New South Wales - Randwick Campus, Hanly, Mark; University of New South Wales, Centre for Big Data Research in Health<br>Larter, Natasha; Sydney Children's Hospitals Network Randwick and Westmead, Community Child Health<br>Zwi, Karen; Sydney Children's Hospitals Network Randwick and Westmead, Community Child Health; University of New South Wales<br>Woolfenden, Susan ; Sydney Children's Hospitals Network Randwick and Westmead, Community Child Health; University of New South Wales,<br>Jorm, Louisa; University of New South Wales, Centre for Big Data Research in Health |
| <b>Primary Subject Heading</b>: | Paediatrics                                                                                                                                                                                                                                                                                                                                                                                                                                                                                                                                                                                                              |
| Secondary Subject Heading:      | Public health                                                                                                                                                                                                                                                                                                                                                                                                                                                                                                                                                                                                            |
| Keywords:                       | Child, preschool, Poisoning, Aboriginal, Data linkage, unintentional injury                                                                                                                                                                                                                                                                                                                                                                                                                                                                                                                                              |
|                                 |                                                                                                                                                                                                                                                                                                                                                                                                                                                                                                                                                                                                                          |

SCHOLARONE™  
Manuscripts

1  
2  
3 **Title:** Demographic and clinical characteristics of hospitalised unintentional poisoning in  
4 Aboriginal and non-Aboriginal preschool children in New South Wales, Australia: a population  
5 data linkage study  
6  
7

8  
9 **Corresponding author:** Caroline Lee, 6 Royal Poinciana Way Coffs Harbour,  
10 [caroline.lee@unsw.edu.au](mailto:caroline.lee@unsw.edu.au)  
11

12  
13 **Co-Authors:**

14  
15 Caroline Lee, University of New South Wales, Sydney, Australia  
16

17  
18 Mark Hanly, Centre for Big Data Research in Health, University of New South Wales, Sydney,  
19 Australia  
20

21  
22 Natasha Larter, Department of Community Child Health, Sydney Children's Hospital Network,  
23 Sydney, Australia  
24

25  
26 Karen Zwi, Department of Community Child Health, Sydney Children's Hospital Network,  
27 Sydney, Australia; University of New South Wales, Sydney, Australia  
28

29  
30 Susan Woolfenden, Department of Community Child Health, Sydney Children's Hospital  
31 Network, Sydney, Australia; University of New South Wales, Sydney, Australia  
32

33  
34 Louisa Jorm, Centre for Big Data Research in Health, University of New South Wales, Sydney,  
35 Australia  
36

37  
38 **Keywords [MeSH]:** poisoning; child, preschool; accidents; Oceanic Ancestry Group;  
39 hospitalization/statistics and numerical data  
40

41  
42 **Word count:** 2991  
43  
44  
45  
46  
47  
48  
49  
50  
51  
52  
53  
54  
55  
56  
57  
58  
59  
60

## Demographic and clinical characteristics of hospitalised unintentional poisoning in Aboriginal and non-Aboriginal preschool children in New South Wales, Australia: a population data linkage study

### Abstract

**Objectives:** To investigate differences in demographic and clinical characteristics of Aboriginal and non-Aboriginal children aged 0-4 years hospitalised for unintentional poisoning in New South Wales (NSW), Australia.

**Design and setting:** Retrospective whole-of-population cohort analysis of linked hospital and mortality data for 2000-2014

**Participants:** All children (Aboriginal and non-Aboriginal) under the age of five years who born in a hospital in NSW from 2000 to 2009

**Outcomes:** The primary outcome was hospitalisation for unintentional poisoning. Logistic regression was used to estimate odds of poisoning hospitalisation for Aboriginal and non-Aboriginal children. Poisoning agents and clinical outcomes were compared by Aboriginality.

**Results:** The cohort included 767,119 children, including 28,528 (3.7%) Aboriginal children. Aboriginal children had approximately three times higher rates of hospitalised poisoning (1.34%) compared to non-Aboriginal children (0.41%). Poisoning incidence peaked at 2-3 years of age. Male sex, socioeconomic disadvantage and geographic remoteness were associated with higher odds of poisoning hospitalisation for Aboriginal and non-Aboriginal children, but associations with disadvantage and remoteness were statistically significant only for non-Aboriginal children. Most (83%) poisonings were caused by pharmaceutical agents. Few Aboriginal and non-Aboriginal children had repeat admissions for poisoning; most had a length of stay of one day or less. Only 8% of poisoning admissions involved contact with a social worker.

**Conclusion:** Commonly used medications in the general population contribute to poisonings amongst both Aboriginal and non-Aboriginal preschool aged children. This study highlights a need to develop culturally safe poisoning prevention strategies and policies.

### Strengths and limitations of this study



- 1  
2  
3  
4  
5  
6  
7  
8  
9  
10  
11  
12  
13  
14  
15  
16  
17  
18  
19  
20  
21  
22  
23  
24  
25  
26  
27  
28  
29  
30  
31  
32  
33  
34  
35  
36  
37  
38  
39  
40  
41  
42  
43  
44  
45  
46  
47  
48  
49  
50  
51  
52  
53  
54  
55  
56  
57  
58  
59  
60
- This study's strengths include its focus on preschool-aged children, large sample size due whole-of-population design, and minimal recall bias due to the use of routinely collected administrative data.
  - However, the use of administrative data limited the available covariates, so risk factors such as parent demographics, supervision and storage practice, and clinical information such as symptoms and treatment details, could not be examined.
  - Children were identified as Aboriginal if they had been recorded at least once as Aboriginal ('ever-identified' algorithm), which enhances the proportion of Aboriginal children recorded using hospital data but may introduce bias in that sicker children with more frequent hospitalisations have more opportunities for identification.
  - Our analysis of poisoning agents was limited to the International Classification of Diseases 10<sup>th</sup> edition (ICD-10) taxonomy, and in some circumstances it was not possible to determine specific agents, for example, 'other' categories.

## Introduction

Poisoning is a leading cause of childhood injury worldwide.[1] Preschool children (0-4 years) have a higher risk of poisoning related hospital admissions [2-4] due to their developmental stage [5] and are a priority for prevention. Amongst preschool children, poisoning incidence peaks at two to three years of age,[3, 5-8] reflecting their increased mobility and exploratory skills.[5, 6, 9]

Pharmaceutical substances, such as over-the-counter and prescription medications, cause most unintentional poisonings in Australia.[4] Amongst preschool children in Australia, the most common causes of hospitalised pharmaceutical poisoning include analgesic, anti-epileptic, psychotropic, and other systemic and cardiovascular medications.[3, 4, 7, 10-12]

Various demographic and socioeconomic risk factors contribute to poisoning amongst preschool children. Factors relating to the child (male, higher birth order), parents (younger age, perinatal depression, alcohol misuse), unsafe storage and socioeconomic deprivation are associated with increased poisoning risk.[1-3, 7, 8, 13-16] In Australia, remote areas also have higher poisoning rates.[4, 16]

Poisoning represents one of the largest Indigenous child health inequalities in high-income countries, with rate ratios for hospitalisation and mortality ranging from 1.1 to 3.9 and 1.2 to 15.4 respectively.[17] A recent whole-of-population study in New South Wales, Australia reported that Aboriginal children had nearly three times higher risk of poisoning hospitalisation compared with non-Aboriginal children.[18] Existing studies about poisoning amongst Indigenous children in high-income countries have limitations, such as the lack of a non-Indigenous comparison group and wide age ranges up to 18 years old that do not differentiate younger children.[19, 20] Previous Australian studies of poisoning amongst preschool children in the general population have not focussed on Aboriginal children.[3, 5, 7, 21] The current literature about poisoning amongst Aboriginal children in Australia is limited in its examination of risk factors and clinical outcomes.[11, 12, 18, 22] Specific poisoning agents and clinical outcomes of poisoning for Aboriginal children have not been described.[2, 10, 16, 23]

This is the first study to examine the characteristics of unintentional poisoning amongst preschool-aged Aboriginal Australian children. The study aimed to answer questions that will inform prevention efforts for this at-risk group during a time of peak incidence:

- 1) Are the demographic risk factors for poisoning (sex, socioeconomic status and geographic remoteness) similar for both Aboriginal and non-Aboriginal children?
- 2) Which agents most frequently result in poisoning hospitalisation and are they different for Aboriginal and non-Aboriginal children?

1  
2  
3  
4  
5  
6  
7  
8  
9  
10  
11  
12  
13  
14  
15  
16  
17  
18  
19  
20  
21  
22  
23  
24  
25  
26  
27  
28  
29  
30  
31  
32  
33  
34  
35  
36  
37  
38  
39  
40  
41  
42  
43  
44  
45  
46  
47  
48  
49  
50  
51  
52  
53  
54  
55  
56  
57  
58  
59  
60

3) Are the clinical outcomes from hospitalised poisoning similar for Aboriginal and non-Aboriginal children?

For peer review only

## Methods

### Study design and setting

This was a retrospective, whole-of-population cohort study using linked hospital and mortality data for NSW, Australia for the period 2000 to 2014. In 2011, NSW had a population of 7,218,529 people, of whom an estimated 208,476 (2.9%) were Aboriginal or Torres Strait Islander.[24]

### Data Sources

This study was part of the Indigenous Health Outcomes Patient Evaluation (IHOPE) project which compares health outcomes for Aboriginal and non-Aboriginal people in NSW using linked hospital and mortality data (Figure 1). Hospital data were sourced from the Admitted Patient Data Collection (APDC) and mortality data from the NSW Register of Births, Deaths and Marriages (RBDM). Probabilistic data linkage was performed by the NSW Centre for Health Record Linkage (<http://www.cherel.org.au>). De-identified, linked datasets were supplied to the researchers.

The RBDM contains details for all deaths in NSW. The APDC contains records for all inpatient separations (discharges, transfers and deaths) for all public and private hospitals and day procedure centres in NSW. Each separation record contains information about patient demographics, diagnoses, and procedures. Diagnoses are coded according to the International Classification of Diseases and Related Problems Australian Modification, tenth revision (ICD-10-AM). Separations are hereafter referred to as hospital admissions.

### Participants

Children born in a NSW hospital between June 1, 2000 and March 31, 2009 were followed from birth until their fifth birthday. Birth records were identified from the APDC dataset using the criteria of 'live born infant' (ICD-10-AM code Z38) in any diagnosis field. This birth cohort has been previously described.[18]

### Aboriginal status

Aboriginal status is routinely recorded in the APDC. The main analyses used an 'ever identified' algorithm that coded children as Aboriginal if they were ever identified as Aboriginal, yielding higher proportions of Aboriginal children compared to the most recent record or birth record (Supplement 1).[25] To test the sensitivity of this identification method, all analyses were repeated using Aboriginality defined solely on the child's birth record.

### Study variables

1  
2  
3 The main outcome was hospitalisation for unintentional poisoning, defined as an acute accidental  
4 exposure to, or overdose of, a toxic substance, whether accessed by a child or incorrectly administered by  
5 another person (wrong dosage, agent or frequency). The study focussed on ingested poisoning agents  
6 likely to require similar prevention approaches, including pharmaceutical (over-the-counter and  
7 prescription) and non-pharmaceutical agents, and excluding environmental exposures (Supplement 2).  
8 Poisoning cases were identified by a primary diagnosis of injury with an ICD-10-AM code T36-65,  
9 excluding toxic effect of metals (T56), carbon monoxide and other gases (T58-59) and noxious  
10 substances, venoms and food substances (T61-64).  
11  
12  
13  
14  
15

16 A poisoning admission was defined from the start date of an episode of care, to the date of separation or  
17 death. Multiple hospital admissions within a short time could be due to follow-up visits, transfer between  
18 hospitals, or change in care type within a hospital, related to the same poisoning event. Records falling  
19 within 75 days after the initial poisoning admission were excluded, based on the published ‘clear zone’  
20 for poisoning.[26]  
21  
22  
23  
24

25 Available demographic variables included child’s age, sex and area-level variables for socioeconomic  
26 disadvantage (Australian Bureau of Statistics Socioeconomic Indices for Areas (SEIFA) Index of Relative  
27 Socioeconomic Advantage and Disadvantage (IRSAD) [27]) and remoteness (Accessibility/Remoteness  
28 Index of Australia (ARIA) [28]) based on the child’s statistical local area of residence at birth. Due to  
29 small numbers in some categories, IRSAD was divided into tertiles, and ARIA into four categories  
30 ‘Major Cities’, ‘Inner Regional’, ‘Outer Regional’ and ‘Remote/Very Remote’ as used previously.[18]  
31 The age of first poisoning hospitalisation was analysed by single year intervals for Aboriginal and non-  
32 Aboriginal children.  
33  
34  
35  
36  
37

38 Poisoning agents were included if they were recorded in any diagnosis field (up to 50 fields). Clinical  
39 outcomes (repeat admissions, length of stay (LOS), procedures) were analysed for all poisoning  
40 admissions. LOS included the total number of hospital days related to the initial admission, and any  
41 subsequent admissions within 75 days. Procedures were classified at the ‘block’ level according to the  
42 Australian Classification for Health Interventions (ACHI), 8<sup>th</sup> edition.[29]  
43  
44  
45  
46

### 47 **Statistical analysis**

48

49 Differences in poisoning incidence were compared by demographic characteristics using chi squared  
50 tests, stratified by Aboriginality (RQ1). The crude and adjusted odds of poisoning hospitalisation  
51 associated with demographic characteristics were estimated using logistic regression (RQ1). Separate  
52 models were built for Aboriginal and non-Aboriginal children. Fully adjusted models included the  
53 variables sex, socioeconomic disadvantage and remoteness.  
54  
55  
56  
57  
58  
59  
60

1  
2  
3 Amongst children with a poisoning hospitalisation, incidence was examined by year of age (RQ1). The  
4 groups of poisoning agents and the ten most common individual agents were examined across all  
5 poisoning admissions (RQ2). Differences in poisoning agents (both groups and individual agents) by  
6 Aboriginality were tested using chi squared tests (RQ2). The number and types of procedures and LOS  
7 were examined for all poisoning admissions, and compared by Aboriginality, with descriptive statistics  
8 and chi squared tests (RQ3). Data was prepared with SAS Version 9.4 (SAS Institute) and analysed in  
9 Stata Version 14 (StataCorp).  
10  
11  
12  
13

### 14 15 **Ethics Approval**

16  
17 Ethics approval was granted by the New South Wales Population & Health Services Research Committee  
18 (2009/04/141) and the Aboriginal Health and Medical Research Council Committee (684/09).  
19  
20

### 21 **Patient and public involvement**

22  
23 Patients were not directly involved in the development of the research question, outcome measures or  
24 study design. All patient data was de-identified prior to analysis. Results were presented at a public  
25 Aboriginal community health forum in La Perouse, Sydney, Australia, attended by health providers and  
26 community members. Results were also presented at an international injury prevention conference  
27 attended by policymakers and researchers, and to the Board of Kidsafe Australia. A patient information  
28 poster will be developed and presented to Kidsafe Board.  
29  
30  
31  
32  
33  
34  
35  
36  
37  
38  
39  
40  
41  
42  
43  
44  
45  
46  
47  
48  
49  
50  
51  
52  
53  
54  
55  
56  
57  
58  
59  
60

## Results

### Study Population

The cohort included 767,119 children born in NSW between July 1, 2000 and March 31, 2009, of whom 28,528 (3.7%) were Aboriginal (Figure 1). From 2000-2014, there were 3,757 hospital admissions with a primary diagnosis of poisoning. Of these, 321 fell within the 75-day clear zone and were not analysed as new admissions. This left 3,436 poisoning admissions for 3,385 individual children, including 382 (11%) Aboriginal children. Aboriginal children were significantly overrepresented amongst children who had been poisoned ( $\chi^2=543.6$ ,  $p<0.001$ ).

### Demographic Characteristics

Poisoning admission by demographics characteristics for all children in the cohort are shown in Table 1. More Aboriginal than non-Aboriginal children lived in the most disadvantaged areas and in Remote or Very Remote areas. The proportion of children hospitalised for poisoning was higher for boys compared to girls, and increased with increasing socioeconomic disadvantage and increasing remoteness for both Aboriginal and non-Aboriginal children.

Crude and adjusted odds for poisoning hospitalisation for Aboriginal and non-Aboriginal children are shown in Figure 2. Male sex was significantly associated with increased risk of poisoning for both Aboriginal (adjusted odds ratio [aOR] 1.27, 95% CI 1.03-1.56) and non-Aboriginal children (aOR 1.17, 95% CI 1.09-1.26). For non-Aboriginal children, poisoning risk increased with increasing socioeconomic disadvantage and increasing geographic remoteness. For Aboriginal children, increasing socioeconomic disadvantage was also associated with higher poisoning risk, although confidence intervals were wider. However, geographic remoteness was not significantly associated with an increasing poisoning risk.

**Table 1: Poisoning hospitalisations by demographic characteristics, Aboriginal and non-Aboriginal children, New South Wales, 2000-2014**

|                         | Aboriginal children |                    |      | Non-Aboriginal children |                    |        | All children   |                    |        |
|-------------------------|---------------------|--------------------|------|-------------------------|--------------------|--------|----------------|--------------------|--------|
|                         | N (column %)        | N poisoned (row %) | p    | N (column %)            | N poisoned (row %) | p      | N (column %)   | N poisoned (row %) | p      |
| Total (row %)           | 28,528 (100)        | 382 (1.34)         |      | 738,591 (100)           | 3,003 (0.41)       |        | 767,119 (100)  | 3,385 (0.44)       |        |
| Sex                     |                     |                    | 0.03 |                         |                    | <0.001 |                |                    | <0.001 |
| Female                  | 13,472 (47.2)       | 159 (1.18)         |      | 358,899 (48.6)          | 1,342 (0.37)       |        | 372,371 (48.5) | 1,501 (0.40)       |        |
| Male                    | 15,056 (52.8)       | 223 (1.48)         |      | 379,692 (51.4)          | 1,661 (0.44)       |        | 394,748 (51.5) | 1,884 (0.48)       |        |
| Area-level disadvantage |                     |                    | 0.05 |                         |                    | <0.001 |                |                    | <0.001 |
| 1 - Least Disadvantaged | 2,113 (7.4)         | 16 (0.76)          |      | 246,117 (33.3)          | 685 (0.28)         |        | 248,230 (32.4) | 701 (0.28)         |        |
| 2                       | 7,558 (26.5)        | 107 (1.42)         |      | 250,639 (33.9)          | 1,003 (0.40)       |        | 258,197 (33.7) | 1,110 (0.43)       |        |
| 3 - Most disadvantaged  | 18,857 (66.1)       | 259 (1.37)         |      | 241,835 (32.7)          | 1,315 (0.54)       |        | 260,692 (34.0) | 1,574 (0.60)       |        |
| Remoteness              |                     |                    | 0.11 |                         |                    | <0.001 |                |                    | <0.001 |
| Major city              | 9,056 (31.7)        | 105 (1.16)         |      | 492,228 (66.6)          | 1,659 (0.34)       |        | 501,284 (65.3) | 1,764 (0.35)       |        |
| Inner regional          | 10,058 (35.3)       | 132 (1.31)         |      | 182,366 (24.7)          | 880 (0.48)         |        | 192,424 (25.1) | 1,012 (0.53)       |        |
| Outer regional          | 6,852 (24.0)        | 110 (1.61)         |      | 58,709 (7.9)            | 419 (0.71)         |        | 65,561 (8.5)   | 529 (0.81)         |        |
| Remote/Very Remote      | 2,562 (9.0)         | 35 (1.37)          |      | 5,288 (0.7)             | 45 (0.85)          |        | 7,850 (1.0)    | 80 (1.02)          |        |

P-values are from chi-squared tests, testing the null hypothesis that poisoning admissions are distributed equally across the levels of each covariate.



Incidence by one-year age intervals was similar amongst Aboriginal and non-Aboriginal children (Table 2). Poisoning admissions increased from one year, were most frequent between two to three years, and were least frequent at under one year and over four years of age.

**Table 2: Age at poisoning admission, Aboriginal and non-Aboriginal children, New South Wales, 2000-2014**

| <b>Age (years)</b> | <b>Aboriginal children<br/><i>N</i> (column %)</b> | <b>Non-Aboriginal children<br/><i>N</i> (column %)</b> |
|--------------------|----------------------------------------------------|--------------------------------------------------------|
| <1                 | 21 (6)                                             | 220 (7)                                                |
| 1-2                | 96 (25)                                            | 952 (32)                                               |
| 2-3                | 152 (40)                                           | 1211 (40)                                              |
| 3-4                | 73 (19)                                            | 446 (15)                                               |
| 4-5                | 40 (10)                                            | 174 (6)                                                |
| Total              | 382                                                | 3,003                                                  |

### Poisoning agents

Pharmaceutical agents caused most poisonings for both Aboriginal (83%) and non-Aboriginal (81%) children (Table 3).

The most frequent groups of poisoning agents were similar for both Aboriginal and non-Aboriginal children: nonopioid analgesic, antipyretic and antirheumatics (including paracetamol and ibuprofen); antiepileptic, sedative-hypnotic and antiparkinsonism medications; psychotropics; and cardiovascular medications (Table 3). Aboriginal children had a higher proportion of poisoning admissions from cardiovascular medications than non-Aboriginal children (14% and 11%,  $p=0.032$ ), whilst non-Aboriginal children had a higher proportion from nonopioid analgesic, antipyretic and antirheumatics (15% and 8%,  $p<0.001$ ) and autonomic nervous system medications (8% and 5%,  $p=0.048$ ).

The two most frequent individual poisoning agents were benzodiazepines (11%) and 4-aminophenol derivatives (paracetamol) (11%) (Table 3). Together with other antihypertensives not elsewhere classified, they accounted for one in three poisoning admissions. Benzodiazepines and other antihypertensives not elsewhere classified were the two most common individual agents for Aboriginal children and caused a higher proportion of admissions for Aboriginal than non-Aboriginal children (benzodiazepines: 14% and 10%,  $p=0.025$ ; other antihypertensives not elsewhere classified: 10% and 6%,  $p=0.002$ ).

**Table 3: Poisoning agents by class and ten most frequent individual agents, for Aboriginal and Non-Aboriginal children, New South Wales, 2000-2014**

| ICD-10 Diagnosis Code                                                             | Total<br>N (%)  | Aboriginal<br>N (%) | Non-Aboriginal<br>N (%) | p            |
|-----------------------------------------------------------------------------------|-----------------|---------------------|-------------------------|--------------|
| T36-65: All poisoning admissions                                                  | 3,436 (100)     | 391 (11)            | 3,045 (89)              |              |
| T36-50: Pharmaceutical <sup>a</sup>                                               | 2,859 (83)      | 318 (81)            | 2,541 (83)              | 0.291        |
| T51-65: Non-pharmaceutical <sup>a</sup>                                           | 588 (17)        | 76 (19)             | 512 (17)                | 0.195        |
| <b>Pharmaceutical Agents</b>                                                      |                 |                     |                         |              |
| T36-37: Antibiotics, anti-infectives, anti-parasitics <sup>b</sup>                | 47 (1)          | 7 (2)               | 40 (1)                  | 0.445        |
| T38: Hormones and synthetic substitutes                                           | 141 (4)         | 22 (6)              | 119 (4)                 | 0.107        |
| <b>T38.3: Insulin and oral hypoglycemic drugs</b>                                 | <b>96 (3)</b>   | <b>17 (4)</b>       | <b>79 (3)</b>           | <b>0.048</b> |
| T39: Nonopioid analgesics, antipyretics and antirheumatics                        | 493 (14)        | 31 (8)              | 462 (15)                | <0.001       |
| <b>T39.1: 4-aminophenol derivatives</b>                                           | <b>374 (11)</b> | <b>24 (6)</b>       | <b>350 (11)</b>         | <b>0.001</b> |
| T40 Narcotics and hallucinogens                                                   | 178 (5)         | 25 (6)              | 153 (5)                 | 0.25         |
| T41: Poisoning by anaesthetics and therapeutic gases                              | 14 (0)          | 0 (0)               | 14 (0)                  | 0.179        |
| T42: Antiepileptic, sedative-hypnotic and antiparkinsonism                        | 492 (14)        | 66 (17)             | 426 (14)                | 0.125        |
| <b>T42.4: Benzodiazepines</b>                                                     | <b>370 (11)</b> | <b>55 (14)</b>      | <b>315 (10)</b>         | <b>0.025</b> |
| T43: Psychotropic drugs, not elsewhere classified                                 | 394 (11)        | 55 (14)             | 339 (11)                | 0.087        |
| <b>T43.2: Other and unspecified antidepressants</b>                               | <b>149 (4)</b>  | <b>15 (4)</b>       | <b>134 (4)</b>          | <b>0.606</b> |
| T44: Autonomic nervous system drugs                                               | 251 (7)         | 19 (5)              | 232 (8)                 | 0.048        |
| <b>T44.3: Other parasympatholytics and spasmolytics, not elsewhere classified</b> | <b>93 (3)</b>   | <b>7 (2)</b>        | <b>86 (3)</b>           | <b>0.236</b> |
| <b>T44.7: Beta adrenoreceptor antagonists, not elsewhere classified</b>           | <b>105 (3)</b>  | <b>7 (2)</b>        | <b>98 (3)</b>           | <b>0.122</b> |
| T45: Systemic and haematological agents                                           | 286 (8)         | 23 (6)              | 263 (9)                 | 0.063        |
| <b>T45.0: Antiallergic and antiemetic drugs</b>                                   | <b>150 (4)</b>  | <b>14 (4)</b>       | <b>136 (4)</b>          | <b>0.42</b>  |
| <b>T45.4: Iron and its compounds</b>                                              | <b>83 (2)</b>   | <sup>c</sup>        | <sup>c</sup>            |              |
| T46: Cardiovascular system drugs                                                  | 382 (11)        | 56 (14)             | 326 (11)                | 0.032        |
| <b>T46.5: Other antihypertensives, not elsewhere classified</b>                   | <b>211 (6)</b>  | <b>38 (10)</b>      | <b>173 (6)</b>          | <b>0.002</b> |
| T47: Gastrointestinal system drugs                                                | 80 (2)          | 8 (2)               | 72 (2)                  | 0.694        |
| T48: Smooth and skeletal muscle and respiratory system agents                     | 98 (3)          | 6 (2)               | 92 (3)                  | 0.096        |
| T49: Topical agents and ophthalmological, otorhinolaryngological and dental drugs | 143 (4)         | 12 (3)              | 131 (4)                 | 0.25         |

|                                                                                       |               |               |               |              |
|---------------------------------------------------------------------------------------|---------------|---------------|---------------|--------------|
| T50: Diuretics and other and unspecified drugs, medicaments and biological substances | 207 (6)       | 22 (6)        | 185 (6)       | 0.725        |
| <b>T50.9: Other and unspecified drugs, medicaments and biologicals</b>                | <b>94 (3)</b> | <b>10 (3)</b> | <b>84 (3)</b> | <b>0.819</b> |
| <b>Non-pharmaceutical agents</b>                                                      |               |               |               |              |
| T51: Toxic effect of alcohol                                                          | 35 (1)        | 5 (1)         | 30 (1)        | 0.586        |
| T52: Toxic effect of organic solvents                                                 | 185 (5)       | 22 (6)        | 163 (5)       | 0.822        |
| T53: Toxic effect of halogen derivatives of aliphatic and aromatic hydrocarbons       | 10 (0)        | 0 (0)         | 10 (0)        | 0.256        |
| T54-55: Toxic effect of corrosive substances, soaps and detergents <sup>b</sup>       | 132 (4)       | 17 (4)        | 115 (4)       | 0.58         |
| T57: Toxic effect of other inorganic substances                                       | 0 (0)         | 0 (0)         | 0 (0)         |              |
| T60: Toxic effect of pesticides                                                       | 106 (3)       | 12 (3)        | 94 (3)        | 0.985        |
| T65: Toxic effect of other and unspecified substances                                 | 124 (4)       | 21 (5)        | 103 (3)       | 0.047        |

<sup>a</sup> May exceed total number of poisoning admissions due to multiple agents per admission

<sup>b</sup> Categories combined due to small cell numbers

<sup>c</sup> Suppressed due to small cell numbers

## Clinical outcomes

Aboriginal and non-Aboriginal children had similar clinical outcomes in terms of repeat admissions, LOS and procedures (Table 4). There was one death from poisoning during the study period.

### *Repeat admissions*

There were 51 repeat admissions (1% of poisoning admissions). Of these, 42 were non-Aboriginal and 9 were Aboriginal. Due to small numbers, no further analysis of this group was undertaken.

### *Length of stay*

Most children (91%) hospitalised for poisoning had a short LOS of  $\leq 1$  day. Excluding one outlier, LOS ranged from  $<1$  to 18 days. The distribution of LOS was similar for Aboriginal and non-Aboriginal children (Table 3,  $\chi^2=3.4147$ ,  $p=0.332$ ).

**Table 4: Clinical outcomes of Aboriginal and non-Aboriginal children with a poisoning hospitalisation, New South Wales, 2000-2014**

|                                                                | Aboriginal N (%) | Non-Aboriginal N (%) | Total N (%) |
|----------------------------------------------------------------|------------------|----------------------|-------------|
| Total number of poisoning admissions                           | 391 (100)        | 3,045 (100)          | 3,436 (100) |
| Repeat admissions                                              | 9 (2)            | 42 (1)               | 51 (1)      |
| Length of stay (days)                                          |                  |                      |             |
| <1                                                             | 125 (32)         | 1,085 (36)           | 1,210 (35)  |
| 1                                                              | 225 (58)         | 1,707 (56)           | 1,932 (56)  |
| 2                                                              | 25 (6)           | 158 (5)              | 183 (5)     |
| 3+                                                             | 16 (4)           | 95 (3)               | 111 (3)     |
| Total number of procedures                                     | 39 (10)          | 335 (11)             | 374 (11)    |
| Allied health interventions                                    | 27 (7)           | 233 (8)              | 260 (8)     |
| Airway and ventilation                                         | 5 (1)            | 32 (1)               | 37 (1)      |
| Other (including diagnostics and pharmacotherapy) <sup>a</sup> | 7 (2)            | 70 (2)               | 77 (2)      |

<sup>a</sup>Combined due to small cell numbers

### *Procedures*

Most children hospitalised for poisoning had no recorded procedures (89%, 3,062/3,436) and this proportion was similar for Aboriginal and non-Aboriginal children. Of the 374 hospital admissions with a recorded procedure, the majority were allied health interventions, mostly a social worker consultation (8% of poisoning admissions).

## Sensitivity Analyses

1  
2  
3 Compared with the ever-identified method, defining Aboriginal status by most recent record and birth  
4 record reduced the numbers of children in the cohort to 25,891 and 21,576 respectively, and the number  
5 of children poisoned to 319 and 246 respectively (Supplement 1). Other findings remained similar.  
6  
7  
8  
9  
10  
11  
12  
13  
14  
15  
16  
17  
18  
19  
20  
21  
22  
23  
24  
25  
26  
27  
28  
29  
30  
31  
32  
33  
34  
35  
36  
37  
38  
39  
40  
41  
42  
43  
44  
45  
46  
47  
48  
49  
50  
51  
52  
53  
54  
55  
56  
57  
58  
59  
60

For peer review only

## Discussion

Compared with non-Aboriginal children, preschool Aboriginal children in NSW have almost three times the rate of hospitalised poisoning, but similar patterns of poisoning risk across available demographic factors, poisoning agents and clinical outcomes.

Amongst both Aboriginal and non-Aboriginal children, the incidence of hospitalised poisoning increased from age one, peaked at two to three years, and declined by four years, consistent with previous studies.[3, 5-8, 11] Male sex was a significant risk factor for both Aboriginal and non-Aboriginal children, consistent with findings from the general population [2, 3, 7, 16] and amongst Aboriginal children in NSW.[11, 21] Higher poisoning rates amongst boys may be due to earlier development of motor skills than risk perception.[5]

Poisoning risk increased with socioeconomic disadvantage amongst Aboriginal and non-Aboriginal children, and increased with geographic remoteness amongst non-Aboriginal children. Socioeconomic disadvantage is a well-established risk factor for unintentional injury [14, 30] and children from low-income backgrounds have a higher poisoning risk [13, 14, 31] due to more co-morbidities and medication usage, less access to childcare and storage equipment, and overcrowding.[31]

Geographic remoteness was associated with significantly increased poisoning risk amongst non-Aboriginal children. In contrast, no significant trend between poisoning and geographic remoteness was evident amongst Aboriginal children, possibly reflecting small subgroup sizes and wider confidence intervals. This may also reflect additional barriers in access to health services, or differences in housing, medication availability, or other social factors experienced by Aboriginal people in remote areas.

Broadly, higher poisoning hospitalisations in remote areas may suggest more children are being poisoned, but also that children presenting to rural hospitals are more likely to be admitted [4, 16] for reasons including distance from facilities, limited specialist services and delayed diagnostic tests.[23, 32] Differences in poisoning agents by geographic region may also contribute. Some have suggested children in rural areas are more likely to be poisoned by chemical such as pesticides. However, evidence is conflicting, with this hypothesis supported by a Queensland study [2] but not a subsequent NSW study which did not find higher rates of chemical poisoning in rural areas.[10]

Several reasons may contribute to the disparity in hospitalised poisoning between Aboriginal and non-Aboriginal children. Aboriginal people experience a higher burden of socioeconomic disadvantage and chronic disease, potentially exposing children to more medications. Overcrowding and poor housing disproportionately affects Aboriginal people and contributes to stress, poor supervision and health

1  
2  
3 problems.[33] Higher levels of mobility amongst Aboriginal people [33] may expose children to  
4 medications belonging to different people in their own or other people's homes.

6  
7 Pharmaceuticals, including adult and paediatric over-the-counter and prescription medications, are the  
8 leading causes of hospitalised unintentional poisonings amongst both Aboriginal and non-Aboriginal  
9 children. The most frequent groups of poisoning agents identified in this study—analgesic; psychotropic,  
10 antiepileptic, and sedative; and cardiovascular agents—are commonly prescribed medications in  
11 Australia. Of these, the most frequent individual agents benzodiazepines, 4-aminophenol derivatives  
12 (paracetamol) and other antihypertensives not elsewhere classified (for example clonidine) accounted for  
13 almost one-third of all poisoning admissions.

15  
16  
17  
18  
19 Chronic diseases are highly prevalent, affecting 11 million Australians. In 2014-15, 117 million  
20 medications were prescribed by a GP, a 17% increase since 2010-11.[34] This rising medication use in  
21 Australia could be contributing towards unintentional childhood poisonings, as has been demonstrated in  
22 the United States, where pharmaceutical poisonings in children have been associated with trends in adult  
23 medication prescriptions.[35]

25  
26  
27 Benzodiazepines were the most common poisoning agent for Aboriginal children, similar to a previous  
28 report amongst Aboriginal and non-Aboriginal people in NSW.[22] Benzodiazepines are widely  
29 prescribed in Australia, often for anxiety and insomnia. Aboriginal people experience a higher burden of  
30 mental health issues [36] and higher rates of benzodiazepine poisoning amongst Aboriginal children may  
31 reflect higher adult usage, although we cannot confirm this using the available data.

33  
34  
35  
36 Antihypertensives not elsewhere classified were the second most frequent poisoning agent for Aboriginal  
37 children in our study. In Australia, this largely includes clonidine, which is used for child behavioural  
38 disorders.[37] Aboriginal children, particularly those from disadvantaged backgrounds, have a higher risk  
39 of emotional or behavioural difficulties.[38, 39] Childhood clonidine poisoning has been found in other  
40 research to be often caused by a child accidentally ingesting clonidine belonging to another child such as  
41 an older sibling.[40]

43  
44  
45  
46 Most children hospitalised for poisoning had a short LOS of  $\leq 1$  day and few required procedures,  
47 consistent with previous reports.[3, 23, 32] Allied health interventions were the most common procedure,  
48 yet fewer than one in ten poisoning hospitalisations had a recorded social worker consultation. Social  
49 workers can support parents during a stressful hospitalisation, and provide injury prevention education  
50 when they are more likely to be receptive.[41] Low utilisation of this resource presents a lost opportunity  
51 for safety promotion. However, cultural sensitivity is required to promote safety and not instigate blame  
52 or fear, given the intergenerational trauma around child removal for Aboriginal families.[42]



### Strengths and Limitations

This study's strengths include its focus on preschool-aged children, whole-of-population design and minimal recall bias using routinely collected administrative data. However, covariates were limited, and risk factors previously demonstrated to affect poisoning risk were unavailable, such as perinatal depression [13, 14], younger maternal age [8], parental alcohol misuse [8, 13], poor storage and supervision [21], household dwelling and socioeconomic deprivation [13, 14]. Clinical information (such as time to presentation, symptoms, laboratory results, treatment, complications [7]) were also unavailable. The use of an area-level index for socioeconomic status may introduce ecological bias.

The under-identification of Aboriginal children in Australian public hospital data can affect estimates of health outcomes.[25] This study used an 'ever-identified' algorithm for children recorded at least once as Aboriginal in order to maximise the number of poisoning events in Aboriginal children for analysis. Although this method may introduce bias in comparison of event rates between Aboriginal and non-Aboriginal people due to differential increase in identification among sicker individuals with more hospital records, such comparisons were not the main purpose of our study. Also, results of the sensitivity analysis indicated that the methods of identification did not alter the main conclusions (Supplement 1).

Hospital admissions represent only a fraction of poisonings. Our study does not reflect the complete spectrum of early childhood poisoning incidents, but captures the most severe hospitalised cases with the largest impact on children and health services.

Finally, our analysis of poisoning agents was limited to the ICD-10 taxonomy. In some circumstances it was not possible to determine specific agents, for example, 'other' categories.

### Implications for practice and prevention

Safe packaging and storage are key to childhood poisoning prevention. Child resistant packaging for medications was introduced in Australia under the *Therapeutic Goods Act 1989*. [43] However, child resistant closures for medications are not always consistently used [32] and many adult medications are kept in non-reclosable packaging that children can access. Limitations in packaging design should be improved for adult medications as well as child medications.

Unsafe storage also increases poisoning risk.[15] Aboriginal families and low-income families may face barriers in promoting safe storage due to costs of safety equipment and prohibitions on home installations in public housing or rental properties.[44, 45] Providing low cost or free equipment can improve household storage practices, particularly with education and fitting assistance.[46] Reducing poisoning

1  
2  
3 rates requires combined strategies of household storage interventions, accessible poisons information  
4 centres, and enforcement of packaging legislation.[47]  
5  
6

7 No known injury prevention programs have specifically addressed unintentional poisoning in Aboriginal  
8 communities.[48] The ‘Safe Homes Safe Kids’ program provided home safety education and devices to  
9 Aboriginal families in the Illawarra region of NSW.[47] Future research involving community  
10 consultation is needed to address poisoning prevention in Aboriginal communities, considering factors  
11 such as poverty, trauma, housing, and family separation.[49]  
12  
13  
14  
15  
16  
17  
18  
19  
20  
21  
22  
23  
24  
25  
26  
27  
28  
29  
30  
31  
32  
33  
34  
35  
36  
37  
38  
39  
40  
41  
42  
43  
44  
45  
46  
47  
48  
49  
50  
51  
52  
53  
54  
55  
56  
57  
58  
59  
60

## Conclusion

Unintentional poisoning is most prevalent amongst preschool-aged children, and disproportionately affects Aboriginal children. This study confirmed the inequity in hospitalised poisonings between Aboriginal and non-Aboriginal children, and demonstrated that adult and child medications commonly used in the general population contribute to poisonings amongst both groups. With a rising prevalence of chronic disease and increases in prescription medication use amongst both Aboriginal people and the wider community, keeping children safe from unintentional poisoning should be a priority. Further research and policy development is needed to investigate culturally safe prevention strategies that include improved packaging, safe storage and education.

## Funding

This work was supported by the Australian National Health and Medical Research Council (573113).

## Contributions

CL, SW, LJ, and MH contributed to the conception and design of the study, including the research questions and the analysis. CL wrote each drafts, and together with MH, produced the tables and figures. LJ, SW and MH provided technical and moral support throughout the study. All authors contributed to the drafting of the work, approval of the final manuscript, and critical interpretation of its findings, with particular contributions from KZ, SW and NL regarding the translation of findings with other stakeholders for prevention.

## Acknowledgements

The authors wish to thank Dr Holger Moller who prepared the dataset prior to the study period; this study builds upon knowledge generated by his previous research. The authors also wish to thank Professor Nicholas Buckley, Dr Jane Bell, Dr Ruth Barker and Professor Sallie Pearson for their assistance in the interpretation of poisoning agents; and Professor Rebecca Ivers, Professor Kathleen Clapham, and Dr Kathleen Falster for consultation about translating the research findings for policy and practice.

## Competing Interests

None declared

## Funding

Australian National Health and Medical Research Council (573113)

**Data sharing statement:** no additional data are available.

1  
2  
3 **Figure 1:** Indigenous Health Outcomes Patient Evaluation (IHOPE) data sources and study cohort  
4 selection  
5

6  
7 **Figure 2:** Crude and adjusted odds ratios with 95% confidence intervals for poisoning hospitalisation, by  
8 demographic factors, Aboriginal and non-Aboriginal children, New South Wales, 2000-2014. Legend:  
9 OR: odds ratio, aOR: adjusted odds ratio, CI: confidence interval. Fully adjusted models included  
10 variables sex, area-level disadvantage, and geographic remoteness  
11  
12  
13  
14  
15  
16  
17  
18  
19  
20  
21  
22  
23  
24  
25  
26  
27  
28  
29  
30  
31  
32  
33  
34  
35  
36  
37  
38  
39  
40  
41  
42  
43  
44  
45  
46  
47  
48  
49  
50  
51  
52  
53  
54  
55  
56  
57  
58  
59  
60

## References

1. World Health Organization. World report on child injury prevention. Switzerland: World Health Organization; 2008. Report No.: 9241563575.
2. Reith D, Pitt W, Hockey R. Childhood poisoning in Queensland: an analysis of presentation and admission rates. *Journal of paediatrics and child health*. 2001;37(5):446-50.
3. Cripps R, Steel D. Childhood poisoning in Australia. South Australia: AIHW National Injury Surveillance Unit, Flinders University; 2006.
4. Tovell A, McKenna K, Bradley C, Pointer S. Hospital separations due to injury and poisoning, Australia 2009-10. Canberra: Australian Institute of Health and Welfare; 2012. Report No.: Cat. no. INJCAT 145.
5. Schmertmann M, Williamson A, Black D. Stable age pattern supports role of development in unintentional childhood poisoning. *Injury Prevention*. 2008;14(1):30-3.
6. Agran PF, Anderson C, Winn D, Trent R, Walton-Haynes L, Thayer S. Rates of pediatric injuries by 3-month intervals for children 0 to 3 years of age. *Pediatrics*. 2003;111(6 Pt 1):e683-92.
7. Hoy J, Day L, Tibballs J, Ozanne-Smith J. Unintentional poisoning hospitalisations among young children in Victoria. *Injury Prevention*. 1999;5(1):31-5.
8. Tyrrell EG, Orton E, Tata LJ, Kendrick D. Children at risk of medicinal and non-medicinal poisoning: a population-based case-control study in general practice. *British Journal of General Practice*. 2012;62(605):e827-33.
9. Rodgers GB, Franklin RL, Midgett JD. Unintentional paediatric ingestion poisonings and the role of imitative behaviour. *Injury Prevention*. 2012;18(2):103.
10. Lam LT. Childhood and adolescence poisoning in NSW, Australia: an analysis of age, sex, geographic, and poison types. *Injury Prevention*. 2003;9(4):338-42.
11. Moller H, Falster K, Ivers R, Falster MO, Clapham K, Jorm L. Closing the Aboriginal child injury gap: targets for injury prevention. *Australian and New Zealand Journal of Public Health*. 2017;41(1):8-14.
12. Australian Institute of Health and Welfare (AIHW): Pointer S. Hospitalised injuries in Aboriginal and Torres Strait Islander children and young people 2011-13. Canberra: AIHW; 2016. Report No.: Cat no. INJCAT 172.
13. Orton E, Kendrick D, West J, Tata LJ. Independent risk factors for injury in pre-school children: three population-based nested case-control studies using routine primary care data. *PloS one*. 2012;7(4):e35193.
14. Laursen B, Nielsen JW. Influence of sociodemographic factors on the risk of unintentional childhood home injuries. *European journal of public health*. 2008;18(4):366-70.

15. Kendrick D, Majsak-Newman G, Benford P, Coupland C, Timblin C, Hayes M, et al. Poison prevention practices and medically attended poisoning in young children: multicentre case-control study. *Injury Prevention*. 2017;23(2):93.
16. O'Connor P. Differentials in poisoning rates of young Australian children according to residential location and geographical remoteness. *Injury Prevention*. 2005;11(4):204-6.
17. Moller H, Falster K, Ivers R, Jorm L. Inequalities in unintentional injuries between indigenous and non-indigenous children: a systematic review. *Injury Prevention*. 2015;21(e1):e144-52.
18. Moller H, Falster K, Ivers R, Falster M, Randall D, Clapham K, et al. Inequalities in Hospitalized Unintentional Injury Between Aboriginal and Non-Aboriginal Children in New South Wales, Australia. *American Journal of Public Health*. 2016;106(5):899-905.
19. Alaghebandan R, Sikdar KC, MacDonald D, Collins KD, Rossignol AM. Unintentional injuries among children and adolescents in Aboriginal and non-Aboriginal communities, Newfoundland and Labrador, Canada. *International Journal of Circumpolar Health*. 2010;69(1):61-71.
20. Johnson SI, Sullivan M, Grossman DC. Hospitalizations for injury among American Indian youth in Washington. *Western Journal of Medicine*. 1999;171(1):10-4.
21. Schmetzmann M, Williamson A, Black D, Wilson L. Risk factors for unintentional poisoning in children aged 1-3 years in NSW Australia: a case-control study. *BMC pediatrics*. 2013;13:88.
22. Walter S. Mortality and hospitalisation due to injury in the Aboriginal population of New South Wales. North Sydney, Australia: New South Wales Department of Health. 2010.
23. Cheng DR, Ip CCK. Unintentional paediatric poisoning in rural Victoria: Incidence and admission rates. *Australian journal of rural health*. 2012;20(6):339-43.
24. Australian Bureau of Statistics. Estimates of Aboriginal and Torres Strait Islander Australians, June 2011. [updated 27 January 2016. Available from: <http://www.abs.gov.au/ausstats/abs@.nsf/mf/3238.0.55.001>.
25. Gialamas A, Pilkington R, Berry J, Scalzi D, Gibson O, Brown A, et al. Identification of Aboriginal children using linked administrative data: Consequences for measuring inequalities. *Journal of paediatrics and child health*. 2016;52(5):534-40.
26. Lestina DC, Miller TR, Smith GS. Creating injury episodes using medical claims data. *Journal of Trauma and Acute Care Surgery*. 1998;45(3):565-9.
27. Australian Bureau of Statistics. Socio-Economic Indexes for Areas. [updated September 2013. Available from: <http://www.abs.gov.au/websitedbs/censushome.nsf/home/seifas>.
28. Australian Bureau of Statistics. Remoteness Structure. [Available from: <http://www.abs.gov.au/websitedbs/D3310114.nsf/home/remoteness+structure>.

- 1  
2  
3 29. Australian Institute of Health and Welfare. Australian Classification of Health Interventions  
4 (ACHI) 8th edition. [Available from: <http://meteor.aihw.gov.au/content/index.phtml/itemId/514008>.  
5
- 6 30. Birken CS, MacArthur C. Socioeconomic status and injury risk in children. *Paediatrics & Child  
7 Health*. 2004;9(5):323-5.  
8
- 9 31. Groom L, Kendrick D, Coupland C, Patel B, Hippisley-Cox J. Inequalities in hospital admission  
10 rates for unintentional poisoning in young children. *Injury Prevention*. 2006;12(3):166-70.  
11
- 12 32. Sherrard J, Sweidan M, Robinson J, Killian J, Brennan C, Ozanne-Smith J. Barriers to child  
13 poisoning prevention: Why does child resistant packaging fail? Melbourne: Monash University Accident  
14 Research Centre; 2005.  
15
- 16 33. Bailie RS, Wayte KJ. Housing and health in Indigenous communities: Key issues for housing and  
17 health improvement in remote Aboriginal and Torres Strait Islander communities. *Australian Journal of  
18 Rural Health*. 2006;14(5):178-83.  
19
- 20 34. Australian Institute of Health and Welfare (AIHW). Australia's health 2016. Canberra: AIHW;  
21 2016. Australia's health series no. 15. Cat no. AUS 199.  
22
- 23 35. Burghardt LC, Ayers JW, Brownstein JS, Bronstein AC, Ewald MB, Bourgeois FT. Adult  
24 prescription drug use and pediatric medication exposures and poisonings. *Pediatrics*. 2013;132(1):18-27.  
25
- 26 36. Jorm AF, Bouchier SJ, Cvetkovski S, Stewart G. Mental health of Indigenous Australians: a  
27 review of findings from community surveys. *Medical Journal of Australia*. 2012;196(2):118.  
28
- 29 37. Australian Medicines Handbook Adelaide: Australian Medicines Handbook Pty Ltd; 2017.  
30 [Available from: <https://amhonline.amh.net.au/>.  
31
- 32 38. Zubrick S, Lawrence D, Silburn S, Blair E, Milroy H, Wilkes E, et al. The Western Australian  
33 Aboriginal child health survey: The health of Aboriginal children and young people: Telethon Institute for  
34 Child Health Research; 2004.  
35
- 36 39. Shepherd CCJ, Li J, Mitrou F, Zubrick SR. Socioeconomic disparities in the mental health of  
37 Indigenous children in Western Australia. *BMC Public Health*. 2012;12:756-  
38
- 39 40. Sinha Y, Cranswick NE. Clonidine poisoning in children: a recent experience. *Journal of  
40 paediatrics and child health*. 2004;40(12):678-80.  
41
- 42 41. Zonfrillo MR, Melzer-Lange M, Gittelman MA. A comprehensive approach to pediatric injury  
43 prevention in the emergency department. *Pediatric emergency care*. 2014;30(1):56-62.  
44
- 45 42. Bennett B, Zubrzycki J, Bacon V. What Do We Know? The Experiences of Social Workers  
46 Working Alongside Aboriginal People. *Australian Social Work*. 2011;64(1):20-37.  
47
- 48 43. Therapeutic Goods Order No. 80 - Child-Resistant Packaging Requirements for Medicines  
49 (27/08/2008), (2008).  
50  
51  
52  
53  
54  
55  
56  
57  
58  
59  
60



- 1  
2  
3 44. Smithson J, Garside R, Pearson M. Barriers to, and facilitators of, the prevention of unintentional  
4 injury in children in the home: a systematic review and synthesis of qualitative research. *Injury*  
5 *Prevention*. 2011;17(2):119-26.  
6  
7  
8 45. Gibbs L, Waters E, Sherrard J, Ozanne-Smith J, Robinson J, Young S, et al. Understanding  
9 parental motivators and barriers to uptake of child poison safety strategies: a qualitative study. *Injury*  
10 *Prevention*. 2005;11(6):373-7.  
11  
12 46. Achana FA, Sutton AJ, Kendrick D, Wynn P, Young B, Jones DR, et al. The Effectiveness of  
13 Different Interventions to Promote Poison Prevention Behaviours in Households with Children: A  
14 Network Meta-Analysis. *PloS one*. 2015;10(4):e0121122.  
15  
16 47. Adams S, Elkington J, MacKay JM, K Z, O'Sullivan M, Vincenten K, et al. Child Safety Good  
17 Practice Guide: good investments in unintentional child injury prevention and safety promotion. Sydney:  
18 Sydney Children's Hospitals Network; 2016.  
19  
20 48. Senserrick T, Hinchcliff R, Ivers R, Boufous S, Martiniuk A, Clapham K. Aboriginal Injury  
21 Prevention Projects: A Rapid Review. Ultimo, Australia: Sax Institute for NSW Health and the George  
22 Institute. 2010.  
23  
24 49. Ivers R, Clapham K, Senserrick T, Lyford M, Stevenson M. Injury prevention in Australian  
25 Indigenous communities. *Injury*. 2008;39(Supplement 5):S61-S7.  
26  
27  
28  
29  
30  
31  
32  
33  
34  
35  
36  
37  
38  
39  
40  
41  
42  
43  
44  
45  
46  
47  
48  
49  
50  
51  
52  
53  
54  
55  
56  
57  
58  
59  
60

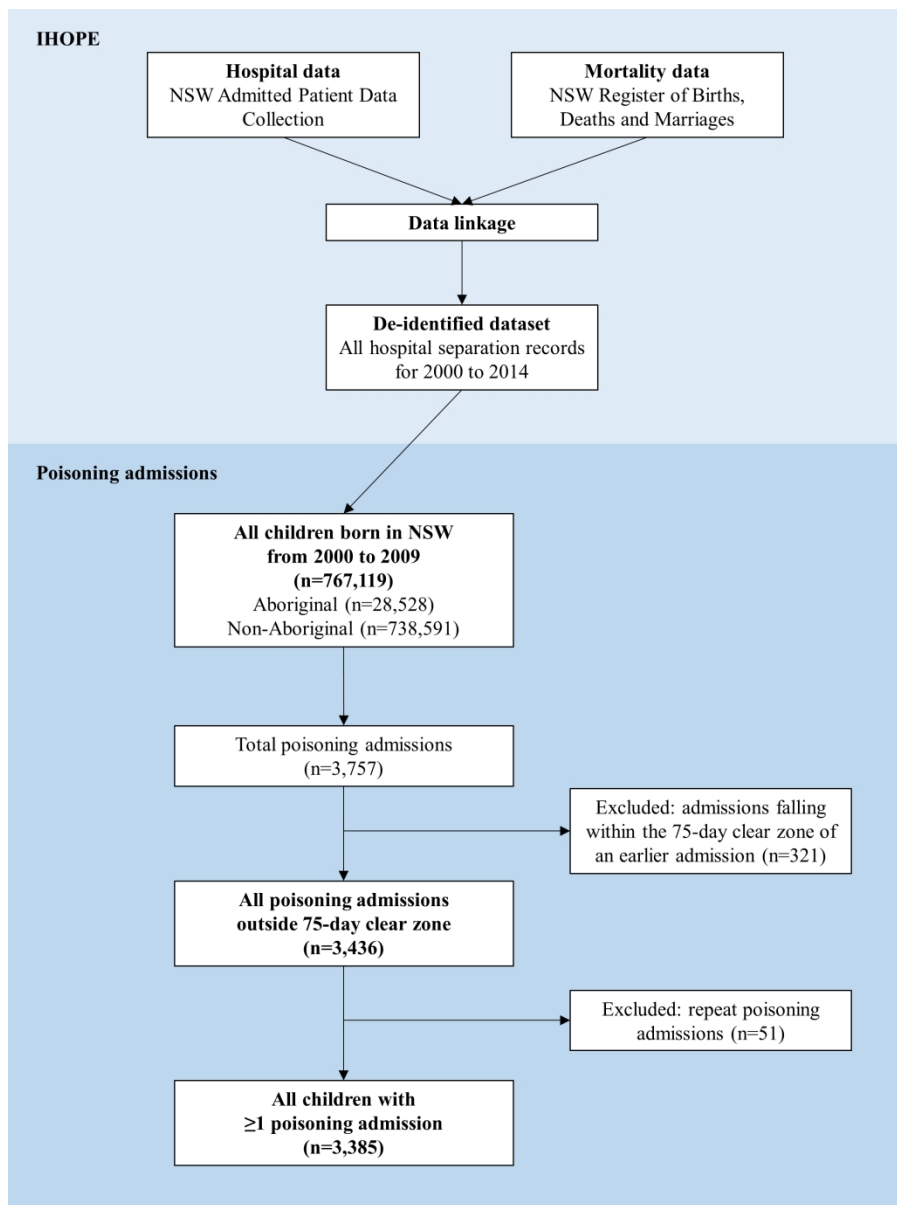

Figure 1: Indigenous Health Outcomes Patient Evaluation (IHOPE) data sources and study cohort selection

190x254mm (300 x 300 DPI)



Figure 2: Crude and adjusted odds ratios with 95% confidence intervals for poisoning hospitalisation, by demographic factors, Aboriginal and non-Aboriginal children, New South Wales, 2000-2014. Legend: OR: odds ratio, aOR: adjusted odds ratio, CI: confidence interval. Fully adjusted models included variables sex, area-level disadvantage, and geographic remoteness

38x21mm (600 x 600 DPI)

**Supplement 1: Comparison of results by Aboriginal identification method****Number of Aboriginal children, by identification method**

| Identification method        | Number of Aboriginal children identified |                           |
|------------------------------|------------------------------------------|---------------------------|
|                              | Cohort                                   | Poisoned (% total cohort) |
| Ever identified <sup>a</sup> | 28,528                                   | 382 (1.34)                |
| Most recent <sup>b</sup>     | 25,891                                   | 319 (1.23)                |
| Birth record <sup>c</sup>    | 21,576                                   | 246 (1.14)                |

<sup>a</sup>Child identified as Aboriginal in any APDC record between their birth and fifth birthday

<sup>b</sup>Child identified as Aboriginal in the most recent APDC record between their birth and fifth birthday

<sup>c</sup>Child identified as Aboriginal in their APDC birth record

**RQ1: Adjusted odds ratio of poisoning admission by demographic characteristics, Aboriginal and non-Aboriginal children, by identification method**

| Variables                        | Non-Aboriginal children<br>(n=738,591) | Aboriginal children                        |                                        |                                         |
|----------------------------------|----------------------------------------|--------------------------------------------|----------------------------------------|-----------------------------------------|
|                                  |                                        | Ever-identified <sup>c</sup><br>(n=28,528) | Most recent <sup>d</sup><br>(n=25,891) | Birth record <sup>e</sup><br>(n=21,576) |
| Logistic regression <sup>a</sup> | aOR <sup>b</sup> (95% CI)              | aOR (95% CI)                               | aOR (95% CI)                           | aOR (95% CI)                            |
| Sex                              |                                        |                                            |                                        |                                         |
| Female                           | 1                                      | 1                                          | 1                                      | 1                                       |
| Male                             | 1.17 (1.09-1.26)                       | 1.27 (1.03-1.56)                           | 1.34 (1.07-1.67)                       | 1.44 (1.12-1.87)                        |
| Area-level disadvantage          |                                        |                                            |                                        |                                         |
| 1 (Least disadvantaged)          | 1                                      | 1                                          | 1                                      | 1                                       |
| 2                                | 1.34 (1.21-1.48)                       | 1.84 (1.07-3.15)                           | 1.95 (1.00-3.82)                       | 1.90 (0.89-4.05)                        |
| 3 (Most disadvantaged)           | 1.64 (1.48-1.81)                       | 1.57 (0.92-2.69)                           | 1.71 (0.88-3.34)                       | 2.02 (0.96-4.27)                        |
| Remoteness                       |                                        |                                            |                                        |                                         |
| Major cities                     | 1                                      | 1                                          | 1                                      | 1                                       |
| Inner regional                   | 1.33 (1.22-1.44)                       | 1.06 (0.82-1.39)                           | 1.32 (0.97-1.79)                       | 1.01 (0.72-1.41)                        |
| Outer regional                   | 1.66 (1.47-1.87)                       | 1.39 (1.02-1.88)                           | 1.65 (1.17-2.34)                       | 1.10 (0.75-1.62)                        |
| Remote/Very remote               | 1.97 (1.46-2.66)                       | 1.18 (0.78-1.79)                           | 1.38 (0.87-2.17)                       | 1.10 (0.68-1.77)                        |

<sup>a</sup>Full model included all demographic variables (sex, disadvantage, remoteness)

<sup>b</sup>aOR: adjusted odds ratio

<sup>c</sup>Child identified as Aboriginal in any APDC record between their birth and fifth birthday

1  
2  
3  
4  
5  
6  
7  
8  
9  
10  
11  
12  
13  
14  
15  
16  
17  
18  
19  
20  
21  
22  
23  
24  
25  
26  
27  
28  
29  
30  
31  
32  
33  
34  
35  
36  
37  
38  
39  
40  
41  
42  
43  
44  
45  
46  
47

<sup>d</sup>Child identified as Aboriginal in the most recent APDC record between their birth and fifth birthday

<sup>e</sup>Child identified as Aboriginal in their APDC birth record

**RQ1: Age at admission, Aboriginal children, by identification method**

| Age (years)                       | Total<br><i>N</i> (column %) | Aboriginal children                                 |                                                 |                                                  |
|-----------------------------------|------------------------------|-----------------------------------------------------|-------------------------------------------------|--------------------------------------------------|
|                                   |                              | Ever-identified <sup>a</sup><br><i>N</i> (column %) | Most recent <sup>b</sup><br><i>N</i> (column %) | Birth record <sup>c</sup><br><i>N</i> (column %) |
| <1                                | 241 (7)                      | 21 (6)                                              | 18 (6)                                          | 13 (5)                                           |
| 1-2                               | 1048 (31)                    | 96 (25)                                             | 80 (25)                                         | 62 (25)                                          |
| 2-3                               | 1363 (40)                    | 152 (40)                                            | 127 (40)                                        | 95 (39)                                          |
| 3-4                               | 519 (15)                     | 73 (19)                                             | 59 (19)                                         | 46 (19)                                          |
| 4-5                               | 214 (6)                      | 40 (10)                                             | 35 (11)                                         | 30 (12)                                          |
| Total number of children poisoned | 3385 (100)                   | 382 (100)                                           | 319 (100)                                       | 246 (100)                                        |

<sup>a</sup>Child identified as Aboriginal in any APDC record between their birth and fifth birthday

<sup>b</sup>Child identified as Aboriginal in the most recent APDC record between their birth and fifth birthday

<sup>c</sup>Child identified as Aboriginal in their APDC birth record

For peer review only

## RQ2: Poisoning agents, Aboriginal children, by identification method

| ICD-10 Diagnosis Code                                                                 | Aboriginal children N (%) |                              |                          |                           |
|---------------------------------------------------------------------------------------|---------------------------|------------------------------|--------------------------|---------------------------|
|                                                                                       | Total N (%)               | Ever-identified <sup>a</sup> | Most recent <sup>b</sup> | Birth record <sup>c</sup> |
| T36-65: All poisoning admissions                                                      | 3,436 (100)               | 391 (11)                     | 327 (10)                 | 251 (7)                   |
| T36-50: Pharmaceutical <sup>d</sup>                                                   | 2,859 (83)                | 318 (81)                     | 261 (80)                 | 207 (82)                  |
| T51-65: Non-pharmaceutical <sup>d</sup>                                               | 588 (17)                  | 76 (19)                      | 69 (21)                  | 46 (18)                   |
| <i>Pharmaceutical Agents</i>                                                          |                           |                              |                          |                           |
| T36-37: Antibiotics, anti-infectives, anti-parasitics <sup>e</sup>                    | 47 (1)                    | 7 (2)                        | 4 (1)                    | 6 (2)                     |
| T38: Hormones and synthetic substitutes                                               | 141 (4)                   | 22 (6)                       | 18 (6)                   | 14 (7)                    |
| <b>T38.3: Insulin and oral hypoglycemic drugs</b>                                     | <b>96 (3)</b>             | <b>17 (4)</b>                | <b>15 (5)</b>            | <b>11 (4)</b>             |
| T39: Nonopioid analgesics, antipyretics and antirheumatics                            | 493 (14)                  | 31 (8)                       | 23 (7)                   | 18 (7)                    |
| <b>T39.1: 4-aminophenol derivatives</b>                                               | <b>374 (11)</b>           | <b>24 (6)</b>                | <b>19 (6)</b>            | <b>16 (6)</b>             |
| T40 Narcotics and hallucinogens                                                       | 178 (5)                   | 25 (6)                       | 20 (6)                   | 19 (8)                    |
| T41: Poisoning by anaesthetics and therapeutic gases                                  | 14 (0)                    | 0 (0)                        | 0 (0)                    | 0 (0)                     |
| T42: Antiepileptic, sedative-hypnotic and antiparkinsonism                            | 492 (14)                  | 66 (17)                      | 57 (17)                  | 46 (18)                   |
| <b>T42.4: Benzodiazepines</b>                                                         | <b>370 (11)</b>           | <b>55 (14)</b>               | <b>48 (15)</b>           | <b>38 (15)</b>            |
| T43: Psychotropic drugs, not elsewhere classified                                     | 394 (11)                  | 55 (14)                      | 47 (14)                  | 36 (14)                   |
| <b>T43.2: Other and unspecified antidepressants</b>                                   | <b>149 (4)</b>            | <b>15 (4)</b>                | <b>11 (3)</b>            | <b>9 (4)</b>              |
| T44: Autonomic nervous system drugs                                                   | 251 (7)                   | 19 (5)                       | 12 (4)                   | 12 (5)                    |
| <b>T44.3: Other parasympatholytics and spasmolytics, not elsewhere classified</b>     | <b>93 (3)</b>             | <b>7 (2)</b>                 | <b>5 (2)</b>             | <b>5 (2)</b>              |
| <b>T44.7: Beta adrenoreceptor antagonists, not elsewhere classified</b>               | <b>105 (3)</b>            | <b>7 (2)</b>                 | <b>3 (1)</b>             | <b>4 (2)</b>              |
| T45: Systemic and haematological agents                                               | 286 (8)                   | 23 (6)                       | 14 (4)                   | 12 (5)                    |
| <b>T45.0: Antiallergic and antiemetic drugs</b>                                       | <b>150 (4)</b>            | <b>14 (4)</b>                | <b>10 (3)</b>            | <b>8 (3)</b>              |
| <b>T45.4: Iron and its compounds</b>                                                  | <b>83 (2)</b>             | <b>r</b>                     | <b>r</b>                 | <b>r</b>                  |
| T46: Cardiovascular system drugs                                                      | 382 (11)                  | 56 (14)                      | 52 (16)                  | 34 (14)                   |
| <b>T46.5: Other antihypertensives, not elsewhere classified</b>                       | <b>211 (6)</b>            | <b>38 (10)</b>               | <b>35 (11)</b>           | <b>21 (8)</b>             |
| T47: Gastrointestinal system drugs                                                    | 80 (2)                    | 8 (2)                        | 6 (2)                    | 6 (2)                     |
| T48: Smooth and skeletal muscle and respiratory system agents                         | 98 (3)                    | 6 (2)                        | 4 (1)                    | 5 (2)                     |
| T49: Topical agents and ophthalmological, otorhinolaryngological and dental drugs     | 143 (4)                   | 12 (3)                       | 9 (3)                    | 8 (3)                     |
| T50: Diuretics and other and unspecified drugs, medicaments and biological substances | 207 (6)                   | 22 (6)                       | 17 (5)                   | 15 (6)                    |
| <b>T50.9: Other and unspecified drugs, medicaments and biologicals</b>                | <b>94 (3)</b>             | <b>10 (3)</b>                | <b>10 (3)</b>            | <b>5 (2)</b>              |

1  
2  
3  
4  
5  
6  
7  
8  
9  
10  
11  
12  
13  
14  
15  
16  
17  
18  
19  
20  
21  
22  
23  
24  
25  
26  
27  
28  
29  
30  
31  
32  
33  
34  
35  
36  
37  
38  
39  
40  
41  
42  
43  
44  
45  
46  
47

| <i>Non-pharmaceutical agents</i>                                                |         |        |        |        |
|---------------------------------------------------------------------------------|---------|--------|--------|--------|
| T51: Toxic effect of alcohol                                                    | 35 (1)  | 5 (1)  | 4 (1)  | 2 (1)  |
| T52: Toxic effect of organic solvents                                           | 185 (5) | 22 (6) | 19 (6) | 14 (6) |
| T53: Toxic effect of halogen derivatives of aliphatic and aromatic hydrocarbons | 10 (0)  | 0 (0)  | 0 (0)  | 0 (0)  |
| T54-55: Toxic effect of corrosive substances, soaps and detergents <sup>e</sup> | 132 (4) | 17 (4) | 15 (5) | 9 (4)  |
| T57: Toxic effect of other inorganic substances                                 | 0 (0)   | 0 (0)  | 0 (0)  | 0 (0)  |
| T60: Toxic effect of pesticides                                                 | 106 (3) | 12 (3) | 12 (4) | 5 (2)  |
| T65: Toxic effect of other and unspecified substances                           | 124 (4) | 21 (5) | 20 (6) | 16 (6) |

<sup>a</sup> Child identified as Aboriginal in any APDC record between their birth and fifth birthday

<sup>b</sup> Child identified as Aboriginal in the most recent APDC record between their birth and fifth birthday

<sup>c</sup> Child identified as Aboriginal in their APDC birth record

<sup>d</sup> May exceed total number of poisoning admissions due to multiple agents per admission

<sup>e</sup> Categories combined due to small cell numbers

<sup>f</sup> Suppressed due to small cell numbers

### RQ3: Clinical outcomes, Aboriginal children, by identification method

| Clinical outcomes                                              | Total N (%) | Aboriginal children N (%)    |                          |                           |
|----------------------------------------------------------------|-------------|------------------------------|--------------------------|---------------------------|
|                                                                |             | Ever-identified <sup>a</sup> | Most recent <sup>b</sup> | Birth record <sup>c</sup> |
| Total number of poisoning admissions                           | 3,436 (100) | 391 (100)                    | 327 (100)                | 251 (100)                 |
| Repeat admissions                                              | 51 (1)      | 9 (2)                        | 8 (2)                    | 5 (2)                     |
| Length of stay (days)                                          |             |                              |                          |                           |
| <1                                                             | 1,210 (35)  | 125 (32)                     | 102 (31)                 | 75 (30)                   |
| 1                                                              | 1,932 (56)  | 225 (58)                     | 193 (59)                 | 150 (60)                  |
| 2                                                              | 183 (5)     | 25 (6)                       | 19 (6)                   | 17 (7)                    |
| 3+                                                             | 111 (3)     | 16 (4)                       | 13 (4)                   | 9 (4)                     |
| Total number of procedures                                     | 374 (11)    | 39 (10)                      | 33 (10)                  | 26 (10)                   |
| Allied health interventions                                    | 260 (8)     | 27 (7)                       | 24 (7)                   | 20 (8)                    |
| Airway and ventilation                                         | 37 (1)      | 5 (1)                        | 3 (1)                    | 3 (1)                     |
| Other (including diagnostics and pharmacotherapy) <sup>d</sup> | 77 (2)      | 7 (2)                        | 6 (2)                    | 3 (1)                     |

<sup>a</sup> Child identified as Aboriginal in any APDC record between their birth and fifth birthday

<sup>b</sup> Child identified as Aboriginal in the most recent APDC record between their birth and fifth birthday

<sup>c</sup> Child identified as Aboriginal in their APDC birth record

<sup>d</sup> Combined due to small cell numbers

## Supplement 2: Included and excluded poisoning agents, by ICD-10-AM code

---

### Included agents

---

#### *Pharmaceutical Agents*

- T36: Poisoning by systemic antibiotics
- T37: Poisoning by other systemic anti-infectives and antiparasitics
- T38: Poisoning by hormones and their synthetic substitutes and antagonists, not elsewhere classified
- T39: Poisoning by nonopioid analgesics, antipyretics and antirheumatics
- T40: Poisoning by narcotics and psychodysleptics [hallucinogens]
- T41: Poisoning by anaesthetics and therapeutic gases
- T42: Poisoning by antiepileptic, sedative-hypnotic and antiparkinsonism drugs
- T43: Poisoning by psychotropic drugs, not elsewhere classified
- T44: Poisoning by drugs primarily affecting the autonomic nervous system
- T45: Poisoning by primarily systemic and haematological agents, not elsewhere classified
- T46: Poisoning by agents primarily affecting the cardiovascular system
- T47: Poisoning by agents primarily affecting the gastrointestinal system
- T48: Poisoning by agents primarily acting on smooth and skeletal muscle and respiratory system
- T49: Poisoning by topical agents primarily affecting skin and mucosal membrane and by ophthalmological, otorhinolaryngological and dental drugs
- T50: Diuretics and other and unspecified drugs, medicaments and biological substances

---

#### *Non pharmaceutical agents*

- T51: Toxic effect of alcohol
- T52: Toxic effect of organic solvents
- T53: Toxic effect of halogen derivatives of aliphatic and aromatic hydrocarbons
- T54: Toxic effect of corrosive substances
- T55: Toxic effect of soaps and detergents
- T57: Toxic effect of other inorganic substances
- T60: Toxic effect of pesticides
- T65: Toxic effect of other and unspecified substances

---

### Excluded agents

---

- T56: Toxic effect of metals (*includes lead, mercury*)
- T58: Toxic effect of carbon monoxide
- T59: Toxic effect of other gases, fumes and vapours
- T61: Toxic effect of noxious substances eaten as food (*includes fish, shellfish*)
- T62: Toxic effect of other noxious substances eaten as food (*includes mushrooms, berries*)
- T63: Toxic effect of contact with venomous animals
- T64: Toxic effect of aflatoxin and other mycotoxins
-



## STROBE Statement—checklist of items that should be included in reports of observational studies

|                           | Item No | Recommendation                                                                                                                                                                             | Completed (page)                                                                                                                                                                                          |
|---------------------------|---------|--------------------------------------------------------------------------------------------------------------------------------------------------------------------------------------------|-----------------------------------------------------------------------------------------------------------------------------------------------------------------------------------------------------------|
| <b>Title and abstract</b> | 1       | (a) Indicate the study's design with a commonly used term in the title or the abstract                                                                                                     | Yes (2)                                                                                                                                                                                                   |
|                           |         | (b) Provide in the abstract an informative and balanced summary of what was done and what was found                                                                                        | Yes (2)                                                                                                                                                                                                   |
| <b>Introduction</b>       |         |                                                                                                                                                                                            |                                                                                                                                                                                                           |
| Background/rationale      | 2       | Explain the scientific background and rationale for the investigation being reported                                                                                                       | Yes (4)                                                                                                                                                                                                   |
| Objectives                | 3       | State specific objectives, including any prespecified hypotheses                                                                                                                           | Yes (4)                                                                                                                                                                                                   |
| <b>Methods</b>            |         |                                                                                                                                                                                            |                                                                                                                                                                                                           |
| Study design              | 4       | Present key elements of study design early in the paper                                                                                                                                    | Yes (6)                                                                                                                                                                                                   |
| Setting                   | 5       | Describe the setting, locations, and relevant dates, including periods of recruitment, exposure, follow-up, and data collection                                                            | Yes (6)                                                                                                                                                                                                   |
| Participants              | 6       | (a) <i>Cohort study</i> —Give the eligibility criteria, and the sources and methods of selection of participants. Describe methods of follow-up                                            | Cohort study:<br>Eligibility criteria and methods of selection included<br>(6)                                                                                                                            |
|                           |         | <i>Case-control study</i> —Give the eligibility criteria, and the sources and methods of case ascertainment and control selection. Give the rationale for the choice of cases and controls |                                                                                                                                                                                                           |
|                           |         | <i>Cross-sectional study</i> —Give the eligibility criteria, and the sources and methods of selection of participants                                                                      |                                                                                                                                                                                                           |
|                           |         | (b) <i>Cohort study</i> —For matched studies, give matching criteria and number of exposed and unexposed                                                                                   |                                                                                                                                                                                                           |
|                           |         | <i>Case-control study</i> —For matched studies, give matching criteria and the number of controls per case                                                                                 |                                                                                                                                                                                                           |
| Variables                 | 7       | Clearly define all outcomes, exposures, predictors, potential confounders, and effect modifiers. Give diagnostic criteria, if applicable                                                   | Outcomes, exposures, predictors (logistic regression model, demographic predictor variables)<br>ICD-10 diagnostic codes described (full list of included/excluded codes available in Supplement 2)<br>(7) |
| Data sources/measurement  | 8*      | For each variable of interest, give sources of data and details of methods of assessment (measurement). Describe comparability of assessment methods if there is more than one group       | Yes (6)                                                                                                                                                                                                   |
| Bias                      | 9       | Describe any efforts to address potential sources of bias                                                                                                                                  | “Clear zone” method used to reduce potential overcounting of hospital admissions related to same incident                                                                                                 |

presentation (7)

Use of ever-identified identification method may introduce bias in that children who are more frequently sick, and present to hospital more times, are more likely to be identified.

|                        |    |                                                                                                                                                                                                                                                                                                                                                                                                                                                                                                                                                                   |                                                                   |
|------------------------|----|-------------------------------------------------------------------------------------------------------------------------------------------------------------------------------------------------------------------------------------------------------------------------------------------------------------------------------------------------------------------------------------------------------------------------------------------------------------------------------------------------------------------------------------------------------------------|-------------------------------------------------------------------|
| Study size             | 10 | Explain how the study size was arrived at                                                                                                                                                                                                                                                                                                                                                                                                                                                                                                                         | (9)                                                               |
| Quantitative variables | 11 | Explain how quantitative variables were handled in the analyses.<br>If applicable, describe which groupings were chosen and why                                                                                                                                                                                                                                                                                                                                                                                                                                   |                                                                   |
| Statistical methods    | 12 | (a) Describe all statistical methods, including those used to control for confounding<br>(b) Describe any methods used to examine subgroups and interactions<br>(c) Explain how missing data were addressed<br>(d) <i>Cohort study</i> —If applicable, explain how loss to follow-up was addressed<br><i>Case-control study</i> —If applicable, explain how matching of cases and controls was addressed<br><i>Cross-sectional study</i> —If applicable, describe analytical methods taking account of sampling strategy<br>(e) Describe any sensitivity analyses | Yes (7-8)<br><br><br><br><br><br><br><br><br><br><br><br>Yes (16) |

Continued on next page

1  
2  
3  
4  
5  
6  
7  
8  
9  
10  
11  
12  
13  
14  
15  
16  
17  
18  
19  
20  
21  
22  
23  
24  
25  
26  
27  
28  
29  
30  
31  
32  
33  
34  
35  
36  
37  
38  
39  
40  
41  
42  
43  
44  
45  
46  
47  
48  
49  
50  
51  
52  
53  
54  
55  
56  
57  
58  
59  
60

| <b>Results</b>           |     |                                                                                                                                                                                                              |                                                               |
|--------------------------|-----|--------------------------------------------------------------------------------------------------------------------------------------------------------------------------------------------------------------|---------------------------------------------------------------|
| Participants             | 13* | (a) Report numbers of individuals at each stage of study—eg numbers potentially eligible, examined for eligibility, confirmed eligible, included in the study, completing follow-up, and analysed            | Yes (9)                                                       |
|                          |     | (b) Give reasons for non-participation at each stage                                                                                                                                                         | N/A                                                           |
|                          |     | (c) Consider use of a flow diagram                                                                                                                                                                           | Yes                                                           |
| Descriptive data         | 14* | (a) Give characteristics of study participants (eg demographic, clinical, social) and information on exposures and potential confounders                                                                     | Yes (Table 1) (9)                                             |
|                          |     | (b) Indicate number of participants with missing data for each variable of interest                                                                                                                          | N/A                                                           |
|                          |     | (c) <i>Cohort study</i> —Summarise follow-up time (eg, average and total amount)                                                                                                                             | Yes (9)                                                       |
| Outcome data             | 15* | <i>Cohort study</i> —Report numbers of outcome events or summary measures over time                                                                                                                          | Yes (9)                                                       |
|                          |     | <i>Case-control study</i> —Report numbers in each exposure category, or summary measures of exposure                                                                                                         |                                                               |
|                          |     | <i>Cross-sectional study</i> —Report numbers of outcome events or summary measures                                                                                                                           |                                                               |
| Main results             | 16  | (a) Give unadjusted estimates and, if applicable, confounder-adjusted estimates and their precision (eg, 95% confidence interval). Make clear which confounders were adjusted for and why they were included | Unadjusted and adjusted odds ratios presented with 95% CI (9) |
|                          |     | (b) Report category boundaries when continuous variables were categorized                                                                                                                                    | N/A                                                           |
|                          |     | (c) If relevant, consider translating estimates of relative risk into absolute risk for a meaningful time period                                                                                             | N/A                                                           |
| Other analyses           | 17  | Report other analyses done—eg analyses of subgroups and interactions, and sensitivity analyses                                                                                                               | Sensitivity analyses described (16)                           |
| <b>Discussion</b>        |     |                                                                                                                                                                                                              |                                                               |
| Key results              | 18  | Summarise key results with reference to study objectives                                                                                                                                                     | Yes (17)                                                      |
| Limitations              | 19  | Discuss limitations of the study, taking into account sources of potential bias or imprecision. Discuss both direction and magnitude of any potential bias                                                   | Limitations described (18)                                    |
| Interpretation           | 20  | Give a cautious overall interpretation of results considering objectives, limitations, multiplicity of analyses, results from similar studies, and other relevant evidence                                   | Yes (17)                                                      |
| Generalisability         | 21  | Discuss the generalisability (external validity) of the study results                                                                                                                                        | Implications of study findings described (19)                 |
| <b>Other information</b> |     |                                                                                                                                                                                                              |                                                               |
| Funding                  | 22  | Give the source of funding and the role of the funders for the present study and, if applicable, for the original study on which the present article is based                                                | Yes (21)                                                      |

\*Give information separately for cases and controls in case-control studies and, if applicable, for exposed and unexposed groups in cohort and cross-sectional studies.

1  
2  
3 **Note:** An Explanation and Elaboration article discusses each checklist item and gives methodological background and  
4 published examples of transparent reporting. The STROBE checklist is best used in conjunction with this article (freely  
5 available on the Web sites of PLoS Medicine at <http://www.plosmedicine.org/>, Annals of Internal Medicine at  
6 <http://www.annals.org/>, and Epidemiology at <http://www.epidem.com/>). Information on the STROBE Initiative is  
7 available at [www.strobe-statement.org](http://www.strobe-statement.org).  
8  
9  
10  
11  
12  
13  
14  
15  
16  
17  
18  
19  
20  
21  
22  
23  
24  
25  
26  
27  
28  
29  
30  
31  
32  
33  
34  
35  
36  
37  
38  
39  
40  
41  
42  
43  
44  
45  
46  
47  
48  
49  
50  
51  
52  
53  
54  
55  
56  
57  
58  
59  
60

# BMJ Open

## Demographic and clinical characteristics of hospitalised unintentional poisoning in Aboriginal and non-Aboriginal preschool children in New South Wales, Australia: a population data linkage study

|                                 |                                                                                                                                                                                                                                                                                                                                                                                                                                                                                                                                                                                                                          |
|---------------------------------|--------------------------------------------------------------------------------------------------------------------------------------------------------------------------------------------------------------------------------------------------------------------------------------------------------------------------------------------------------------------------------------------------------------------------------------------------------------------------------------------------------------------------------------------------------------------------------------------------------------------------|
| Journal:                        | <i>BMJ Open</i>                                                                                                                                                                                                                                                                                                                                                                                                                                                                                                                                                                                                          |
| Manuscript ID                   | bmjopen-2018-022633.R2                                                                                                                                                                                                                                                                                                                                                                                                                                                                                                                                                                                                   |
| Article Type:                   | Research                                                                                                                                                                                                                                                                                                                                                                                                                                                                                                                                                                                                                 |
| Date Submitted by the Author:   | 23-Nov-2018                                                                                                                                                                                                                                                                                                                                                                                                                                                                                                                                                                                                              |
| Complete List of Authors:       | Lee, Caroline; University of New South Wales - Randwick Campus, Hanly, Mark; University of New South Wales, Centre for Big Data Research in Health<br>Larter, Natasha; Sydney Children's Hospitals Network Randwick and Westmead, Community Child Health<br>Zwi, Karen; Sydney Children's Hospitals Network Randwick and Westmead, Community Child Health; University of New South Wales<br>Woolfenden, Susan ; Sydney Children's Hospitals Network Randwick and Westmead, Community Child Health; University of New South Wales,<br>Jorm, Louisa; University of New South Wales, Centre for Big Data Research in Health |
| <b>Primary Subject Heading</b>: | Paediatrics                                                                                                                                                                                                                                                                                                                                                                                                                                                                                                                                                                                                              |
| Secondary Subject Heading:      | Public health                                                                                                                                                                                                                                                                                                                                                                                                                                                                                                                                                                                                            |
| Keywords:                       | Child, preschool, Poisoning, Aboriginal, Data linkage, unintentional injury                                                                                                                                                                                                                                                                                                                                                                                                                                                                                                                                              |
|                                 |                                                                                                                                                                                                                                                                                                                                                                                                                                                                                                                                                                                                                          |

SCHOLARONE™  
Manuscripts

1  
2  
3 **Title:** Demographic and clinical characteristics of hospitalised unintentional poisoning in  
4 Aboriginal and non-Aboriginal preschool children in New South Wales, Australia: a population  
5 data linkage study  
6  
7

8  
9 **Corresponding author:** Caroline Lee, University of New South Wales, High St, Kensington  
10 2052, [caroline.lee@unsw.edu.au](mailto:caroline.lee@unsw.edu.au)  
11

12  
13 **Co-Authors:**

14  
15 Caroline Lee, University of New South Wales, Sydney, Australia  
16

17  
18 Mark Hanly, Centre for Big Data Research in Health, University of New South Wales, Sydney,  
19 Australia  
20

21  
22 Natasha Larter, Department of Community Child Health, Sydney Children's Hospital Network,  
23 Sydney, Australia  
24

25  
26 Karen Zwi, Department of Community Child Health, Sydney Children's Hospital Network,  
27 Sydney, Australia; University of New South Wales, Sydney, Australia  
28

29  
30 Susan Woolfenden, Department of Community Child Health, Sydney Children's Hospital  
31 Network, Sydney, Australia; University of New South Wales, Sydney, Australia  
32

33  
34 Louisa Jorm, Centre for Big Data Research in Health, University of New South Wales, Sydney,  
35 Australia  
36

37  
38 **Keywords [MeSH]:** poisoning; child, preschool; accidents; Oceanic Ancestry Group;  
39 hospitalization/statistics and numerical data  
40

41  
42  
43 **Word count:** 2991  
44  
45  
46  
47  
48  
49  
50  
51  
52  
53  
54  
55  
56  
57  
58  
59  
60

1  
2  
3 **Demographic and clinical characteristics of hospitalised unintentional poisoning in Aboriginal and**  
4 **non-Aboriginal preschool children in New South Wales, Australia: a population data linkage study**  
5  
6  
7

8  
9 **Abstract**  
10

11 **Objectives:** To investigate differences in demographic and clinical characteristics of Aboriginal and non-  
12 Aboriginal children aged 0-4 years hospitalised for unintentional poisoning in New South Wales (NSW),  
13 Australia.  
14  
15

16  
17 **Design and setting:** Retrospective whole-of-population cohort analysis of linked hospital and mortality  
18 data for 2000-2014  
19

20  
21 **Participants:** All children (Aboriginal and non-Aboriginal) under the age of five years who born in a  
22 hospital in NSW from 2000 to 2009  
23

24  
25 **Outcomes:** The primary outcome was hospitalisation for unintentional poisoning. Logistic regression was  
26 used to estimate odds of poisoning hospitalisation for Aboriginal and non-Aboriginal children. Poisoning  
27 agents and clinical outcomes were compared by Aboriginality.  
28  
29

30  
31 **Results:** The cohort included 767,119 children, including 28,528 (3.7%) Aboriginal children. Aboriginal  
32 children had approximately three times higher rates of hospitalised poisoning (1.34%) compared to non-  
33 Aboriginal children (0.41%). Poisoning incidence peaked at 2-3 years of age. Male sex, socioeconomic  
34 disadvantage and geographic remoteness were associated with higher odds of poisoning hospitalisation  
35 for Aboriginal and non-Aboriginal children, but associations with disadvantage and remoteness were  
36 statistically significant only for non-Aboriginal children. Most (83%) poisonings were caused by  
37 pharmaceutical agents. Few Aboriginal and non-Aboriginal children had repeat admissions for poisoning;  
38 most had a length of stay of one day or less. Only 8% of poisoning admissions involved contact with a  
39 social worker.  
40  
41  
42  
43  
44

45  
46 **Conclusion:** Commonly used medications in the general population contribute to poisonings amongst  
47 both Aboriginal and non-Aboriginal preschool aged children. This study highlights a need to develop  
48 culturally safe poisoning prevention strategies and policies.  
49  
50

51  
52 **Strengths and limitations of this study**  
53  
54  
55  
56  
57  
58  
59  
60

- 1  
2  
3  
4  
5  
6  
7  
8  
9  
10  
11  
12  
13  
14  
15  
16  
17  
18  
19  
20  
21  
22  
23  
24  
25  
26  
27  
28  
29  
30  
31  
32  
33  
34  
35  
36  
37  
38  
39  
40  
41  
42  
43  
44  
45  
46  
47  
48  
49  
50  
51  
52  
53  
54  
55  
56  
57  
58  
59  
60
- This study's strengths include its focus on preschool-aged children, large sample size due to the whole-of-population design, and minimal recall bias due to the use of routinely collected administrative data.
  - However, the use of administrative data limited the available covariates, so risk factors such as parent demographics, supervision and storage practice, and clinical information such as symptoms and treatment details, could not be examined.
  - Children were identified as Aboriginal if they had been recorded at least once as Aboriginal ('ever-identified' algorithm), which enhances the proportion of Aboriginal children recorded using hospital data but may introduce bias in that sicker children with more frequent hospitalisations have more opportunities for identification.
  - Our analysis of poisoning agents was limited to the International Classification of Diseases 10<sup>th</sup> edition (ICD-10) taxonomy, and in some circumstances it was not possible to determine specific agents, for example, 'other' categories.



## Introduction

Poisoning is a leading cause of childhood injury worldwide.[1] Preschool children (0-4 years) have a higher risk of poisoning related hospital admissions [2-4] due to their developmental stage [5] and are a priority for prevention. Amongst preschool children, poisoning incidence peaks at two to three years of age,[3, 5-8] reflecting their increased mobility and exploratory skills.[5, 6, 9]

Pharmaceutical substances, such as over-the-counter and prescription medications, cause most unintentional poisonings in Australia.[4] Amongst preschool children in Australia, the most common causes of hospitalised pharmaceutical poisoning include analgesic, anti-epileptic, psychotropic, and other systemic and cardiovascular medications.[3, 4, 7, 10-12]

Various demographic and socioeconomic risk factors contribute to poisoning amongst preschool children. Factors relating to the child (male, higher birth order), parents (younger age, perinatal depression, alcohol misuse), unsafe storage and socioeconomic deprivation are associated with increased poisoning risk.[1-3, 7, 8, 13-16] In Australia, remote areas also have higher poisoning rates.[4, 16]

Poisoning represents one of the largest Indigenous child health inequalities in high-income countries, with rate ratios for hospitalisation and mortality ranging from 1.1 to 3.9 and 1.2 to 15.4 respectively.[17] A recent whole-of-population study in New South Wales, Australia reported that Aboriginal children had nearly three times higher risk of poisoning hospitalisation compared with non-Aboriginal children.[18] Existing studies about poisoning amongst Indigenous children in high-income countries have limitations, such as the lack of a non-Indigenous comparison group and wide age ranges up to 18 years old that do not differentiate younger children.[19, 20] Previous Australian studies of poisoning amongst preschool children in the general population have not focussed on Aboriginal children.[3, 5, 7, 21] The current literature about poisoning amongst Aboriginal children in Australia is limited in its examination of risk factors and clinical outcomes.[11, 12, 18, 22] Specific poisoning agents and clinical outcomes of poisoning for Aboriginal children have not been described.[2, 10, 16, 23]

This is the first study to examine the characteristics of unintentional poisoning amongst preschool-aged Aboriginal Australian children. The study aimed to answer questions that will inform prevention efforts for this at-risk group during a time of peak incidence:

- 1) Are the demographic risk factors for poisoning (sex, socioeconomic status and geographic remoteness) similar for both Aboriginal and non-Aboriginal children?
- 2) Which agents most frequently result in poisoning hospitalisation and are they different for Aboriginal and non-Aboriginal children?

1  
2  
3  
4  
5  
6  
7  
8  
9  
10  
11  
12  
13  
14  
15  
16  
17  
18  
19  
20  
21  
22  
23  
24  
25  
26  
27  
28  
29  
30  
31  
32  
33  
34  
35  
36  
37  
38  
39  
40  
41  
42  
43  
44  
45  
46  
47  
48  
49  
50  
51  
52  
53  
54  
55  
56  
57  
58  
59  
60

3) Are the clinical outcomes from hospitalised poisoning similar for Aboriginal and non-Aboriginal children?

For peer review only

## Methods

### Study design and setting

This was a retrospective, whole-of-population cohort study using linked hospital and mortality data for NSW, Australia for the period 2000 to 2014. In 2011, NSW had a population of 7,218,529 people, of whom an estimated 208,476 (2.9%) were Aboriginal or Torres Strait Islander.[24]

### Data Sources

This study was part of the Indigenous Health Outcomes Patient Evaluation (IHOPE) project which compares health outcomes for Aboriginal and non-Aboriginal people in NSW using linked hospital and mortality data (Figure 1). Hospital data were sourced from the Admitted Patient Data Collection (APDC) and mortality data from the NSW Register of Births, Deaths and Marriages (RBDM). Probabilistic data linkage was performed by the NSW Centre for Health Record Linkage (<http://www.cherel.org.au>). De-identified, linked datasets were supplied to the researchers.

The RBDM contains details for all deaths in NSW. The APDC contains records for all inpatient separations (discharges, transfers and deaths) for all public and private hospitals and day procedure centres in NSW. Each separation record contains information about patient demographics, diagnoses, and procedures. Diagnoses are coded according to the International Classification of Diseases and Related Problems Australian Modification, tenth revision (ICD-10-AM). Separations are hereafter referred to as hospital admissions.

### Participants

Children born in a NSW hospital between June 1, 2000 and March 31, 2009 were followed from birth until their fifth birthday. Birth records were identified from the APDC dataset using the criteria of 'live born infant' (ICD-10-AM code Z38) in any diagnosis field. This birth cohort has been previously described.[18]

### Aboriginal status

Aboriginal status is routinely recorded in the APDC. The main analyses used an 'ever identified' algorithm that coded children as Aboriginal if they were ever identified as Aboriginal, yielding higher proportions of Aboriginal children compared to the most recent record or birth record (Supplement 1).[25] To test the sensitivity of this identification method, all analyses were repeated using Aboriginality defined by the most recent record or birth record.

### Study variables

1  
2  
3 The main outcome was hospitalisation for unintentional poisoning, defined as an acute accidental  
4 exposure to, or overdose of, a toxic substance, whether accessed by a child or incorrectly administered by  
5 another person (wrong dosage, agent or frequency). The study focussed on ingested poisoning agents  
6 likely to require similar prevention approaches, including pharmaceutical (over-the-counter and  
7 prescription) and non-pharmaceutical agents, and excluding environmental exposures (Supplement 2).  
8 Poisoning cases were identified by a primary diagnosis of injury with an ICD-10-AM code T36-65,  
9 excluding toxic effect of metals (T56), carbon monoxide and other gases (T58-59) and noxious  
10 substances, venoms and food substances (T61-64).  
11  
12  
13  
14  
15

16 A poisoning admission was defined from the start date of an episode of care, to the date of separation or  
17 death. Multiple hospital admissions within a short time could be due to follow-up visits, transfer between  
18 hospitals, or change in care type within a hospital, related to the same poisoning event. Records falling  
19 within 75 days after the initial poisoning admission were excluded, based on the published 'clear zone'  
20 for poisoning.[26]  
21  
22  
23  
24

25 Available demographic variables included child's age, sex and area-level variables for socioeconomic  
26 disadvantage (Australian Bureau of Statistics Socioeconomic Indices for Areas (SEIFA) Index of Relative  
27 Socioeconomic Advantage and Disadvantage (IRSAD) [27]) and remoteness (Accessibility/Remoteness  
28 Index of Australia (ARIA) [28]) based on the child's statistical local area of residence at birth. Due to  
29 small numbers in some categories, IRSAD was divided into tertiles, and ARIA into four categories  
30 'Major Cities', 'Inner Regional', 'Outer Regional' and 'Remote/Very Remote' as used previously.[18]  
31 The age of first poisoning hospitalisation was analysed by single year intervals for Aboriginal and non-  
32 Aboriginal children.  
33  
34  
35  
36  
37

38 Poisoning agents were included if they were recorded in any diagnosis field (up to 50 fields). Clinical  
39 outcomes (repeat admissions, length of stay (LOS), procedures) were analysed for all poisoning  
40 admissions. LOS included the total number of hospital days related to the initial admission, and any  
41 subsequent admissions within 75 days. Procedures were classified at the 'block' level according to the  
42 Australian Classification for Health Interventions (ACHI), 8<sup>th</sup> edition.[29]  
43  
44  
45  
46

### 47 **Statistical analysis**

48

49 Differences in poisoning incidence were compared by demographic characteristics using chi squared  
50 tests, stratified by Aboriginality (RQ1). The crude and adjusted odds of poisoning hospitalisation  
51 associated with demographic characteristics were estimated using logistic regression (RQ1). Separate  
52 models were built for Aboriginal and non-Aboriginal children. Fully adjusted models included the  
53 variables sex, socioeconomic disadvantage and remoteness.  
54  
55  
56  
57  
58  
59  
60

1  
2  
3 Amongst children with a poisoning hospitalisation, incidence was examined by year of age (RQ1). The  
4 groups of poisoning agents and the ten most common individual agents were examined across all  
5 poisoning admissions (RQ2). Differences in poisoning agents (both groups and individual agents) by  
6 Aboriginality were tested using chi squared tests (RQ2). The number and types of procedures and LOS  
7 were examined for all poisoning admissions, and compared by Aboriginality, with descriptive statistics  
8 and chi squared tests (RQ3). Data was prepared with SAS Version 9.4 (SAS Institute) and analysed in  
9 Stata Version 14 (StataCorp).  
10  
11  
12  
13

### 14 15 **Ethics Approval**

16  
17 Ethics approval was granted by the New South Wales Population & Health Services Research Committee  
18 (2009/04/141) and the Aboriginal Health and Medical Research Council Committee (684/09).  
19  
20

### 21 **Patient and public involvement**

22  
23 Patients were not directly involved in the development of the research question, outcome measures or  
24 study design. All patient data was de-identified prior to analysis. Results were presented at a public  
25 Aboriginal community health forum in La Perouse, Sydney, Australia, attended by health providers and  
26 community members. Results were also presented at an international injury prevention conference  
27 attended by policymakers and researchers, and to the Board of Kidsafe Australia. A patient information  
28 poster will be developed and presented to Kidsafe Board.  
29  
30  
31  
32  
33  
34  
35  
36  
37  
38  
39  
40  
41  
42  
43  
44  
45  
46  
47  
48  
49  
50  
51  
52  
53  
54  
55  
56  
57  
58  
59  
60

## Results

### Study Population

The cohort included 767,119 children born in NSW between July 1, 2000 and March 31, 2009, of whom 28,528 (3.7%) were Aboriginal (Figure 1). From 2000-2014, there were 3,757 hospital admissions with a primary diagnosis of poisoning. Of these, 321 fell within the 75-day clear zone and were not analysed as new admissions. This left 3,436 poisoning admissions for 3,385 individual children, including 382 (11%) Aboriginal children. Aboriginal children were significantly overrepresented amongst children who had been poisoned ( $\chi^2=543.6$ ,  $p<0.001$ ).

### Demographic Characteristics

Poisoning admission by demographics characteristics for all children in the cohort are shown in Table 1. More Aboriginal than non-Aboriginal children lived in the most disadvantaged areas and in Remote or Very Remote areas. The proportion of children hospitalised for poisoning was higher for boys compared to girls, and increased with increasing socioeconomic disadvantage and increasing remoteness for both Aboriginal and non-Aboriginal children.

Crude and adjusted odds for poisoning hospitalisation for Aboriginal and non-Aboriginal children are shown in Figure 2. Male sex was significantly associated with increased risk of poisoning for both Aboriginal (adjusted odds ratio [aOR] 1.27, 95% CI 1.03-1.56) and non-Aboriginal children (aOR 1.17, 95% CI 1.09-1.26). For non-Aboriginal children, poisoning risk increased with increasing socioeconomic disadvantage and increasing geographic remoteness. For Aboriginal children, increasing socioeconomic disadvantage was also associated with higher poisoning risk, although confidence intervals were wider. However, geographic remoteness was not significantly associated with an increasing poisoning risk.

**Table 1: Poisoning hospitalisations by demographic characteristics, Aboriginal and non-Aboriginal children, New South Wales, 2000-2014**

|                         | Aboriginal children |                    |      | Non-Aboriginal children |                    |        | All children   |                    |        |
|-------------------------|---------------------|--------------------|------|-------------------------|--------------------|--------|----------------|--------------------|--------|
|                         | N (column %)        | N poisoned (row %) | p    | N (column %)            | N poisoned (row %) | p      | N (column %)   | N poisoned (row %) | p      |
| Total (row %)           | 28,528 (100)        | 382 (1.34)         |      | 738,591 (100)           | 3,003 (0.41)       |        | 767,119 (100)  | 3,385 (0.44)       |        |
| Sex                     |                     |                    | 0.03 |                         |                    | <0.001 |                |                    | <0.001 |
| Female                  | 13,472 (47.2)       | 159 (1.18)         |      | 358,899 (48.6)          | 1,342 (0.37)       |        | 372,371 (48.5) | 1,501 (0.40)       |        |
| Male                    | 15,056 (52.8)       | 223 (1.48)         |      | 379,692 (51.4)          | 1,661 (0.44)       |        | 394,748 (51.5) | 1,884 (0.48)       |        |
| Area-level disadvantage |                     |                    | 0.05 |                         |                    | <0.001 |                |                    | <0.001 |
| 1 - Least Disadvantaged | 2,113 (7.4)         | 16 (0.76)          |      | 246,117 (33.3)          | 685 (0.28)         |        | 248,230 (32.4) | 701 (0.28)         |        |
| 2                       | 7,558 (26.5)        | 107 (1.42)         |      | 250,639 (33.9)          | 1,003 (0.40)       |        | 258,197 (33.7) | 1,110 (0.43)       |        |
| 3 - Most disadvantaged  | 18,857 (66.1)       | 259 (1.37)         |      | 241,835 (32.7)          | 1,315 (0.54)       |        | 260,692 (34.0) | 1,574 (0.60)       |        |
| Remoteness              |                     |                    | 0.11 |                         |                    | <0.001 |                |                    | <0.001 |
| Major city              | 9,056 (31.7)        | 105 (1.16)         |      | 492,228 (66.6)          | 1,659 (0.34)       |        | 501,284 (65.3) | 1,764 (0.35)       |        |
| Inner regional          | 10,058 (35.3)       | 132 (1.31)         |      | 182,366 (24.7)          | 880 (0.48)         |        | 192,424 (25.1) | 1,012 (0.53)       |        |
| Outer regional          | 6,852 (24.0)        | 110 (1.61)         |      | 58,709 (7.9)            | 419 (0.71)         |        | 65,561 (8.5)   | 529 (0.81)         |        |
| Remote/Very Remote      | 2,562 (9.0)         | 35 (1.37)          |      | 5,288 (0.7)             | 45 (0.85)          |        | 7,850 (1.0)    | 80 (1.02)          |        |

P-values are from chi-squared tests, testing the null hypothesis that poisoning admissions are distributed equally across the levels of each covariate.

Incidence by one-year age intervals was similar amongst Aboriginal and non-Aboriginal children (Table 2). Poisoning admissions increased from one year, were most frequent between two to three years, and were least frequent at under one year and over four years of age.

**Table 2: Age at poisoning admission, Aboriginal and non-Aboriginal children, New South Wales, 2000-2014**

| <b>Age (years)</b> | <b>Aboriginal children<br/><i>N</i> (column %)</b> | <b>Non-Aboriginal children<br/><i>N</i> (column %)</b> |
|--------------------|----------------------------------------------------|--------------------------------------------------------|
| <1                 | 21 (6)                                             | 220 (7)                                                |
| 1-2                | 96 (25)                                            | 952 (32)                                               |
| 2-3                | 152 (40)                                           | 1211 (40)                                              |
| 3-4                | 73 (19)                                            | 446 (15)                                               |
| 4-5                | 40 (10)                                            | 174 (6)                                                |
| Total              | 382                                                | 3,003                                                  |



## Poisoning agents

Pharmaceutical agents caused most poisonings for both Aboriginal (83%) and non-Aboriginal (81%) children (Table 3).

The most frequent groups of poisoning agents were similar for both Aboriginal and non-Aboriginal children: nonopioid analgesic, antipyretic and antirheumatics (including paracetamol and ibuprofen); antiepileptic, sedative-hypnotic and antiparkinsonism medications; psychotropics; and cardiovascular medications (Table 3). Aboriginal children had a higher proportion of poisoning admissions from cardiovascular medications than non-Aboriginal children (14% and 11%,  $p=0.032$ ), whilst non-Aboriginal children had a higher proportion from nonopioid analgesic, antipyretic and antirheumatics (15% and 8%,  $p<0.001$ ) and autonomic nervous system medications (8% and 5%,  $p=0.048$ ).

The two most frequent individual poisoning agents were benzodiazepines (11%) and 4-aminophenol derivatives (paracetamol) (11%) (Table 3). Together with other antihypertensives not elsewhere classified, they accounted for one in three poisoning admissions. Benzodiazepines and other antihypertensives not elsewhere classified were the two most common individual agents for Aboriginal children and caused a higher proportion of admissions for Aboriginal than non-Aboriginal children (benzodiazepines: 14% and 10%,  $p=0.025$ ; other antihypertensives not elsewhere classified: 10% and 6%,  $p=0.002$ ).

**Table 3: Poisoning agents by class and ten most frequent individual agents, for Aboriginal and Non-Aboriginal children, New South Wales, 2000-2014**

| ICD-10 Diagnosis Code                                                             | Total<br>N (%)  | Aboriginal<br>N (%) | Non-Aboriginal<br>N (%) | p            |
|-----------------------------------------------------------------------------------|-----------------|---------------------|-------------------------|--------------|
| T36-65: All poisoning admissions                                                  | 3,436 (100)     | 391 (11)            | 3,045 (89)              |              |
| T36-50: Pharmaceutical <sup>a</sup>                                               | 2,859 (83)      | 318 (81)            | 2,541 (83)              | 0.291        |
| T51-65: Non-pharmaceutical <sup>a</sup>                                           | 588 (17)        | 76 (19)             | 512 (17)                | 0.195        |
| <b>Pharmaceutical Agents</b>                                                      |                 |                     |                         |              |
| T36-37: Antibiotics, anti-infectives, anti-parasitics <sup>b</sup>                | 47 (1)          | 7 (2)               | 40 (1)                  | 0.445        |
| T38: Hormones and synthetic substitutes                                           | 141 (4)         | 22 (6)              | 119 (4)                 | 0.107        |
| <b>T38.3: Insulin and oral hypoglycemic drugs</b>                                 | <b>96 (3)</b>   | <b>17 (4)</b>       | <b>79 (3)</b>           | <b>0.048</b> |
| T39: Nonopioid analgesics, antipyretics and antirheumatics                        | 493 (14)        | 31 (8)              | 462 (15)                | <0.001       |
| <b>T39.1: 4-aminophenol derivatives</b>                                           | <b>374 (11)</b> | <b>24 (6)</b>       | <b>350 (11)</b>         | <b>0.001</b> |
| T40 Narcotics and hallucinogens                                                   | 178 (5)         | 25 (6)              | 153 (5)                 | 0.25         |
| T41: Poisoning by anaesthetics and therapeutic gases                              | 14 (0)          | 0 (0)               | 14 (0)                  | 0.179        |
| T42: Antiepileptic, sedative-hypnotic and antiparkinsonism                        | 492 (14)        | 66 (17)             | 426 (14)                | 0.125        |
| <b>T42.4: Benzodiazepines</b>                                                     | <b>370 (11)</b> | <b>55 (14)</b>      | <b>315 (10)</b>         | <b>0.025</b> |
| T43: Psychotropic drugs, not elsewhere classified                                 | 394 (11)        | 55 (14)             | 339 (11)                | 0.087        |
| <b>T43.2: Other and unspecified antidepressants</b>                               | <b>149 (4)</b>  | <b>15 (4)</b>       | <b>134 (4)</b>          | <b>0.606</b> |
| T44: Autonomic nervous system drugs                                               | 251 (7)         | 19 (5)              | 232 (8)                 | 0.048        |
| <b>T44.3: Other parasympatholytics and spasmolytics, not elsewhere classified</b> | <b>93 (3)</b>   | <b>7 (2)</b>        | <b>86 (3)</b>           | <b>0.236</b> |
| <b>T44.7: Beta adrenoreceptor antagonists, not elsewhere classified</b>           | <b>105 (3)</b>  | <b>7 (2)</b>        | <b>98 (3)</b>           | <b>0.122</b> |
| T45: Systemic and haematological agents                                           | 286 (8)         | 23 (6)              | 263 (9)                 | 0.063        |
| <b>T45.0: Antiallergic and antiemetic drugs</b>                                   | <b>150 (4)</b>  | <b>14 (4)</b>       | <b>136 (4)</b>          | <b>0.42</b>  |
| <b>T45.4: Iron and its compounds</b>                                              | <b>83 (2)</b>   | <sup>c</sup>        | <sup>c</sup>            |              |
| T46: Cardiovascular system drugs                                                  | 382 (11)        | 56 (14)             | 326 (11)                | 0.032        |
| <b>T46.5: Other antihypertensives, not elsewhere classified</b>                   | <b>211 (6)</b>  | <b>38 (10)</b>      | <b>173 (6)</b>          | <b>0.002</b> |
| T47: Gastrointestinal system drugs                                                | 80 (2)          | 8 (2)               | 72 (2)                  | 0.694        |
| T48: Smooth and skeletal muscle and respiratory system agents                     | 98 (3)          | 6 (2)               | 92 (3)                  | 0.096        |
| T49: Topical agents and ophthalmological, otorhinolaryngological and dental drugs | 143 (4)         | 12 (3)              | 131 (4)                 | 0.25         |

|                                                                                       |               |               |               |              |
|---------------------------------------------------------------------------------------|---------------|---------------|---------------|--------------|
| T50: Diuretics and other and unspecified drugs, medicaments and biological substances | 207 (6)       | 22 (6)        | 185 (6)       | 0.725        |
| <b>T50.9: Other and unspecified drugs, medicaments and biologicals</b>                | <b>94 (3)</b> | <b>10 (3)</b> | <b>84 (3)</b> | <b>0.819</b> |
| <b>Non-pharmaceutical agents</b>                                                      |               |               |               |              |
| T51: Toxic effect of alcohol                                                          | 35 (1)        | 5 (1)         | 30 (1)        | 0.586        |
| T52: Toxic effect of organic solvents                                                 | 185 (5)       | 22 (6)        | 163 (5)       | 0.822        |
| T53: Toxic effect of halogen derivatives of aliphatic and aromatic hydrocarbons       | 10 (0)        | 0 (0)         | 10 (0)        | 0.256        |
| T54-55: Toxic effect of corrosive substances, soaps and detergents <sup>b</sup>       | 132 (4)       | 17 (4)        | 115 (4)       | 0.58         |
| T57: Toxic effect of other inorganic substances                                       | 0 (0)         | 0 (0)         | 0 (0)         |              |
| T60: Toxic effect of pesticides                                                       | 106 (3)       | 12 (3)        | 94 (3)        | 0.985        |
| T65: Toxic effect of other and unspecified substances                                 | 124 (4)       | 21 (5)        | 103 (3)       | 0.047        |

<sup>a</sup> May exceed total number of poisoning admissions due to multiple agents per admission

<sup>b</sup> Categories combined due to small cell numbers

<sup>c</sup> Suppressed due to small cell numbers

## Clinical outcomes

Aboriginal and non-Aboriginal children had similar clinical outcomes in terms of repeat admissions, LOS and procedures (Table 4). There was one death from poisoning during the study period.

### *Repeat admissions*

There were 51 repeat admissions (1% of poisoning admissions). Of these, 42 were non-Aboriginal and 9 were Aboriginal. Due to small numbers, no further analysis of this group was undertaken.

### *Length of stay*

Most children (91%) hospitalised for poisoning had a short LOS of  $\leq 1$  day. Excluding one outlier, LOS ranged from  $<1$  to 18 days. The distribution of LOS was similar for Aboriginal and non-Aboriginal children (Table 4,  $\chi^2=3.4147$ ,  $p=0.332$ ).

**Table 4: Clinical outcomes of Aboriginal and non-Aboriginal children with a poisoning hospitalisation, New South Wales, 2000-2014**

|                                                                | Aboriginal N (%) | Non-Aboriginal N (%) | Total N (%) |
|----------------------------------------------------------------|------------------|----------------------|-------------|
| Total number of poisoning admissions                           | 391 (100)        | 3,045 (100)          | 3,436 (100) |
| Repeat admissions                                              | 9 (2)            | 42 (1)               | 51 (1)      |
| Length of stay (days)                                          |                  |                      |             |
| <1                                                             | 125 (32)         | 1,085 (36)           | 1,210 (35)  |
| 1                                                              | 225 (58)         | 1,707 (56)           | 1,932 (56)  |
| 2                                                              | 25 (6)           | 158 (5)              | 183 (5)     |
| 3+                                                             | 16 (4)           | 95 (3)               | 111 (3)     |
| Total number of procedures                                     | 39 (10)          | 335 (11)             | 374 (11)    |
| Allied health interventions                                    | 27 (7)           | 233 (8)              | 260 (8)     |
| Airway and ventilation                                         | 5 (1)            | 32 (1)               | 37 (1)      |
| Other (including diagnostics and pharmacotherapy) <sup>a</sup> | 7 (2)            | 70 (2)               | 77 (2)      |

<sup>a</sup>Combined due to small cell numbers

### *Procedures*

Most children hospitalised for poisoning had no recorded procedures (89%, 3,062/3,436) and this proportion was similar for Aboriginal and non-Aboriginal children. Of the 374 hospital admissions with a recorded procedure, the majority were allied health interventions, mostly a social worker consultation (8% of poisoning admissions).

## Sensitivity Analyses

1  
2  
3 Compared with the ever-identified method, defining Aboriginal status by most recent record and birth  
4 record reduced the numbers of children in the cohort to 25,891 and 21,576 respectively, and the number  
5 of children poisoned to 319 and 246 respectively (Supplement 1, Table 1). Other findings remained  
6 similar (Supplement 1, Tables 2-5). For example, the magnitude of the association between poisoning  
7 admission and sex, area-level disadvantage and remoteness were similar with overlapping confidence  
8 intervals. The profile of age at admission, common poisoning agents and clinical outcomes were also  
9 consistent across all three identification methods.  
10  
11  
12  
13  
14  
15  
16  
17  
18  
19  
20  
21  
22  
23  
24  
25  
26  
27  
28  
29  
30  
31  
32  
33  
34  
35  
36  
37  
38  
39  
40  
41  
42  
43  
44  
45  
46  
47  
48  
49  
50  
51  
52  
53  
54  
55  
56  
57  
58  
59  
60

## Discussion

Compared with non-Aboriginal children, preschool Aboriginal children in NSW have about three times the rate of hospitalised poisoning, but similar patterns of poisoning risk across available demographic factors, poisoning agents and clinical outcomes.

Amongst both Aboriginal and non-Aboriginal children, the incidence of hospitalised poisoning increased from age one, peaked at two to three years, and declined by four years, consistent with previous studies.[3, 5-8, 11] Male sex was a significant risk factor for both Aboriginal and non-Aboriginal children, consistent with findings from the general population [2, 3, 7, 16] and amongst Aboriginal children in NSW.[11, 21] Higher poisoning rates amongst boys may be due to earlier development of motor skills than risk perception.[5]

Poisoning risk increased with socioeconomic disadvantage amongst Aboriginal and non-Aboriginal children, and increased with geographic remoteness amongst non-Aboriginal children. Socioeconomic disadvantage is a well-established risk factor for unintentional injury [14, 30] and children from low-income backgrounds have a higher poisoning risk [13, 14, 31] due to more co-morbidities and medication usage, less access to childcare and storage equipment, and overcrowding.[31]

Geographic remoteness was associated with significantly increased poisoning risk amongst non-Aboriginal children. In contrast, no significant trend between poisoning and geographic remoteness was evident amongst Aboriginal children, possibly reflecting small subgroup sizes and wider confidence intervals. This may also reflect additional barriers in access to health services, or differences in housing, medication availability, or other social factors experienced by Aboriginal people in remote areas.

Broadly, higher poisoning hospitalisations in remote areas may suggest more children are being poisoned, but also that children presenting to rural hospitals are more likely to be admitted [4, 16] for reasons including distance from facilities, limited specialist services and delayed diagnostic tests.[23, 32] Differences in poisoning agents by geographic region may also contribute. Some have suggested children in rural areas are more likely to be poisoned by chemical such as pesticides. However, evidence is conflicting, with this hypothesis supported by a Queensland study [2] but not a subsequent NSW study which did not find higher rates of chemical poisoning in rural areas.[10]

Several reasons may contribute to the disparity in hospitalised poisoning between Aboriginal and non-Aboriginal children. Aboriginal people experience a higher burden of socioeconomic disadvantage and chronic disease, potentially exposing children to more medications. Overcrowding and poor housing disproportionately affects Aboriginal people and contributes to stress, poor supervision and health

1  
2  
3 problems.[33] Higher levels of mobility amongst Aboriginal people [33] may expose children to  
4 medications belonging to different people in their own or other people's homes.

6  
7 Pharmaceuticals, including adult and paediatric over-the-counter and prescription medications, are the  
8 leading causes of hospitalised unintentional poisonings amongst both Aboriginal and non-Aboriginal  
9 children. The most frequent groups of poisoning agents identified in this study—analgesic; psychotropic,  
10 antiepileptic, and sedative; and cardiovascular agents—are commonly prescribed medications in  
11 Australia. Of these, the most frequent individual agents benzodiazepines, 4-aminophenol derivatives  
12 (paracetamol) and other antihypertensives not elsewhere classified (for example clonidine) accounted for  
13 almost one-third of all poisoning admissions.

15  
16  
17  
18  
19 Chronic diseases are highly prevalent, affecting 11 million Australians. In 2014-15, 117 million  
20 medications were prescribed by a GP, a 17% increase since 2010-11.[34] This rising medication use in  
21 Australia could be contributing towards unintentional childhood poisonings, as has been demonstrated in  
22 the United States, where pharmaceutical poisonings in children have been associated with trends in adult  
23 medication prescriptions.[35]

25  
26  
27 Benzodiazepines were the most common poisoning agent for Aboriginal children, similar to a previous  
28 report amongst Aboriginal and non-Aboriginal people in NSW.[22] Benzodiazepines are widely  
29 prescribed in Australia, often for anxiety and insomnia. Aboriginal people experience a higher burden of  
30 mental health issues [36] and higher rates of benzodiazepine poisoning amongst Aboriginal children may  
31 reflect higher adult usage, although we cannot confirm this using the available data.

33  
34  
35  
36 Antihypertensives not elsewhere classified were the second most frequent poisoning agent for Aboriginal  
37 children in our study. In Australia, this largely includes clonidine, which is used for child behavioural  
38 disorders.[37] Aboriginal children, particularly those from disadvantaged backgrounds, have a higher risk  
39 of emotional or behavioural difficulties.[38, 39] Childhood clonidine poisoning has been found in other  
40 research to be often caused by a child accidentally ingesting clonidine belonging to another child such as  
41 an older sibling.[40]

43  
44  
45  
46 Most children hospitalised for poisoning had a short LOS of  $\leq 1$  day and few required procedures,  
47 consistent with previous reports.[3, 23, 32] Allied health interventions were the most common procedure,  
48 yet fewer than one in ten poisoning hospitalisations had a recorded social worker consultation. Social  
49 workers can support parents during a stressful hospitalisation, and provide injury prevention education  
50 when they are more likely to be receptive.[41] Low utilisation of this resource presents a lost opportunity  
51 for safety promotion. However, cultural sensitivity is required to promote safety and not instigate blame  
52 or fear, given the intergenerational trauma around child removal for Aboriginal families.[42]

## Strengths and Limitations

This study's strengths include its focus on preschool-aged children, whole-of-population design and minimal recall bias using routinely collected administrative data. However, covariates were limited, and risk factors previously demonstrated to affect poisoning risk were unavailable, such as perinatal depression [13, 14], younger maternal age [8], parental alcohol misuse [8, 13], poor storage and supervision [21], household dwelling and socioeconomic deprivation [13, 14]. Clinical information (such as time to presentation, symptoms, laboratory results, treatment, complications [7]) were also unavailable. The use of an area-level index for socioeconomic status may introduce ecological bias. For example, individuals from low socioeconomic households who live in relatively advantaged areas will be misclassified.

The under-identification of Aboriginal children in Australian public hospital data can affect estimates of health outcomes.[25] This study used an 'ever-identified' algorithm for children recorded at least once as Aboriginal in order to maximise the number of poisoning events in Aboriginal children for analysis. Although this method may introduce bias in comparison of event rates between Aboriginal and non-Aboriginal people due to differential increase in identification among sicker individuals with more hospital records, such comparisons were not the main purpose of our study. Also, results of the sensitivity analysis indicated that the methods of identification did not alter the main conclusions (Supplement 1).

Hospital admissions represent only a fraction of poisonings. Our study does not reflect the complete spectrum of early childhood poisoning incidents, but captures the most severe hospitalised cases with the largest impact on children and health services.

Finally, our analysis of poisoning agents was limited to the ICD-10 taxonomy. In some circumstances it was not possible to determine specific agents, for example, 'other' categories.

## Implications for practice and prevention

Reducing the poisoning rate among Aboriginal children requires combined strategies of household storage interventions, accessible poisons information centres, and enforcement of packaging legislation. [43] No known injury prevention programs have specifically addressed unintentional poisoning in Aboriginal communities [44], however, safe storage of medications is known to be key to childhood poisoning prevention.[15] Aboriginal families and low-income families may face barriers in promoting safe storage due to costs of safety equipment and prohibitions on home installations in public housing or rental properties.[45, 46] Providing low cost or free equipment can improve household storage practices, particularly with education and fitting assistance.[47] The 'Safe Homes Safe Kids' program provided



1  
2  
3 home safety education and devices to Aboriginal families in the Illawarra region of NSW.[47] Future  
4 research involving community consultation is needed to address poisoning prevention in Aboriginal  
5 communities, considering factors such as poverty, trauma, housing, and family separation.[48]  
6  
7  
8  
9  
10  
11  
12  
13  
14  
15  
16  
17  
18  
19  
20  
21  
22  
23  
24  
25  
26  
27  
28  
29  
30  
31  
32  
33  
34  
35  
36  
37  
38  
39  
40  
41  
42  
43  
44  
45  
46  
47  
48  
49  
50  
51  
52  
53  
54  
55  
56  
57  
58  
59  
60

For peer review only

## Conclusion

Unintentional poisoning is most prevalent amongst preschool-aged children, and disproportionately affects Aboriginal children. This study confirmed the inequity in hospitalised poisonings between Aboriginal and non-Aboriginal children, and demonstrated that adult and child medications commonly used in the general population contribute to poisonings amongst both groups. With a rising prevalence of chronic disease and increases in prescription medication use amongst both Aboriginal people and the wider community, keeping children safe from unintentional poisoning should be a priority. Further research and policy development is needed to investigate culturally safe prevention strategies that include improved packaging, safe storage and education.

## Funding

This work was supported by the Australian National Health and Medical Research Council (573113).

## Contributions

CL, SW, LJ, and MH contributed to the conception and design of the study, including the research questions and the analysis. CL wrote each drafts, and together with MH, produced the tables and figures. LJ, SW and MH provided technical support and supervision throughout the study. All authors contributed to the drafting of the work, approval of the final manuscript, and critical interpretation of its findings, with particular contributions from KZ, SW and NL regarding the translation of findings with other stakeholders for prevention.

## Acknowledgements

The authors wish to thank Dr Holger Moller who prepared the dataset prior to the study period; this study builds upon knowledge generated by his previous research. The authors also wish to thank Professor Nicholas Buckley, Dr Jane Bell, Dr Ruth Barker and Professor Sallie Pearson for their assistance in the interpretation of poisoning agents; and Professor Rebecca Ivers, Professor Kathleen Clapham, and Dr Kathleen Falster for consultation about translating the research findings for policy and practice.

## Competing Interests

None declared

## Funding

Australian National Health and Medical Research Council (573113)

**Data sharing statement:** no additional data are available.

1  
2  
3 **Figure 1:** Indigenous Health Outcomes Patient Evaluation (IHOPE) data sources and study cohort  
4 selection  
5

6  
7 **Figure 2:** Crude and adjusted odds ratios with 95% confidence intervals for poisoning hospitalisation, by  
8 demographic factors, Aboriginal and non-Aboriginal children, New South Wales, 2000-2014. Legend:  
9 OR: odds ratio, aOR: adjusted odds ratio, CI: confidence interval. Fully adjusted models included  
10 variables sex, area-level disadvantage, and geographic remoteness  
11  
12  
13  
14  
15  
16  
17  
18  
19  
20  
21  
22  
23  
24  
25  
26  
27  
28  
29  
30  
31  
32  
33  
34  
35  
36  
37  
38  
39  
40  
41  
42  
43  
44  
45  
46  
47  
48  
49  
50  
51  
52  
53  
54  
55  
56  
57  
58  
59  
60

## References

1. World Health Organization. World report on child injury prevention. Switzerland: World Health Organization; 2008. Report No.: 9241563575.
2. Reith D, Pitt W, Hockey R. Childhood poisoning in Queensland: an analysis of presentation and admission rates. *Journal of paediatrics and child health*. 2001;37(5):446-50.
3. Cripps R, Steel D. Childhood poisoning in Australia. South Australia: AIHW National Injury Surveillance Unit, Flinders University; 2006.
4. Tovell A, McKenna K, Bradley C, Pointer S. Hospital separations due to injury and poisoning, Australia 2009-10. Canberra: Australian Institute of Health and Welfare; 2012. Report No.: Cat. no. INJCAT 145.
5. Schmertmann M, Williamson A, Black D. Stable age pattern supports role of development in unintentional childhood poisoning. *Injury Prevention*. 2008;14(1):30-3.
6. Agran PF, Anderson C, Winn D, Trent R, Walton-Haynes L, Thayer S. Rates of pediatric injuries by 3-month intervals for children 0 to 3 years of age. *Pediatrics*. 2003;111(6 Pt 1):e683-92.
7. Hoy J, Day L, Tibballs J, Ozanne-Smith J. Unintentional poisoning hospitalisations among young children in Victoria. *Injury Prevention*. 1999;5(1):31-5.
8. Tyrrell EG, Orton E, Tata LJ, Kendrick D. Children at risk of medicinal and non-medicinal poisoning: a population-based case-control study in general practice. *British Journal of General Practice*. 2012;62(605):e827-33.
9. Rodgers GB, Franklin RL, Midgett JD. Unintentional paediatric ingestion poisonings and the role of imitative behaviour. *Injury Prevention*. 2012;18(2):103.
10. Lam LT. Childhood and adolescence poisoning in NSW, Australia: an analysis of age, sex, geographic, and poison types. *Injury Prevention*. 2003;9(4):338-42.
11. Moller H, Falster K, Ivers R, Falster MO, Clapham K, Jorm L. Closing the Aboriginal child injury gap: targets for injury prevention. *Australian and New Zealand Journal of Public Health*. 2017;41(1):8-14.
12. Australian Institute of Health and Welfare (AIHW): Pointer S. Hospitalised injuries in Aboriginal and Torres Strait Islander children and young people 2011-13. Canberra: AIHW; 2016. Report No.: Cat no. INJCAT 172.
13. Orton E, Kendrick D, West J, Tata LJ. Independent risk factors for injury in pre-school children: three population-based nested case-control studies using routine primary care data. *PloS one*. 2012;7(4):e35193.
14. Laursen B, Nielsen JW. Influence of sociodemographic factors on the risk of unintentional childhood home injuries. *European journal of public health*. 2008;18(4):366-70.

15. Kendrick D, Majsak-Newman G, Benford P, Coupland C, Timblin C, Hayes M, et al. Poison prevention practices and medically attended poisoning in young children: multicentre case-control study. *Injury Prevention*. 2017;23(2):93.
16. O'Connor P. Differentials in poisoning rates of young Australian children according to residential location and geographical remoteness. *Injury Prevention*. 2005;11(4):204-6.
17. Moller H, Falster K, Ivers R, Jorm L. Inequalities in unintentional injuries between indigenous and non-indigenous children: a systematic review. *Injury Prevention*. 2015;21(e1):e144-52.
18. Moller H, Falster K, Ivers R, Falster M, Randall D, Clapham K, et al. Inequalities in Hospitalized Unintentional Injury Between Aboriginal and Non-Aboriginal Children in New South Wales, Australia. *American Journal of Public Health*. 2016;106(5):899-905.
19. Alaghebandan R, Sikdar KC, MacDonald D, Collins KD, Rossignol AM. Unintentional injuries among children and adolescents in Aboriginal and non-Aboriginal communities, Newfoundland and Labrador, Canada. *International Journal of Circumpolar Health*. 2010;69(1):61-71.
20. Johnson SI, Sullivan M, Grossman DC. Hospitalizations for injury among American Indian youth in Washington. *Western Journal of Medicine*. 1999;171(1):10-4.
21. Schmetzmann M, Williamson A, Black D, Wilson L. Risk factors for unintentional poisoning in children aged 1-3 years in NSW Australia: a case-control study. *BMC pediatrics*. 2013;13:88.
22. Walter S. Mortality and hospitalisation due to injury in the Aboriginal population of New South Wales. North Sydney, Australia: New South Wales Department of Health. 2010.
23. Cheng DR, Ip CCK. Unintentional paediatric poisoning in rural Victoria: Incidence and admission rates. *Australian journal of rural health*. 2012;20(6):339-43.
24. Australian Bureau of Statistics. Estimates of Aboriginal and Torres Strait Islander Australians, June 2011. [updated 27 January 2016. Available from: <http://www.abs.gov.au/ausstats/abs@.nsf/mf/3238.0.55.001>.
25. Gialamas A, Pilkington R, Berry J, Scalzi D, Gibson O, Brown A, et al. Identification of Aboriginal children using linked administrative data: Consequences for measuring inequalities. *Journal of paediatrics and child health*. 2016;52(5):534-40.
26. Lestina DC, Miller TR, Smith GS. Creating injury episodes using medical claims data. *Journal of Trauma and Acute Care Surgery*. 1998;45(3):565-9.
27. Australian Bureau of Statistics. Socio-Economic Indexes for Areas. [updated September 2013. Available from: <http://www.abs.gov.au/websitedbs/censushome.nsf/home/seifas>.
28. Australian Bureau of Statistics. Remoteness Structure. [Available from: <http://www.abs.gov.au/websitedbs/D3310114.nsf/home/remoteness+structure>.

- 1  
2  
3 29. Australian Institute of Health and Welfare. Australian Classification of Health Interventions  
4 (ACHI) 8th edition. [Available from: <http://meteor.aihw.gov.au/content/index.phtml/itemId/514008>.  
5
- 6 30. Birken CS, MacArthur C. Socioeconomic status and injury risk in children. *Paediatrics & Child*  
7 *Health*. 2004;9(5):323-5.  
8
- 9 31. Groom L, Kendrick D, Coupland C, Patel B, Hippisley-Cox J. Inequalities in hospital admission  
10 rates for unintentional poisoning in young children. *Injury Prevention*. 2006;12(3):166-70.  
11
- 12 32. Sherrard J, Sweidan M, Robinson J, Killian J, Brennan C, Ozanne-Smith J. Barriers to child  
13 poisoning prevention: Why does child resistant packaging fail? Melbourne: Monash University Accident  
14 Research Centre; 2005.  
15
- 16 33. Bailie RS, Wayte KJ. Housing and health in Indigenous communities: Key issues for housing and  
17 health improvement in remote Aboriginal and Torres Strait Islander communities. *Australian Journal of*  
18 *Rural Health*. 2006;14(5):178-83.  
19
- 20 34. Australian Institute of Health and Welfare (AIHW). Australia's health 2016. Canberra: AIHW;  
21 2016. Australia's health series no. 15. Cat no. AUS 199.  
22
- 23 35. Burghardt LC, Ayers JW, Brownstein JS, Bronstein AC, Ewald MB, Bourgeois FT. Adult  
24 prescription drug use and pediatric medication exposures and poisonings. *Pediatrics*. 2013;132(1):18-27.  
25
- 26 36. Jorm AF, Bouchier SJ, Cvetkovski S, Stewart G. Mental health of Indigenous Australians: a  
27 review of findings from community surveys. *Medical Journal of Australia*. 2012;196(2):118.  
28
- 29 37. Australian Medicines Handbook Adelaide: Australian Medicines Handbook Pty Ltd; 2017.  
30 [Available from: <https://amhonline.amh.net.au/>.  
31
- 32 38. Zubrick S, Lawrence D, Silburn S, Blair E, Milroy H, Wilkes E, et al. The Western Australian  
33 Aboriginal child health survey: The health of Aboriginal children and young people: Telethon Institute for  
34 Child Health Research; 2004.  
35
- 36 39. Shepherd CCJ, Li J, Mitrou F, Zubrick SR. Socioeconomic disparities in the mental health of  
37 Indigenous children in Western Australia. *BMC Public Health*. 2012;12:756-  
38
- 39 40. Sinha Y, Cranswick NE. Clonidine poisoning in children: a recent experience. *Journal of*  
40 *paediatrics and child health*. 2004;40(12):678-80.  
41
- 42 41. Zonfrillo MR, Melzer-Lange M, Gittelman MA. A comprehensive approach to pediatric injury  
43 prevention in the emergency department. *Pediatric emergency care*. 2014;30(1):56-62.  
44
- 45 42. Bennett B, Zubrzycki J, Bacon V. What Do We Know? The Experiences of Social Workers  
46 Working Alongside Aboriginal People. *Australian Social Work*. 2011;64(1):20-37.  
47
- 48 43. Adams S, Elkington J, MacKay JM, K Z, O'Sullivan M, Vincenten K, et al. Child Safety Good  
49 Practice Guide: good investments in unintentional child injury prevention and safety promotion. Sydney:  
50 Sydney Children's Hospitals Network; 2016.  
51  
52  
53  
54  
55  
56  
57  
58  
59  
60

- 1  
2  
3 44. Senserrick T, Hinchcliff R, Ivers R, Boufous S, Martiniuk A, Clapham K. Aboriginal Injury  
4 Prevention Projects: A Rapid Review. Ultimo, Australia: Sax Institute for NSW Health and the George  
5 Institute. 2010.  
6  
7  
8 45. Smithson J, Garside R, Pearson M. Barriers to, and facilitators of, the prevention of unintentional  
9 injury in children in the home: a systematic review and synthesis of qualitative research. *Injury*  
10 *Prevention*. 2011;17(2):119-26.  
11  
12 46. Gibbs L, Waters E, Sherrard J, Ozanne-Smith J, Robinson J, Young S, et al. Understanding  
13 parental motivators and barriers to uptake of child poison safety strategies: a qualitative study. *Injury*  
14 *Prevention*. 2005;11(6):373-7.  
15  
16 47. Achana FA, Sutton AJ, Kendrick D, Wynn P, Young B, Jones DR, et al. The Effectiveness of  
17 Different Interventions to Promote Poison Prevention Behaviours in Households with Children: A  
18 Network Meta-Analysis. *PloS one*. 2015;10(4):e0121122.  
19  
20 48. Ivers R, Clapham K, Senserrick T, Lyford M, Stevenson M. Injury prevention in Australian  
21 Indigenous communities. *Injury*. 2008;39(Supplement 5):S61-S7.  
22  
23  
24  
25  
26  
27  
28  
29  
30  
31  
32  
33  
34  
35  
36  
37  
38  
39  
40  
41  
42  
43  
44  
45  
46  
47  
48  
49  
50  
51  
52  
53  
54  
55  
56  
57  
58  
59  
60





Figure 1: Indigenous Health Outcomes Patient Evaluation (IHOPE) data sources and study cohort selection

190x254mm (300 x 300 DPI)

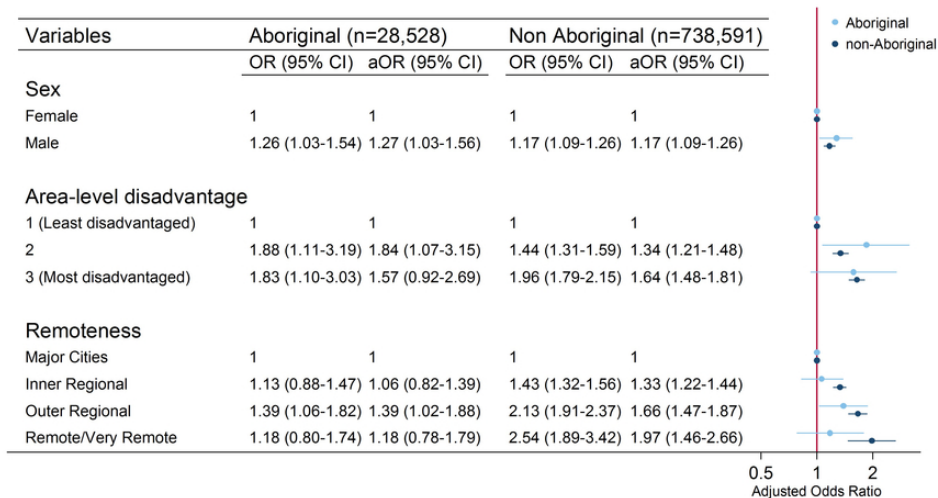

Figure 2: Crude and adjusted odds ratios with 95% confidence intervals for poisoning hospitalisation, by demographic factors, Aboriginal and non-Aboriginal children, New South Wales, 2000-2014. Legend: OR: odds ratio, aOR: adjusted odds ratio, CI: confidence interval. Fully adjusted models included variables sex, area-level disadvantage, and geographic remoteness

38x21mm (600 x 600 DPI)

## **Supplement 1: Comparison of results by Aboriginal identification method**

### **List of content:**

**Supplementary Table 1:** Number of Aboriginal children, by identification method

**Supplementary Table 2:** Adjusted odds ratio of poisoning admission by demographic characteristics, Aboriginal and non-Aboriginal children, by identification method (Answers RQ1)

**Supplementary Table 3:** Age at admission, Aboriginal children, by identification method (Answers RQ1)

**Supplementary Table 4:** Poisoning agents, Aboriginal children, by identification method (Answers RQ2)

**Supplementary Table 5:** Clinical outcomes, Aboriginal children, by identification method (Answers RQ3)

### **Research Questions (RQ):**

- 1) Are the demographic risk factors for poisoning (sex, socioeconomic status and geographic remoteness) similar for both Aboriginal and non-Aboriginal children?
- 2) Which agents most frequently result in poisoning hospitalisation and are they different for Aboriginal and non-Aboriginal children?
- 3) Are the clinical outcomes from hospitalised poisoning similar for Aboriginal and non-Aboriginal children?

1  
2  
3  
4  
5  
6  
7  
8  
9  
10  
11  
12  
13  
14  
15  
16  
17  
18  
19  
20  
21  
22  
23  
24  
25  
26  
27  
28  
29  
30  
31  
32  
33  
34  
35  
36  
37  
38  
39  
40  
41  
42  
43  
44  
45  
46  
47

**Supplementary Table 1: Number of Aboriginal children, by identification method**

| Identification method        | Number of Aboriginal children identified |                           |
|------------------------------|------------------------------------------|---------------------------|
|                              | Cohort                                   | Poisoned (% total cohort) |
| Ever identified <sup>a</sup> | 28,528                                   | 382 (1.34)                |
| Most recent <sup>b</sup>     | 25,891                                   | 319 (1.23)                |
| Birth record <sup>c</sup>    | 21,576                                   | 246 (1.14)                |

<sup>a</sup> Child identified as Aboriginal in any APDC record between their birth and fifth birthday  
<sup>b</sup> Child identified as Aboriginal in the most recent APDC record between their birth and fifth birthday  
<sup>c</sup> Child identified as Aboriginal in their APDC birth record

**Supplementary Table 2: Adjusted odds ratio of poisoning admission by demographic characteristics, Aboriginal and non-Aboriginal children, by identification method**

| Variables                        | Non-Aboriginal children<br>(n=738,591) | Aboriginal children                        |                                        |                                         |
|----------------------------------|----------------------------------------|--------------------------------------------|----------------------------------------|-----------------------------------------|
|                                  |                                        | Ever-identified <sup>c</sup><br>(n=28,528) | Most recent <sup>d</sup><br>(n=25,891) | Birth record <sup>e</sup><br>(n=21,576) |
| Logistic regression <sup>a</sup> | aOR <sup>b</sup> (95% CI)              | aOR (95% CI)                               | aOR (95% CI)                           | aOR (95% CI)                            |
| Sex                              |                                        |                                            |                                        |                                         |
| Female                           | 1                                      | 1                                          | 1                                      | 1                                       |
| Male                             | 1.17 (1.09-1.26)                       | 1.27 (1.03-1.56)                           | 1.34 (1.07-1.67)                       | 1.44 (1.12-1.87)                        |
| Area-level disadvantage          |                                        |                                            |                                        |                                         |
| 1 (Least disadvantaged)          | 1                                      | 1                                          | 1                                      | 1                                       |
| 2                                | 1.34 (1.21-1.48)                       | 1.84 (1.07-3.15)                           | 1.95 (1.00-3.82)                       | 1.90 (0.89-4.05)                        |
| 3 (Most disadvantaged)           | 1.64 (1.48-1.81)                       | 1.57 (0.92-2.69)                           | 1.71 (0.88-3.34)                       | 2.02 (0.96-4.27)                        |
| Remoteness                       |                                        |                                            |                                        |                                         |
| Major cities                     | 1                                      | 1                                          | 1                                      | 1                                       |
| Inner regional                   | 1.33 (1.22-1.44)                       | 1.06 (0.82-1.39)                           | 1.32 (0.97-1.79)                       | 1.01 (0.72-1.41)                        |
| Outer regional                   | 1.66 (1.47-1.87)                       | 1.39 (1.02-1.88)                           | 1.65 (1.17-2.34)                       | 1.10 (0.75-1.62)                        |
| Remote/Very remote               | 1.97 (1.46-2.66)                       | 1.18 (0.78-1.79)                           | 1.38 (0.87-2.17)                       | 1.10 (0.68-1.77)                        |

<sup>a</sup> Full model included all demographic variables (sex, disadvantage, remoteness)

<sup>b</sup> aOR: adjusted odds ratio

<sup>c</sup> Child identified as Aboriginal in any APDC record between their birth and fifth birthday

<sup>d</sup> Child identified as Aboriginal in the most recent APDC record between their birth and fifth birthday

<sup>e</sup> Child identified as Aboriginal in their APDC birth record

1  
2  
3  
4  
5  
6  
7  
8  
9  
10  
11  
12  
13  
14  
15  
16  
17  
18  
19  
20  
21  
22  
23  
24  
25  
26  
27  
28  
29  
30  
31  
32  
33  
34  
35  
36  
37  
38  
39  
40  
41  
42  
43  
44  
45  
46  
47

**Supplementary Table 3: Age at admission, Aboriginal children, by identification method**

| Age (years)                       | Total<br><i>N</i> (column %) | Aboriginal children                                 |                                                 |                                                  |
|-----------------------------------|------------------------------|-----------------------------------------------------|-------------------------------------------------|--------------------------------------------------|
|                                   |                              | Ever-identified <sup>a</sup><br><i>N</i> (column %) | Most recent <sup>b</sup><br><i>N</i> (column %) | Birth record <sup>c</sup><br><i>N</i> (column %) |
| <1                                | 241 (7)                      | 21 (6)                                              | 18 (6)                                          | 13 (5)                                           |
| 1-2                               | 1048 (31)                    | 96 (25)                                             | 80 (25)                                         | 62 (25)                                          |
| 2-3                               | 1363 (40)                    | 152 (40)                                            | 127 (40)                                        | 95 (39)                                          |
| 3-4                               | 519 (15)                     | 73 (19)                                             | 59 (19)                                         | 46 (19)                                          |
| 4-5                               | 214 (6)                      | 40 (10)                                             | 35 (11)                                         | 30 (12)                                          |
| Total number of children poisoned | 3385 (100)                   | 382 (100)                                           | 319 (100)                                       | 246 (100)                                        |

<sup>a</sup>Child identified as Aboriginal in any APDC record between their birth and fifth birthday  
<sup>b</sup>Child identified as Aboriginal in the most recent APDC record between their birth and fifth birthday  
<sup>c</sup>Child identified as Aboriginal in their APDC birth record

**Supplementary Table 4: Poisoning agents, Aboriginal children, by identification method**

| ICD-10 Diagnosis Code                                                                 | Aboriginal children N (%) |                              |                          |                           |
|---------------------------------------------------------------------------------------|---------------------------|------------------------------|--------------------------|---------------------------|
|                                                                                       | Total N (%)               | Ever-identified <sup>a</sup> | Most recent <sup>b</sup> | Birth record <sup>c</sup> |
| T36-65: All poisoning admissions                                                      | 3,436 (100)               | 391 (11)                     | 327 (10)                 | 251 (7)                   |
| T36-50: Pharmaceutical <sup>d</sup>                                                   | 2,859 (83)                | 318 (81)                     | 261 (80)                 | 207 (82)                  |
| T51-65: Non-pharmaceutical <sup>d</sup>                                               | 588 (17)                  | 76 (19)                      | 69 (21)                  | 46 (18)                   |
| <i>Pharmaceutical Agents</i>                                                          |                           |                              |                          |                           |
| T36-37: Antibiotics, anti-infectives, anti-parasitics <sup>e</sup>                    | 47 (1)                    | 7 (2)                        | 4 (1)                    | 6 (2)                     |
| T38: Hormones and synthetic substitutes                                               | 141 (4)                   | 22 (6)                       | 18 (6)                   | 14 (7)                    |
| <b>T38.3: Insulin and oral hypoglycemic drugs</b>                                     | <b>96 (3)</b>             | <b>17 (4)</b>                | <b>15 (5)</b>            | <b>11 (4)</b>             |
| T39: Nonopioid analgesics, antipyretics and antirheumatics                            | 493 (14)                  | 31 (8)                       | 23 (7)                   | 18 (7)                    |
| <b>T39.1: 4-aminophenol derivatives</b>                                               | <b>374 (11)</b>           | <b>24 (6)</b>                | <b>19 (6)</b>            | <b>16 (6)</b>             |
| T40 Narcotics and hallucinogens                                                       | 178 (5)                   | 25 (6)                       | 20 (6)                   | 19 (8)                    |
| T41: Poisoning by anaesthetics and therapeutic gases                                  | 14 (0)                    | 0 (0)                        | 0 (0)                    | 0 (0)                     |
| T42: Antiepileptic, sedative-hypnotic and antiparkinsonism                            | 492 (14)                  | 66 (17)                      | 57 (17)                  | 46 (18)                   |
| <b>T42.4: Benzodiazepines</b>                                                         | <b>370 (11)</b>           | <b>55 (14)</b>               | <b>48 (15)</b>           | <b>38 (15)</b>            |
| T43: Psychotropic drugs, not elsewhere classified                                     | 394 (11)                  | 55 (14)                      | 47 (14)                  | 36 (14)                   |
| <b>T43.2: Other and unspecified antidepressants</b>                                   | <b>149 (4)</b>            | <b>15 (4)</b>                | <b>11 (3)</b>            | <b>9 (4)</b>              |
| T44: Autonomic nervous system drugs                                                   | 251 (7)                   | 19 (5)                       | 12 (4)                   | 12 (5)                    |
| <b>T44.3: Other parasympatholytics and spasmolytics, not elsewhere classified</b>     | <b>93 (3)</b>             | <b>7 (2)</b>                 | <b>5 (2)</b>             | <b>5 (2)</b>              |
| <b>T44.7: Beta adrenoreceptor antagonists, not elsewhere classified</b>               | <b>105 (3)</b>            | <b>7 (2)</b>                 | <b>3 (1)</b>             | <b>4 (2)</b>              |
| T45: Systemic and haematological agents                                               | 286 (8)                   | 23 (6)                       | 14 (4)                   | 12 (5)                    |
| <b>T45.0: Antiallergic and antiemetic drugs</b>                                       | <b>150 (4)</b>            | <b>14 (4)</b>                | <b>10 (3)</b>            | <b>8 (3)</b>              |
| <b>T45.4: Iron and its compounds</b>                                                  | <b>83 (2)</b>             | <b>r</b>                     | <b>r</b>                 | <b>r</b>                  |
| T46: Cardiovascular system drugs                                                      | 382 (11)                  | 56 (14)                      | 52 (16)                  | 34 (14)                   |
| <b>T46.5: Other antihypertensives, not elsewhere classified</b>                       | <b>211 (6)</b>            | <b>38 (10)</b>               | <b>35 (11)</b>           | <b>21 (8)</b>             |
| T47: Gastrointestinal system drugs                                                    | 80 (2)                    | 8 (2)                        | 6 (2)                    | 6 (2)                     |
| T48: Smooth and skeletal muscle and respiratory system agents                         | 98 (3)                    | 6 (2)                        | 4 (1)                    | 5 (2)                     |
| T49: Topical agents and ophthalmological, otorhinolaryngological and dental drugs     | 143 (4)                   | 12 (3)                       | 9 (3)                    | 8 (3)                     |
| T50: Diuretics and other and unspecified drugs, medicaments and biological substances | 207 (6)                   | 22 (6)                       | 17 (5)                   | 15 (6)                    |
| <b>T50.9: Other and unspecified drugs, medicaments and biologicals</b>                | <b>94 (3)</b>             | <b>10 (3)</b>                | <b>10 (3)</b>            | <b>5 (2)</b>              |

1  
2  
3  
4  
5  
6  
7  
8  
9  
10  
11  
12  
13  
14  
15  
16  
17  
18  
19  
20  
21  
22  
23  
24  
25  
26  
27  
28  
29  
30  
31  
32  
33  
34  
35  
36  
37  
38  
39  
40  
41  
42  
43  
44  
45  
46  
47

---

*Non-pharmaceutical agents*

|                                                                                 |         |        |        |        |
|---------------------------------------------------------------------------------|---------|--------|--------|--------|
| T51: Toxic effect of alcohol                                                    | 35 (1)  | 5 (1)  | 4 (1)  | 2 (1)  |
| T52: Toxic effect of organic solvents                                           | 185 (5) | 22 (6) | 19 (6) | 14 (6) |
| T53: Toxic effect of halogen derivatives of aliphatic and aromatic hydrocarbons | 10 (0)  | 0 (0)  | 0 (0)  | 0 (0)  |
| T54-55: Toxic effect of corrosive substances, soaps and detergents <sup>e</sup> | 132 (4) | 17 (4) | 15 (5) | 9 (4)  |
| T57: Toxic effect of other inorganic substances                                 | 0 (0)   | 0 (0)  | 0 (0)  | 0 (0)  |
| T60: Toxic effect of pesticides                                                 | 106 (3) | 12 (3) | 12 (4) | 5 (2)  |
| T65: Toxic effect of other and unspecified substances                           | 124 (4) | 21 (5) | 20 (6) | 16 (6) |

<sup>a</sup> Child identified as Aboriginal in any APDC record between their birth and fifth birthday  
<sup>b</sup> Child identified as Aboriginal in the most recent APDC record between their birth and fifth birthday  
<sup>c</sup> Child identified as Aboriginal in their APDC birth record  
<sup>d</sup> May exceed total number of poisoning admissions due to multiple agents per admission  
<sup>e</sup> Categories combined due to small cell numbers  
<sup>f</sup> Suppressed due to small cell numbers

Peer review only



**Supplementary Table 5: Clinical outcomes, Aboriginal children, by identification method**

| Clinical outcomes                                              | Total N (%) | Aboriginal children N (%)    |                          |                           |
|----------------------------------------------------------------|-------------|------------------------------|--------------------------|---------------------------|
|                                                                |             | Ever-identified <sup>a</sup> | Most recent <sup>b</sup> | Birth record <sup>c</sup> |
| Total number of poisoning admissions                           | 3,436 (100) | 391 (100)                    | 327 (100)                | 251 (100)                 |
| Repeat admissions                                              | 51 (1)      | 9 (2)                        | 8 (2)                    | 5 (2)                     |
| Length of stay (days)                                          |             |                              |                          |                           |
| <1                                                             | 1,210 (35)  | 125 (32)                     | 102 (31)                 | 75 (30)                   |
| 1                                                              | 1,932 (56)  | 225 (58)                     | 193 (59)                 | 150 (60)                  |
| 2                                                              | 183 (5)     | 25 (6)                       | 19 (6)                   | 17 (7)                    |
| 3+                                                             | 111 (3)     | 16 (4)                       | 13 (4)                   | 9 (4)                     |
| Total number of procedures                                     | 374 (11)    | 39 (10)                      | 33 (10)                  | 26 (10)                   |
| Allied health interventions                                    | 260 (8)     | 27 (7)                       | 24 (7)                   | 20 (8)                    |
| Airway and ventilation                                         | 37 (1)      | 5 (1)                        | 3 (1)                    | 3 (1)                     |
| Other (including diagnostics and pharmacotherapy) <sup>d</sup> | 77 (2)      | 7 (2)                        | 6 (2)                    | 3 (1)                     |

<sup>a</sup>Child identified as Aboriginal in any APDC record between their birth and fifth birthday

<sup>b</sup>Child identified as Aboriginal in the most recent APDC record between their birth and fifth birthday

<sup>c</sup>Child identified as Aboriginal in their APDC birth record

<sup>d</sup>Combined due to small cell numbers

## Supplement 2: Included and excluded poisoning agents, by ICD-10-AM code

---

### Included agents

---

#### *Pharmaceutical Agents*

- T36: Poisoning by systemic antibiotics
- T37: Poisoning by other systemic anti-infectives and antiparasitics
- T38: Poisoning by hormones and their synthetic substitutes and antagonists, not elsewhere classified
- T39: Poisoning by nonopioid analgesics, antipyretics and antirheumatics
- T40: Poisoning by narcotics and psychodysleptics [hallucinogens]
- T41: Poisoning by anaesthetics and therapeutic gases
- T42: Poisoning by antiepileptic, sedative-hypnotic and antiparkinsonism drugs
- T43: Poisoning by psychotropic drugs, not elsewhere classified
- T44: Poisoning by drugs primarily affecting the autonomic nervous system
- T45: Poisoning by primarily systemic and haematological agents, not elsewhere classified
- T46: Poisoning by agents primarily affecting the cardiovascular system
- T47: Poisoning by agents primarily affecting the gastrointestinal system
- T48: Poisoning by agents primarily acting on smooth and skeletal muscle and respiratory system
- T49: Poisoning by topical agents primarily affecting skin and mucosal membrane and by ophthalmological, otorhinolaryngological and dental drugs
- T50: Diuretics and other and unspecified drugs, medicaments and biological substances

---

#### *Non pharmaceutical agents*

- T51: Toxic effect of alcohol
- T52: Toxic effect of organic solvents
- T53: Toxic effect of halogen derivatives of aliphatic and aromatic hydrocarbons
- T54: Toxic effect of corrosive substances
- T55: Toxic effect of soaps and detergents
- T57: Toxic effect of other inorganic substances
- T60: Toxic effect of pesticides
- T65: Toxic effect of other and unspecified substances

---

### Excluded agents

---

- T56: Toxic effect of metals (*includes lead, mercury*)
- T58: Toxic effect of carbon monoxide
- T59: Toxic effect of other gases, fumes and vapours
- T61: Toxic effect of noxious substances eaten as food (*includes fish, shellfish*)
- T62: Toxic effect of other noxious substances eaten as food (*includes mushrooms, berries*)
- T63: Toxic effect of contact with venomous animals
- T64: Toxic effect of aflatoxin and other mycotoxins
-

## STROBE Statement—checklist of items that should be included in reports of observational studies

|                           | Item No | Recommendation                                                                                                                                                                                                                                                                                                                                                                                                                                                         | Completed (page)                                                                                                                                                                                          |
|---------------------------|---------|------------------------------------------------------------------------------------------------------------------------------------------------------------------------------------------------------------------------------------------------------------------------------------------------------------------------------------------------------------------------------------------------------------------------------------------------------------------------|-----------------------------------------------------------------------------------------------------------------------------------------------------------------------------------------------------------|
| <b>Title and abstract</b> | 1       | (a) Indicate the study's design with a commonly used term in the title or the abstract                                                                                                                                                                                                                                                                                                                                                                                 | Yes (2)                                                                                                                                                                                                   |
|                           |         | (b) Provide in the abstract an informative and balanced summary of what was done and what was found                                                                                                                                                                                                                                                                                                                                                                    | Yes (2)                                                                                                                                                                                                   |
| <b>Introduction</b>       |         |                                                                                                                                                                                                                                                                                                                                                                                                                                                                        |                                                                                                                                                                                                           |
| Background/rationale      | 2       | Explain the scientific background and rationale for the investigation being reported                                                                                                                                                                                                                                                                                                                                                                                   | Yes (4)                                                                                                                                                                                                   |
| Objectives                | 3       | State specific objectives, including any prespecified hypotheses                                                                                                                                                                                                                                                                                                                                                                                                       | Yes (4)                                                                                                                                                                                                   |
| <b>Methods</b>            |         |                                                                                                                                                                                                                                                                                                                                                                                                                                                                        |                                                                                                                                                                                                           |
| Study design              | 4       | Present key elements of study design early in the paper                                                                                                                                                                                                                                                                                                                                                                                                                | Yes (6)                                                                                                                                                                                                   |
| Setting                   | 5       | Describe the setting, locations, and relevant dates, including periods of recruitment, exposure, follow-up, and data collection                                                                                                                                                                                                                                                                                                                                        | Yes (6)                                                                                                                                                                                                   |
| Participants              | 6       | (a) <i>Cohort study</i> —Give the eligibility criteria, and the sources and methods of selection of participants. Describe methods of follow-up<br><i>Case-control study</i> —Give the eligibility criteria, and the sources and methods of case ascertainment and control selection. Give the rationale for the choice of cases and controls<br><i>Cross-sectional study</i> —Give the eligibility criteria, and the sources and methods of selection of participants | Cohort study:<br>Eligibility criteria and methods of selection included<br>(6)                                                                                                                            |
|                           |         | (b) <i>Cohort study</i> —For matched studies, give matching criteria and number of exposed and unexposed<br><i>Case-control study</i> —For matched studies, give matching criteria and the number of controls per case                                                                                                                                                                                                                                                 |                                                                                                                                                                                                           |
| Variables                 | 7       | Clearly define all outcomes, exposures, predictors, potential confounders, and effect modifiers. Give diagnostic criteria, if applicable                                                                                                                                                                                                                                                                                                                               | Outcomes, exposures, predictors (logistic regression model, demographic predictor variables)<br>ICD-10 diagnostic codes described (full list of included/excluded codes available in Supplement 2)<br>(7) |
| Data sources/measurement  | 8*      | For each variable of interest, give sources of data and details of methods of assessment (measurement). Describe comparability of assessment methods if there is more than one group                                                                                                                                                                                                                                                                                   | Yes (6)                                                                                                                                                                                                   |
| Bias                      | 9       | Describe any efforts to address potential sources of bias                                                                                                                                                                                                                                                                                                                                                                                                              | “Clear zone” method used to reduce potential overcounting of hospital admissions related to same incident                                                                                                 |

1  
2  
3  
4  
5  
6  
7  
8  
9  
10  
11  
12  
13  
14  
15  
16  
17  
18  
19  
20  
21  
22  
23  
24  
25  
26  
27  
28  
29  
30  
31  
32  
33  
34  
35  
36  
37  
38  
39  
40  
41  
42  
43  
44  
45  
46  
47  
48  
49  
50  
51  
52  
53  
54  
55  
56  
57  
58  
59  
60

presentation (7)

Use of ever-identified identification method may introduce bias in that children who are more frequently sick, and present to hospital more times, are more likely to be identified.

|                        |    |                                                                                                                                                                                                                                                                                                           |                                          |
|------------------------|----|-----------------------------------------------------------------------------------------------------------------------------------------------------------------------------------------------------------------------------------------------------------------------------------------------------------|------------------------------------------|
| Study size             | 10 | Explain how the study size was arrived at                                                                                                                                                                                                                                                                 | (9)                                      |
| Quantitative variables | 11 | Explain how quantitative variables were handled in the analyses. If applicable, describe which groupings were chosen and why                                                                                                                                                                              |                                          |
| Statistical methods    | 12 | (a) Describe all statistical methods, including those used to control for confounding                                                                                                                                                                                                                     | Yes (7-8)                                |
|                        |    | (b) Describe any methods used to examine subgroups and interactions                                                                                                                                                                                                                                       |                                          |
|                        |    | (c) Explain how missing data were addressed                                                                                                                                                                                                                                                               | All model covariates were fully observed |
|                        |    | (d) <i>Cohort study</i> —If applicable, explain how loss to follow-up was addressed<br><i>Case-control study</i> —If applicable, explain how matching of cases and controls was addressed<br><i>Cross-sectional study</i> —If applicable, describe analytical methods taking account of sampling strategy |                                          |
|                        |    | (e) Describe any sensitivity analyses                                                                                                                                                                                                                                                                     | Yes (16)                                 |

Continued on next page

| <b>Results</b>           |     |                                                                                                                                                                                                              |                                                               |
|--------------------------|-----|--------------------------------------------------------------------------------------------------------------------------------------------------------------------------------------------------------------|---------------------------------------------------------------|
| Participants             | 13* | (a) Report numbers of individuals at each stage of study—eg numbers potentially eligible, examined for eligibility, confirmed eligible, included in the study, completing follow-up, and analysed            | Yes (9)                                                       |
|                          |     | (b) Give reasons for non-participation at each stage                                                                                                                                                         | N/A                                                           |
|                          |     | (c) Consider use of a flow diagram                                                                                                                                                                           | Yes                                                           |
| Descriptive data         | 14* | (a) Give characteristics of study participants (eg demographic, clinical, social) and information on exposures and potential confounders                                                                     | Yes (Table 1) (9)                                             |
|                          |     | (b) Indicate number of participants with missing data for each variable of interest                                                                                                                          | N/A                                                           |
|                          |     | (c) <i>Cohort study</i> —Summarise follow-up time (eg, average and total amount)                                                                                                                             | Yes (9)                                                       |
| Outcome data             | 15* | <i>Cohort study</i> —Report numbers of outcome events or summary measures over time                                                                                                                          | Yes (9)                                                       |
|                          |     | <i>Case-control study</i> —Report numbers in each exposure category, or summary measures of exposure                                                                                                         |                                                               |
|                          |     | <i>Cross-sectional study</i> —Report numbers of outcome events or summary measures                                                                                                                           |                                                               |
| Main results             | 16  | (a) Give unadjusted estimates and, if applicable, confounder-adjusted estimates and their precision (eg, 95% confidence interval). Make clear which confounders were adjusted for and why they were included | Unadjusted and adjusted odds ratios presented with 95% CI (9) |
|                          |     | (b) Report category boundaries when continuous variables were categorized                                                                                                                                    | N/A                                                           |
|                          |     | (c) If relevant, consider translating estimates of relative risk into absolute risk for a meaningful time period                                                                                             | N/A                                                           |
| Other analyses           | 17  | Report other analyses done—eg analyses of subgroups and interactions, and sensitivity analyses                                                                                                               | Sensitivity analyses described (16)                           |
| <b>Discussion</b>        |     |                                                                                                                                                                                                              |                                                               |
| Key results              | 18  | Summarise key results with reference to study objectives                                                                                                                                                     | Yes (17)                                                      |
| Limitations              | 19  | Discuss limitations of the study, taking into account sources of potential bias or imprecision. Discuss both direction and magnitude of any potential bias                                                   | Limitations described (18)                                    |
| Interpretation           | 20  | Give a cautious overall interpretation of results considering objectives, limitations, multiplicity of analyses, results from similar studies, and other relevant evidence                                   | Yes (17)                                                      |
| Generalisability         | 21  | Discuss the generalisability (external validity) of the study results                                                                                                                                        | Implications of study findings described (19)                 |
| <b>Other information</b> |     |                                                                                                                                                                                                              |                                                               |
| Funding                  | 22  | Give the source of funding and the role of the funders for the present study and, if applicable, for the original study on which the present article is based                                                | Yes (21)                                                      |

\*Give information separately for cases and controls in case-control studies and, if applicable, for exposed and unexposed groups in cohort and cross-sectional studies.

1  
2  
3  
4  
5  
6  
7  
8  
9  
10  
11  
12  
13  
14  
15  
16  
17  
18  
19  
20  
21  
22  
23  
24  
25  
26  
27  
28  
29  
30  
31  
32  
33  
34  
35  
36  
37  
38  
39  
40  
41  
42  
43  
44  
45  
46  
47  
48  
49  
50  
51  
52  
53  
54  
55  
56  
57  
58  
59  
60

**Note:** An Explanation and Elaboration article discusses each checklist item and gives methodological background and published examples of transparent reporting. The STROBE checklist is best used in conjunction with this article (freely available on the Web sites of PLoS Medicine at <http://www.plosmedicine.org/>, Annals of Internal Medicine at <http://www.annals.org/>, and Epidemiology at <http://www.epidem.com/>). Information on the STROBE Initiative is available at [www.strobe-statement.org](http://www.strobe-statement.org).

For peer review only
