# Supplementary material for: Demographic and clinical characteristics of hospitalised unintentional poisoning in Aboriginal and non-Aboriginal preschool children in New South Wales, Australia: a population data linkage study
Source: PubMed Central journal article supplement — BMJ Open. 2019 Jan 30;9(1):e022633. doi: 10.1136/bmjopen-2018-022633 (PMC6359875; doi:10.1136/bmjopen-2018-022633), 2019-01-30
Supplement: bmjopen-2018-022633supp001.pdf [file bmjopen-2018-022633supp001.pdf]

## **Supplement 1: Comparison of results by Aboriginal identification method**

### **List of content:**

**Supplementary Table 1:** Number of Aboriginal children, by identification method

**Supplementary Table 2:** Adjusted odds ratio of poisoning admission by demographic characteristics, Aboriginal and non-Aboriginal children, by identification method (Answers RQ1)

**Supplementary Table 3:** Age at admission, Aboriginal children, by identification method (Answers RQ1)

**Supplementary Table 4:** Poisoning agents, Aboriginal children, by identification method (Answers RQ2)

**Supplementary Table 5:** Clinical outcomes, Aboriginal children, by identification method (Answers RQ3)

### Research Questions (RQ):

- 1) Are the demographic risk factors for poisoning (sex, socioeconomic status and geographic remoteness) similar for both Aboriginal and non-Aboriginal children?
- 2) Which agents most frequently result in poisoning hospitalisation and are they different for Aboriginal and non-Aboriginal children?
- 3) Are the clinical outcomes from hospitalised poisoning similar for Aboriginal and non-Aboriginal children?

**Supplementary Table 1: Number of Aboriginal children, by identification method**

| Identification method        | Number of Aboriginal children identified |                           |
|------------------------------|------------------------------------------|---------------------------|
|                              | Cohort                                   | Poisoned (% total cohort) |
| Ever identified <sup>a</sup> | 28,528                                   | 382 (1.34)                |
| Most recent <sup>b</sup>     | 25,891                                   | 319 (1.23)                |
| Birth record <sup>c</sup>    | 21,576                                   | 246 (1.14)                |

<sup>a</sup> Child identified as Aboriginal in any APDC record between their birth and fifth birthday

<sup>b</sup> Child identified as Aboriginal in the most recent APDC record between their birth and fifth birthday

<sup>c</sup> Child identified as Aboriginal in their APDC birth record

**Supplementary Table 2: Adjusted odds ratio of poisoning admission by demographic characteristics, Aboriginal and non-Aboriginal children, by identification method**

| Variables                        | Non-Aboriginal children<br>(n=738,591) | Aboriginal children                        |                                        |                                         |
|----------------------------------|----------------------------------------|--------------------------------------------|----------------------------------------|-----------------------------------------|
|                                  |                                        | Ever-identified <sup>c</sup><br>(n=28,528) | Most recent <sup>d</sup><br>(n=25,891) | Birth record <sup>e</sup><br>(n=21,576) |
| Logistic regression <sup>a</sup> | aOR <sup>b</sup> (95% CI)              | aOR (95% CI)                               | aOR (95% CI)                           | aOR (95% CI)                            |
| Sex                              |                                        |                                            |                                        |                                         |
| Female                           | 1                                      | 1                                          | 1                                      | 1                                       |
| Male                             | 1.17 (1.09-1.26)                       | 1.27 (1.03-1.56)                           | 1.34 (1.07-1.67)                       | 1.44 (1.12-1.87)                        |
| Area-level disadvantage          |                                        |                                            |                                        |                                         |
| 1 (Least disadvantaged)          | 1                                      | 1                                          | 1                                      | 1                                       |
| 2                                | 1.34 (1.21-1.48)                       | 1.84 (1.07-3.15)                           | 1.95 (1.00-3.82)                       | 1.90 (0.89-4.05)                        |
| 3 (Most disadvantaged)           | 1.64 (1.48-1.81)                       | 1.57 (0.92-2.69)                           | 1.71 (0.88-3.34)                       | 2.02 (0.96-4.27)                        |
| Remoteness                       |                                        |                                            |                                        |                                         |
| Major cities                     | 1                                      | 1                                          | 1                                      | 1                                       |
| Inner regional                   | 1.33 (1.22-1.44)                       | 1.06 (0.82-1.39)                           | 1.32 (0.97-1.79)                       | 1.01 (0.72-1.41)                        |
| Outer regional                   | 1.66 (1.47-1.87)                       | 1.39 (1.02-1.88)                           | 1.65 (1.17-2.34)                       | 1.10 (0.75-1.62)                        |
| Remote/Very remote               | 1.97 (1.46-2.66)                       | 1.18 (0.78-1.79)                           | 1.38 (0.87-2.17)                       | 1.10 (0.68-1.77)                        |

<sup>a</sup> Full model included all demographic variables (sex, disadvantage, remoteness)

<sup>b</sup> aOR: adjusted odds ratio

<sup>c</sup> Child identified as Aboriginal in any APDC record between their birth and fifth birthday

<sup>d</sup> Child identified as Aboriginal in the most recent APDC record between their birth and fifth birthday

<sup>e</sup> Child identified as Aboriginal in their APDC birth record

**Supplementary Table 3: Age at admission, Aboriginal children, by identification method**

| Age (years)                       | Total<br><i>N</i> (column %) | Aboriginal children                                 |                                                 |                                                  |
|-----------------------------------|------------------------------|-----------------------------------------------------|-------------------------------------------------|--------------------------------------------------|
|                                   |                              | Ever-identified <sup>a</sup><br><i>N</i> (column %) | Most recent <sup>b</sup><br><i>N</i> (column %) | Birth record <sup>c</sup><br><i>N</i> (column %) |
| <1                                | 241 (7)                      | 21 (6)                                              | 18 (6)                                          | 13 (5)                                           |
| 1-2                               | 1048 (31)                    | 96 (25)                                             | 80 (25)                                         | 62 (25)                                          |
| 2-3                               | 1363 (40)                    | 152 (40)                                            | 127 (40)                                        | 95 (39)                                          |
| 3-4                               | 519 (15)                     | 73 (19)                                             | 59 (19)                                         | 46 (19)                                          |
| 4-5                               | 214 (6)                      | 40 (10)                                             | 35 (11)                                         | 30 (12)                                          |
| Total number of children poisoned | 3385 (100)                   | 382 (100)                                           | 319 (100)                                       | 246 (100)                                        |

<sup>a</sup>Child identified as Aboriginal in any APDC record between their birth and fifth birthday

<sup>b</sup>Child identified as Aboriginal in the most recent APDC record between their birth and fifth birthday

<sup>c</sup>Child identified as Aboriginal in their APDC birth record

**Supplementary Table 4: Poisoning agents, Aboriginal children, by identification method**

| ICD-10 Diagnosis Code                                                                 | Aboriginal children N (%) |                              |                          |                           |
|---------------------------------------------------------------------------------------|---------------------------|------------------------------|--------------------------|---------------------------|
|                                                                                       | Total N (%)               | Ever-identified <sup>a</sup> | Most recent <sup>b</sup> | Birth record <sup>c</sup> |
| T36-65: All poisoning admissions                                                      | 3,436 (100)               | 391 (11)                     | 327 (10)                 | 251 (7)                   |
| T36-50: Pharmaceutical <sup>d</sup>                                                   | 2,859 (83)                | 318 (81)                     | 261 (80)                 | 207 (82)                  |
| T51-65: Non-pharmaceutical <sup>d</sup>                                               | 588 (17)                  | 76 (19)                      | 69 (21)                  | 46 (18)                   |
| <i>Pharmaceutical Agents</i>                                                          |                           |                              |                          |                           |
| T36-37: Antibiotics, anti-infectives, anti-parasitics <sup>e</sup>                    | 47 (1)                    | 7 (2)                        | 4 (1)                    | 6 (2)                     |
| T38: Hormones and synthetic substitutes                                               | 141 (4)                   | 22 (6)                       | 18 (6)                   | 14 (7)                    |
| <b>T38.3: Insulin and oral hypoglycemic drugs</b>                                     | <b>96 (3)</b>             | <b>17 (4)</b>                | <b>15 (5)</b>            | <b>11 (4)</b>             |
| T39: Nonopioid analgesics, antipyretics and antirheumatics                            | 493 (14)                  | 31 (8)                       | 23 (7)                   | 18 (7)                    |
| <b>T39.1: 4-aminophenol derivatives</b>                                               | <b>374 (11)</b>           | <b>24 (6)</b>                | <b>19 (6)</b>            | <b>16 (6)</b>             |
| T40 Narcotics and hallucinogens                                                       | 178 (5)                   | 25 (6)                       | 20 (6)                   | 19 (8)                    |
| T41: Poisoning by anaesthetics and therapeutic gases                                  | 14 (0)                    | 0 (0)                        | 0 (0)                    | 0 (0)                     |
| T42: Antiepileptic, sedative-hypnotic and antiparkinsonism                            | 492 (14)                  | 66 (17)                      | 57 (17)                  | 46 (18)                   |
| <b>T42.4: Benzodiazepines</b>                                                         | <b>370 (11)</b>           | <b>55 (14)</b>               | <b>48 (15)</b>           | <b>38 (15)</b>            |
| T43: Psychotropic drugs, not elsewhere classified                                     | 394 (11)                  | 55 (14)                      | 47 (14)                  | 36 (14)                   |
| <b>T43.2: Other and unspecified antidepressants</b>                                   | <b>149 (4)</b>            | <b>15 (4)</b>                | <b>11 (3)</b>            | <b>9 (4)</b>              |
| T44: Autonomic nervous system drugs                                                   | 251 (7)                   | 19 (5)                       | 12 (4)                   | 12 (5)                    |
| <b>T44.3: Other parasympatholytics and spasmolytics, not elsewhere classified</b>     | <b>93 (3)</b>             | <b>7 (2)</b>                 | <b>5 (2)</b>             | <b>5 (2)</b>              |
| <b>T44.7: Beta adrenoreceptor antagonists, not elsewhere classified</b>               | <b>105 (3)</b>            | <b>7 (2)</b>                 | <b>3 (1)</b>             | <b>4 (2)</b>              |
| T45: Systemic and haematological agents                                               | 286 (8)                   | 23 (6)                       | 14 (4)                   | 12 (5)                    |
| <b>T45.0: Antiallergic and antiemetic drugs</b>                                       | <b>150 (4)</b>            | <b>14 (4)</b>                | <b>10 (3)</b>            | <b>8 (3)</b>              |
| <b>T45.4: Iron and its compounds</b>                                                  | <b>83 (2)</b>             | <b>r</b>                     | <b>r</b>                 | <b>r</b>                  |
| T46: Cardiovascular system drugs                                                      | 382 (11)                  | 56 (14)                      | 52 (16)                  | 34 (14)                   |
| <b>T46.5: Other antihypertensives, not elsewhere classified</b>                       | <b>211 (6)</b>            | <b>38 (10)</b>               | <b>35 (11)</b>           | <b>21 (8)</b>             |
| T47: Gastrointestinal system drugs                                                    | 80 (2)                    | 8 (2)                        | 6 (2)                    | 6 (2)                     |
| T48: Smooth and skeletal muscle and respiratory system agents                         | 98 (3)                    | 6 (2)                        | 4 (1)                    | 5 (2)                     |
| T49: Topical agents and ophthalmological, otorhinolaryngological and dental drugs     | 143 (4)                   | 12 (3)                       | 9 (3)                    | 8 (3)                     |
| T50: Diuretics and other and unspecified drugs, medicaments and biological substances | 207 (6)                   | 22 (6)                       | 17 (5)                   | 15 (6)                    |
| <b>T50.9: Other and unspecified drugs, medicaments and biologicals</b>                | <b>94 (3)</b>             | <b>10 (3)</b>                | <b>10 (3)</b>            | <b>5 (2)</b>              |

---

| <i>Non-pharmaceutical agents</i>                                                |         |        |        |        |
|---------------------------------------------------------------------------------|---------|--------|--------|--------|
| T51: Toxic effect of alcohol                                                    | 35 (1)  | 5 (1)  | 4 (1)  | 2 (1)  |
| T52: Toxic effect of organic solvents                                           | 185 (5) | 22 (6) | 19 (6) | 14 (6) |
| T53: Toxic effect of halogen derivatives of aliphatic and aromatic hydrocarbons | 10 (0)  | 0 (0)  | 0 (0)  | 0 (0)  |
| T54-55: Toxic effect of corrosive substances, soaps and detergents <sup>e</sup> | 132 (4) | 17 (4) | 15 (5) | 9 (4)  |
| T57: Toxic effect of other inorganic substances                                 | 0 (0)   | 0 (0)  | 0 (0)  | 0 (0)  |
| T60: Toxic effect of pesticides                                                 | 106 (3) | 12 (3) | 12 (4) | 5 (2)  |
| T65: Toxic effect of other and unspecified substances                           | 124 (4) | 21 (5) | 20 (6) | 16 (6) |

---

<sup>a</sup> Child identified as Aboriginal in any APDC record between their birth and fifth birthday

<sup>b</sup> Child identified as Aboriginal in the most recent APDC record between their birth and fifth birthday

<sup>c</sup> Child identified as Aboriginal in their APDC birth record

<sup>d</sup> May exceed total number of poisoning admissions due to multiple agents per admission

<sup>e</sup> Categories combined due to small cell numbers

<sup>f</sup> Suppressed due to small cell numbers

**Supplementary Table 5: Clinical outcomes, Aboriginal children, by identification method**

| Clinical outcomes                                              | Total N (%) | Aboriginal children N (%)    |                          |                           |
|----------------------------------------------------------------|-------------|------------------------------|--------------------------|---------------------------|
|                                                                |             | Ever-identified <sup>a</sup> | Most recent <sup>b</sup> | Birth record <sup>c</sup> |
| Total number of poisoning admissions                           | 3,436 (100) | 391 (100)                    | 327 (100)                | 251 (100)                 |
| Repeat admissions                                              | 51 (1)      | 9 (2)                        | 8 (2)                    | 5 (2)                     |
| Length of stay (days)                                          |             |                              |                          |                           |
| <1                                                             | 1,210 (35)  | 125 (32)                     | 102 (31)                 | 75 (30)                   |
| 1                                                              | 1,932 (56)  | 225 (58)                     | 193 (59)                 | 150 (60)                  |
| 2                                                              | 183 (5)     | 25 (6)                       | 19 (6)                   | 17 (7)                    |
| 3+                                                             | 111 (3)     | 16 (4)                       | 13 (4)                   | 9 (4)                     |
| Total number of procedures                                     | 374 (11)    | 39 (10)                      | 33 (10)                  | 26 (10)                   |
| Allied health interventions                                    | 260 (8)     | 27 (7)                       | 24 (7)                   | 20 (8)                    |
| Airway and ventilation                                         | 37 (1)      | 5 (1)                        | 3 (1)                    | 3 (1)                     |
| Other (including diagnostics and pharmacotherapy) <sup>d</sup> | 77 (2)      | 7 (2)                        | 6 (2)                    | 3 (1)                     |

<sup>a</sup> Child identified as Aboriginal in any APDC record between their birth and fifth birthday

<sup>b</sup> Child identified as Aboriginal in the most recent APDC record between their birth and fifth birthday

<sup>c</sup> Child identified as Aboriginal in their APDC birth record

<sup>d</sup> Combined due to small cell numbers
