# Supplementary material for: Demographic and clinical characteristics of hospitalised unintentional poisoning in Aboriginal and non-Aboriginal preschool children in New South Wales, Australia: a population data linkage study
Source: PubMed Central journal article supplement — BMJ Open. 2019 Jan 30;9(1):e022633. doi: 10.1136/bmjopen-2018-022633 (PMC6359875; doi:10.1136/bmjopen-2018-022633), 2019-01-30
Supplement: bmjopen-2018-022633supp002.pdf [file bmjopen-2018-022633supp002.pdf]

## Supplement 2: Included and excluded poisoning agents, by ICD-10-AM code

---

### Included agents

---

#### *Pharmaceutical Agents*

- T36: Poisoning by systemic antibiotics
- T37: Poisoning by other systemic anti-infectives and antiparasitics
- T38: Poisoning by hormones and their synthetic substitutes and antagonists, not elsewhere classified
- T39: Poisoning by nonopioid analgesics, antipyretics and antirheumatics
- T40: Poisoning by narcotics and psychodysleptics [hallucinogens]
- T41: Poisoning by anaesthetics and therapeutic gases
- T42: Poisoning by antiepileptic, sedative-hypnotic and antiparkinsonism drugs
- T43: Poisoning by psychotropic drugs, not elsewhere classified
- T44: Poisoning by drugs primarily affecting the autonomic nervous system
- T45: Poisoning by primarily systemic and haematological agents, not elsewhere classified
- T46: Poisoning by agents primarily affecting the cardiovascular system
- T47: Poisoning by agents primarily affecting the gastrointestinal system
- T48: Poisoning by agents primarily acting on smooth and skeletal muscle and respiratory system
- T49: Poisoning by topical agents primarily affecting skin and mucosal membrane and by ophthalmological, otorhinolaryngological and dental drugs
- T50: Diuretics and other and unspecified drugs, medicaments and biological substances

---

#### *Non pharmaceutical agents*

- T51: Toxic effect of alcohol
- T52: Toxic effect of organic solvents
- T53: Toxic effect of halogen derivatives of aliphatic and aromatic hydrocarbons
- T54: Toxic effect of corrosive substances
- T55: Toxic effect of soaps and detergents
- T57: Toxic effect of other inorganic substances
- T60: Toxic effect of pesticides
- T65: Toxic effect of other and unspecified substances

---

### Excluded agents

---

- T56: Toxic effect of metals (*includes lead, mercury*)
  - T58: Toxic effect of carbon monoxide
  - T59: Toxic effect of other gases, fumes and vapours
  - T61: Toxic effect of noxious substances eaten as food (*includes fish, shellfish*)
  - T62: Toxic effect of other noxious substances eaten as food (*includes mushrooms, berries*)
  - T63: Toxic effect of contact with venomous animals
  - T64: Toxic effect of aflatoxin and other mycotoxins
-
